# Supplementary material for: Accurate and complete genomes from metagenomes
Source: Genome Res. 2020 Mar;30(3):315–33. doi: 10.1101/gr.258640.119 (PMC7111523; doi:10.1101/gr.258640.119)
Supplement: Supplemental Material [file supp_gr.258640.119_Supplemental_Table_S1.xlsx]

## Sheet: Table S1
Table S1. Ribosomal proteins in the initial Parcubacteria bin, their best hit on the NCBI, and alignment statistics.
Gene	Contig	Best hit on NCBI	Percent alignment	Percent identity	Accession
Ribosomal_L10	PR_node_1290	Candidatus Zambryskibacteria	0.99	0.6	OHA92782
Ribosomal_L13	PR_node_260	Candidatus Zambryskibacteria	0.97	0.66	OHB12744
Ribosomal_L13	PR_node_287	Polaromonas naphthalenivorans	0.38	0.96	A1VJJ3
Ribosomal_L14	HT_node_2492	Rhodospirillales bacterium	0.81	0.36	OJW27693
Ribosomal_L17	PR_node_260	Candidatus Lloydbacteria	1	0.64	OGZ03809
Ribosomal_L2	PR_node_444	Parcubacteria	1	0.79	KKP91491
Ribosomal_L20	PR_node_48	Candidatus Zambryskibacteria	0.96	0.64	OHA89065
Ribosomal_L21p	PR_node_340	Parcubacteria	0.83	0.58	KKR01970
Ribosomal_L23	PR_node_444	Candidatus Zambryskibacteria	0.97	0.52	OHA94501
Ribosomal_L27	PR_node_197	Parcubacteria	0.96	0.71	KKP60887
Ribosomal_L32p	PR_node_60	Candidatus Lloydbacteria	0.95	0.44	OGZ03679
Ribosomal_L4	PR_node_444	Candidatus Lloydbacteria	0.95	0.63	OGZ17743
Ribosomal_L9_N	PR_node_197	Parcubacteria	0.99	0.55	KKW11623
Ribosomal_S13	LT_node_1007	Enterococcus faecalis	1	1	EFT89376
Ribosomal_S16	PR_node_199	Parcubacteria	0.91	0.65	KKP93401
Ribosomal_S2	PR_node_296	Candidatus Taylorbacteria	0.96	0.58	OHA18677
Ribosomal_S20p	PR_node_1285	Parcubacteria	0.97	0.61	KKU59139
Ribosomal_S7	PR_node_1196	Candidatus Zambryskibacteria	0.98	0.72	OHA86974
