# Supplementary material for: Accurate and complete genomes from metagenomes
Source: Genome Res. 2020 Mar;30(3):315–33. doi: 10.1101/gr.258640.119 (PMC7111523; doi:10.1101/gr.258640.119)
Supplement: Supplemental Material [file supp_gr.258640.119_Supplemental_Table_S2.xlsx]

## Sheet: Table S2
Table S2. List of all TM7 MAGs from Pasolli et al. (downloaded from https://opendata.lifebit.ai/table/SGB). This list was used to choose the MAG we refined (showing with yellow background). Our criteria for choosing the MAG was to find a near complete MAG that comes from an individual for which there are multiple metagenomes available for the same body site.
genome_name	sgb_id	usgb	study	sample_name	genome_size	n_fifty	number_contigs	completeness	contamination	assigned_species	assigned_genus	assigned_family	assigned_order	assigned_class	assigned_phylum	assigned_kingdom	closest_species	closest_genus	closest_family	closest_order	closest_class	closest_phylum	closest_kingdom	average_distance	sequence_url	annotations_url	uniref_url
CM_periimplantitis__SP_403SPT_T016__bin.16	19907	Yes	CM_periimplantitis	SP_403SPT_T016	925468	217036	6	63.68	1.71	N/A	N/A	Candidatus Saccharibacteria	Candidatus Saccharibacteria	Candidatus Saccharibacteria	Candidatus Saccharibacteria	Bacteria	Candidatus Saccharibacteria	Candidatus Saccharibacteria	Candidatus Saccharibacteria	Candidatus Saccharibacteria	Candidatus Saccharibacteria	Candidatus Saccharibacteria	Bacteria	0.16	https://s3-eu-west-1.amazonaws.com/sgb-genomes/data/genomes/19907/CM_periimplantitis__SP_403SPT_T016__bin.16.fa	https://s3-eu-west-1.amazonaws.com/sgb-genomes/data/eggnog/19907.tsv	https://s3-eu-west-1.amazonaws.com/sgb-genomes/data/uniref/90/19907/CM_periimplantitis__SP_403SPT_T016__bin.16.txt
CM_periimplantitis__SP_189SPI_T016__bin.33	19883	Yes	CM_periimplantitis	SP_189SPI_T016	911957	159946	15	65.43	0.93	N/A	N/A	Candidatus Saccharibacteria	Candidatus Saccharibacteria	Candidatus Saccharibacteria	Candidatus Saccharibacteria	Bacteria	Candidatus Saccharibacteria	Candidatus Saccharibacteria	Candidatus Saccharibacteria	Candidatus Saccharibacteria	Candidatus Saccharibacteria	Candidatus Saccharibacteria	Bacteria	0.21	https://s3-eu-west-1.amazonaws.com/sgb-genomes/data/genomes/19883/CM_periimplantitis__SP_189SPI_T016__bin.33.fa	https://s3-eu-west-1.amazonaws.com/sgb-genomes/data/eggnog/19883.tsv	https://s3-eu-west-1.amazonaws.com/sgb-genomes/data/uniref/90/19883/CM_periimplantitis__SP_189SPI_T016__bin.33.txt
HMP_2012__SRS016575__bin.36	19908	Yes	HMP_2012	SRS016575	908037	55592	36	64.62	2.78	N/A	N/A	Candidatus Saccharibacteria	Candidatus Saccharibacteria	Candidatus Saccharibacteria	Candidatus Saccharibacteria	Bacteria	Candidatus Saccharibacteria	Candidatus Saccharibacteria	Candidatus Saccharibacteria	Candidatus Saccharibacteria	Candidatus Saccharibacteria	Candidatus Saccharibacteria	Bacteria	0.18	https://s3-eu-west-1.amazonaws.com/sgb-genomes/data/genomes/19908/HMP_2012__SRS016575__bin.36.fa	https://s3-eu-west-1.amazonaws.com/sgb-genomes/data/eggnog/19908.tsv	https://s3-eu-west-1.amazonaws.com/sgb-genomes/data/uniref/90/19908/HMP_2012__SRS016575__bin.36.txt
HMP_2012__SRS022602__bin.59	19849	No	HMP_2012	SRS022602	902373	39252	33	61.11	3.7	Candidatus Saccharibacteria	Candidatus Saccharibacteria	Candidatus Saccharibacteria	Candidatus Saccharibacteria	Candidatus Saccharibacteria	Candidatus Saccharibacteria	Bacteria	Candidatus Saccharibacteria	Candidatus Saccharibacteria	Candidatus Saccharibacteria	Candidatus Saccharibacteria	Candidatus Saccharibacteria	Candidatus Saccharibacteria	Bacteria	0.05	https://s3-eu-west-1.amazonaws.com/sgb-genomes/data/genomes/19849/HMP_2012__SRS022602__bin.59.fa	https://s3-eu-west-1.amazonaws.com/sgb-genomes/data/eggnog/19849.tsv	https://s3-eu-west-1.amazonaws.com/sgb-genomes/data/uniref/90/19849/HMP_2012__SRS022602__bin.59.txt
HMP_2012__SRS023938__bin.39	19880	Yes	HMP_2012	SRS023938	897719	34012	57	63.39	0.85	N/A	N/A	Candidatus Saccharibacteria	Candidatus Saccharibacteria	Candidatus Saccharibacteria	Candidatus Saccharibacteria	Bacteria	Candidatus Saccharibacteria	Candidatus Saccharibacteria	Candidatus Saccharibacteria	Candidatus Saccharibacteria	Candidatus Saccharibacteria	Candidatus Saccharibacteria	Bacteria	0.23	https://s3-eu-west-1.amazonaws.com/sgb-genomes/data/genomes/19880/HMP_2012__SRS023938__bin.39.fa	https://s3-eu-west-1.amazonaws.com/sgb-genomes/data/eggnog/19880.tsv	https://s3-eu-west-1.amazonaws.com/sgb-genomes/data/uniref/90/19880/HMP_2012__SRS023938__bin.39.txt
HMP_2012__SRS019980__bin.47	19883	Yes	HMP_2012	SRS019980	887666	174756	9	63.58	0.93	N/A	N/A	Candidatus Saccharibacteria	Candidatus Saccharibacteria	Candidatus Saccharibacteria	Candidatus Saccharibacteria	Bacteria	Candidatus Saccharibacteria	Candidatus Saccharibacteria	Candidatus Saccharibacteria	Candidatus Saccharibacteria	Candidatus Saccharibacteria	Candidatus Saccharibacteria	Bacteria	0.21	https://s3-eu-west-1.amazonaws.com/sgb-genomes/data/genomes/19883/HMP_2012__SRS019980__bin.47.fa	https://s3-eu-west-1.amazonaws.com/sgb-genomes/data/eggnog/19883.tsv	https://s3-eu-west-1.amazonaws.com/sgb-genomes/data/uniref/90/19883/HMP_2012__SRS019980__bin.47.txt
HMP_2012__SRS051378__bin.11	19880	Yes	HMP_2012	SRS051378	867787	104916	21	65.1	3.63	N/A	N/A	Candidatus Saccharibacteria	Candidatus Saccharibacteria	Candidatus Saccharibacteria	Candidatus Saccharibacteria	Bacteria	Candidatus Saccharibacteria	Candidatus Saccharibacteria	Candidatus Saccharibacteria	Candidatus Saccharibacteria	Candidatus Saccharibacteria	Candidatus Saccharibacteria	Bacteria	0.23	https://s3-eu-west-1.amazonaws.com/sgb-genomes/data/genomes/19880/HMP_2012__SRS051378__bin.11.fa	https://s3-eu-west-1.amazonaws.com/sgb-genomes/data/eggnog/19880.tsv	https://s3-eu-west-1.amazonaws.com/sgb-genomes/data/uniref/90/19880/HMP_2012__SRS051378__bin.11.txt
HMP_2012__SRS023595__bin.38	19883	Yes	HMP_2012	SRS023595	862894	51554	37	61.73	0.93	N/A	N/A	Candidatus Saccharibacteria	Candidatus Saccharibacteria	Candidatus Saccharibacteria	Candidatus Saccharibacteria	Bacteria	Candidatus Saccharibacteria	Candidatus Saccharibacteria	Candidatus Saccharibacteria	Candidatus Saccharibacteria	Candidatus Saccharibacteria	Candidatus Saccharibacteria	Bacteria	0.21	https://s3-eu-west-1.amazonaws.com/sgb-genomes/data/genomes/19883/HMP_2012__SRS023595__bin.38.fa	https://s3-eu-west-1.amazonaws.com/sgb-genomes/data/eggnog/19883.tsv	https://s3-eu-west-1.amazonaws.com/sgb-genomes/data/uniref/90/19883/HMP_2012__SRS023595__bin.38.txt
HMP_2012__SRS019128__bin.46	19880	Yes	HMP_2012	SRS019128	861236	144873	12	65.1	2.56	N/A	N/A	Candidatus Saccharibacteria	Candidatus Saccharibacteria	Candidatus Saccharibacteria	Candidatus Saccharibacteria	Bacteria	Candidatus Saccharibacteria	Candidatus Saccharibacteria	Candidatus Saccharibacteria	Candidatus Saccharibacteria	Candidatus Saccharibacteria	Candidatus Saccharibacteria	Bacteria	0.23	https://s3-eu-west-1.amazonaws.com/sgb-genomes/data/genomes/19880/HMP_2012__SRS019128__bin.46.fa	https://s3-eu-west-1.amazonaws.com/sgb-genomes/data/eggnog/19880.tsv	https://s3-eu-west-1.amazonaws.com/sgb-genomes/data/uniref/90/19880/HMP_2012__SRS019128__bin.46.txt
HMP_2012__SRS017227__bin.71	19921	Yes	HMP_2012	SRS017227	853928	172163	12	60.34	1.85	N/A	N/A	Candidatus Saccharibacteria	Candidatus Saccharibacteria	Candidatus Saccharibacteria	Candidatus Saccharibacteria	Bacteria	Candidatus Saccharibacteria	Candidatus Saccharibacteria	Candidatus Saccharibacteria	Candidatus Saccharibacteria	Candidatus Saccharibacteria	Candidatus Saccharibacteria	Bacteria	0.27	https://s3-eu-west-1.amazonaws.com/sgb-genomes/data/genomes/19921/HMP_2012__SRS017227__bin.71.fa	https://s3-eu-west-1.amazonaws.com/sgb-genomes/data/eggnog/19921.tsv	https://s3-eu-west-1.amazonaws.com/sgb-genomes/data/uniref/90/19921/HMP_2012__SRS017227__bin.71.txt
CM_periimplantitis__SP_143SPI_T016__bin.12	19883	Yes	CM_periimplantitis	SP_143SPI_T016	851309	35439	42	54.32	2.78	N/A	N/A	Candidatus Saccharibacteria	Candidatus Saccharibacteria	Candidatus Saccharibacteria	Candidatus Saccharibacteria	Bacteria	Candidatus Saccharibacteria	Candidatus Saccharibacteria	Candidatus Saccharibacteria	Candidatus Saccharibacteria	Candidatus Saccharibacteria	Candidatus Saccharibacteria	Bacteria	0.21	https://s3-eu-west-1.amazonaws.com/sgb-genomes/data/genomes/19883/CM_periimplantitis__SP_143SPI_T016__bin.12.fa	https://s3-eu-west-1.amazonaws.com/sgb-genomes/data/eggnog/19883.tsv	https://s3-eu-west-1.amazonaws.com/sgb-genomes/data/uniref/90/19883/CM_periimplantitis__SP_143SPI_T016__bin.12.txt
HMP_2012__SRS024561__bin.27	19883	Yes	HMP_2012	SRS024561	849471	34729	41	61.27	2.31	N/A	N/A	Candidatus Saccharibacteria	Candidatus Saccharibacteria	Candidatus Saccharibacteria	Candidatus Saccharibacteria	Bacteria	Candidatus Saccharibacteria	Candidatus Saccharibacteria	Candidatus Saccharibacteria	Candidatus Saccharibacteria	Candidatus Saccharibacteria	Candidatus Saccharibacteria	Bacteria	0.21	https://s3-eu-west-1.amazonaws.com/sgb-genomes/data/genomes/19883/HMP_2012__SRS024561__bin.27.fa	https://s3-eu-west-1.amazonaws.com/sgb-genomes/data/eggnog/19883.tsv	https://s3-eu-west-1.amazonaws.com/sgb-genomes/data/uniref/90/19883/HMP_2012__SRS024561__bin.27.txt
HMP_2012__SRS016331__bin.19	19909	Yes	HMP_2012	SRS016331	849038	8994	122	54.48	2.78	N/A	N/A	Candidatus Saccharibacteria	Candidatus Saccharibacteria	Candidatus Saccharibacteria	Candidatus Saccharibacteria	Bacteria	Candidatus Saccharibacteria	Candidatus Saccharibacteria	Candidatus Saccharibacteria	Candidatus Saccharibacteria	Candidatus Saccharibacteria	Candidatus Saccharibacteria	Bacteria	0.18	https://s3-eu-west-1.amazonaws.com/sgb-genomes/data/genomes/19909/HMP_2012__SRS016331__bin.19.fa	https://s3-eu-west-1.amazonaws.com/sgb-genomes/data/eggnog/19909.tsv	https://s3-eu-west-1.amazonaws.com/sgb-genomes/data/uniref/90/19909/HMP_2012__SRS016331__bin.19.txt
HMP_2012__SRS016575__bin.12	19880	Yes	HMP_2012	SRS016575	843788	142233	15	65.1	2.56	N/A	N/A	Candidatus Saccharibacteria	Candidatus Saccharibacteria	Candidatus Saccharibacteria	Candidatus Saccharibacteria	Bacteria	Candidatus Saccharibacteria	Candidatus Saccharibacteria	Candidatus Saccharibacteria	Candidatus Saccharibacteria	Candidatus Saccharibacteria	Candidatus Saccharibacteria	Bacteria	0.23	https://s3-eu-west-1.amazonaws.com/sgb-genomes/data/genomes/19880/HMP_2012__SRS016575__bin.12.fa	https://s3-eu-west-1.amazonaws.com/sgb-genomes/data/eggnog/19880.tsv	https://s3-eu-west-1.amazonaws.com/sgb-genomes/data/uniref/90/19880/HMP_2012__SRS016575__bin.12.txt
CM_periimplantitis__SP_287SPI_T016__bin.4	19883	Yes	CM_periimplantitis	SP_287SPI_T016	843164	29355	44	63.27	1.59	N/A	N/A	Candidatus Saccharibacteria	Candidatus Saccharibacteria	Candidatus Saccharibacteria	Candidatus Saccharibacteria	Bacteria	Candidatus Saccharibacteria	Candidatus Saccharibacteria	Candidatus Saccharibacteria	Candidatus Saccharibacteria	Candidatus Saccharibacteria	Candidatus Saccharibacteria	Bacteria	0.21	https://s3-eu-west-1.amazonaws.com/sgb-genomes/data/genomes/19883/CM_periimplantitis__SP_287SPI_T016__bin.4.fa	https://s3-eu-west-1.amazonaws.com/sgb-genomes/data/eggnog/19883.tsv	https://s3-eu-west-1.amazonaws.com/sgb-genomes/data/uniref/90/19883/CM_periimplantitis__SP_287SPI_T016__bin.4.txt
HMP_2012__SRS051941__bin.49	19880	Yes	HMP_2012	SRS051941	841900	95780	16	65.1	1.71	N/A	N/A	Candidatus Saccharibacteria	Candidatus Saccharibacteria	Candidatus Saccharibacteria	Candidatus Saccharibacteria	Bacteria	Candidatus Saccharibacteria	Candidatus Saccharibacteria	Candidatus Saccharibacteria	Candidatus Saccharibacteria	Candidatus Saccharibacteria	Candidatus Saccharibacteria	Bacteria	0.23	https://s3-eu-west-1.amazonaws.com/sgb-genomes/data/genomes/19880/HMP_2012__SRS051941__bin.49.fa	https://s3-eu-west-1.amazonaws.com/sgb-genomes/data/eggnog/19880.tsv	https://s3-eu-west-1.amazonaws.com/sgb-genomes/data/uniref/90/19880/HMP_2012__SRS051941__bin.49.txt
CM_periimplantitis__SP_305SPI_T016__bin.12	19883	Yes	CM_periimplantitis	SP_305SPI_T016	838127	281478	6	64.04	1.85	N/A	N/A	Candidatus Saccharibacteria	Candidatus Saccharibacteria	Candidatus Saccharibacteria	Candidatus Saccharibacteria	Bacteria	Candidatus Saccharibacteria	Candidatus Saccharibacteria	Candidatus Saccharibacteria	Candidatus Saccharibacteria	Candidatus Saccharibacteria	Candidatus Saccharibacteria	Bacteria	0.21	https://s3-eu-west-1.amazonaws.com/sgb-genomes/data/genomes/19883/CM_periimplantitis__SP_305SPI_T016__bin.12.fa	https://s3-eu-west-1.amazonaws.com/sgb-genomes/data/eggnog/19883.tsv	https://s3-eu-west-1.amazonaws.com/sgb-genomes/data/uniref/90/19883/CM_periimplantitis__SP_305SPI_T016__bin.12.txt
HMP_2012__SRS016043__bin.16	19880	Yes	HMP_2012	SRS016043	836585	61225	22	65.1	0	N/A	N/A	Candidatus Saccharibacteria	Candidatus Saccharibacteria	Candidatus Saccharibacteria	Candidatus Saccharibacteria	Bacteria	Candidatus Saccharibacteria	Candidatus Saccharibacteria	Candidatus Saccharibacteria	Candidatus Saccharibacteria	Candidatus Saccharibacteria	Candidatus Saccharibacteria	Bacteria	0.23	https://s3-eu-west-1.amazonaws.com/sgb-genomes/data/genomes/19880/HMP_2012__SRS016043__bin.16.fa	https://s3-eu-west-1.amazonaws.com/sgb-genomes/data/eggnog/19880.tsv	https://s3-eu-west-1.amazonaws.com/sgb-genomes/data/uniref/90/19880/HMP_2012__SRS016043__bin.16.txt
HMP_2012__SRS047113__bin.68	19921	Yes	HMP_2012	SRS047113	835594	35845	38	59.41	2.01	N/A	N/A	Candidatus Saccharibacteria	Candidatus Saccharibacteria	Candidatus Saccharibacteria	Candidatus Saccharibacteria	Bacteria	Candidatus Saccharibacteria	Candidatus Saccharibacteria	Candidatus Saccharibacteria	Candidatus Saccharibacteria	Candidatus Saccharibacteria	Candidatus Saccharibacteria	Bacteria	0.27	https://s3-eu-west-1.amazonaws.com/sgb-genomes/data/genomes/19921/HMP_2012__SRS047113__bin.68.fa	https://s3-eu-west-1.amazonaws.com/sgb-genomes/data/eggnog/19921.tsv	https://s3-eu-west-1.amazonaws.com/sgb-genomes/data/uniref/90/19921/HMP_2012__SRS047113__bin.68.txt
HMP_2012__SRS018157__bin.33	19921	Yes	HMP_2012	SRS018157	834040	182519	12	63.12	3.7	N/A	N/A	Candidatus Saccharibacteria	Candidatus Saccharibacteria	Candidatus Saccharibacteria	Candidatus Saccharibacteria	Bacteria	Candidatus Saccharibacteria	Candidatus Saccharibacteria	Candidatus Saccharibacteria	Candidatus Saccharibacteria	Candidatus Saccharibacteria	Candidatus Saccharibacteria	Bacteria	0.27	https://s3-eu-west-1.amazonaws.com/sgb-genomes/data/genomes/19921/HMP_2012__SRS018157__bin.33.fa	https://s3-eu-west-1.amazonaws.com/sgb-genomes/data/eggnog/19921.tsv	https://s3-eu-west-1.amazonaws.com/sgb-genomes/data/uniref/90/19921/HMP_2012__SRS018157__bin.33.txt
HMP_2012__SRS049318__bin.30	19883	Yes	HMP_2012	SRS049318	831118	42113	34	63.58	0	N/A	N/A	Candidatus Saccharibacteria	Candidatus Saccharibacteria	Candidatus Saccharibacteria	Candidatus Saccharibacteria	Bacteria	Candidatus Saccharibacteria	Candidatus Saccharibacteria	Candidatus Saccharibacteria	Candidatus Saccharibacteria	Candidatus Saccharibacteria	Candidatus Saccharibacteria	Bacteria	0.21	https://s3-eu-west-1.amazonaws.com/sgb-genomes/data/genomes/19883/HMP_2012__SRS049318__bin.30.fa	https://s3-eu-west-1.amazonaws.com/sgb-genomes/data/eggnog/19883.tsv	https://s3-eu-west-1.amazonaws.com/sgb-genomes/data/uniref/90/19883/HMP_2012__SRS049318__bin.30.txt
HMP_2012__SRS065099__bin.20	19880	Yes	HMP_2012	SRS065099	830370	264793	6	65.1	1.71	N/A	N/A	Candidatus Saccharibacteria	Candidatus Saccharibacteria	Candidatus Saccharibacteria	Candidatus Saccharibacteria	Bacteria	Candidatus Saccharibacteria	Candidatus Saccharibacteria	Candidatus Saccharibacteria	Candidatus Saccharibacteria	Candidatus Saccharibacteria	Candidatus Saccharibacteria	Bacteria	0.23	https://s3-eu-west-1.amazonaws.com/sgb-genomes/data/genomes/19880/HMP_2012__SRS065099__bin.20.fa	https://s3-eu-west-1.amazonaws.com/sgb-genomes/data/eggnog/19880.tsv	https://s3-eu-west-1.amazonaws.com/sgb-genomes/data/uniref/90/19880/HMP_2012__SRS065099__bin.20.txt
HMP_2012__SRS051244__bin.30	19880	Yes	HMP_2012	SRS051244	829658	83551	15	65.1	0.85	N/A	N/A	Candidatus Saccharibacteria	Candidatus Saccharibacteria	Candidatus Saccharibacteria	Candidatus Saccharibacteria	Bacteria	Candidatus Saccharibacteria	Candidatus Saccharibacteria	Candidatus Saccharibacteria	Candidatus Saccharibacteria	Candidatus Saccharibacteria	Candidatus Saccharibacteria	Bacteria	0.23	https://s3-eu-west-1.amazonaws.com/sgb-genomes/data/genomes/19880/HMP_2012__SRS051244__bin.30.fa	https://s3-eu-west-1.amazonaws.com/sgb-genomes/data/eggnog/19880.tsv	https://s3-eu-west-1.amazonaws.com/sgb-genomes/data/uniref/90/19880/HMP_2012__SRS051244__bin.30.txt
HMP_2012__SRS024561__bin.18	19903	Yes	HMP_2012	SRS024561	828672	49759	29	61.11	0.85	N/A	N/A	Candidatus Saccharibacteria	Candidatus Saccharibacteria	Candidatus Saccharibacteria	Candidatus Saccharibacteria	Bacteria	Candidatus Saccharibacteria	Candidatus Saccharibacteria	Candidatus Saccharibacteria	Candidatus Saccharibacteria	Candidatus Saccharibacteria	Candidatus Saccharibacteria	Bacteria	0.19	https://s3-eu-west-1.amazonaws.com/sgb-genomes/data/genomes/19903/HMP_2012__SRS024561__bin.18.fa	https://s3-eu-west-1.amazonaws.com/sgb-genomes/data/eggnog/19903.tsv	https://s3-eu-west-1.amazonaws.com/sgb-genomes/data/uniref/90/19903/HMP_2012__SRS024561__bin.18.txt
HMP_2012__SRS047634__bin.38	19921	Yes	HMP_2012	SRS047634	827646	225451	9	62.19	1.85	N/A	N/A	Candidatus Saccharibacteria	Candidatus Saccharibacteria	Candidatus Saccharibacteria	Candidatus Saccharibacteria	Bacteria	Candidatus Saccharibacteria	Candidatus Saccharibacteria	Candidatus Saccharibacteria	Candidatus Saccharibacteria	Candidatus Saccharibacteria	Candidatus Saccharibacteria	Bacteria	0.27	https://s3-eu-west-1.amazonaws.com/sgb-genomes/data/genomes/19921/HMP_2012__SRS047634__bin.38.fa	https://s3-eu-west-1.amazonaws.com/sgb-genomes/data/eggnog/19921.tsv	https://s3-eu-west-1.amazonaws.com/sgb-genomes/data/uniref/90/19921/HMP_2012__SRS047634__bin.38.txt
HMP_2012__SRS017139__bin.25	19883	Yes	HMP_2012	SRS017139	826431	81697	24	59.83	0	N/A	N/A	Candidatus Saccharibacteria	Candidatus Saccharibacteria	Candidatus Saccharibacteria	Candidatus Saccharibacteria	Bacteria	Candidatus Saccharibacteria	Candidatus Saccharibacteria	Candidatus Saccharibacteria	Candidatus Saccharibacteria	Candidatus Saccharibacteria	Candidatus Saccharibacteria	Bacteria	0.21	https://s3-eu-west-1.amazonaws.com/sgb-genomes/data/genomes/19883/HMP_2012__SRS017139__bin.25.fa	https://s3-eu-west-1.amazonaws.com/sgb-genomes/data/eggnog/19883.tsv	https://s3-eu-west-1.amazonaws.com/sgb-genomes/data/uniref/90/19883/HMP_2012__SRS017139__bin.25.txt
HMP_2012__SRS018665__bin.23	19880	Yes	HMP_2012	SRS018665	824410	371907	8	65.1	0	N/A	N/A	Candidatus Saccharibacteria	Candidatus Saccharibacteria	Candidatus Saccharibacteria	Candidatus Saccharibacteria	Bacteria	Candidatus Saccharibacteria	Candidatus Saccharibacteria	Candidatus Saccharibacteria	Candidatus Saccharibacteria	Candidatus Saccharibacteria	Candidatus Saccharibacteria	Bacteria	0.23	https://s3-eu-west-1.amazonaws.com/sgb-genomes/data/genomes/19880/HMP_2012__SRS018665__bin.23.fa	https://s3-eu-west-1.amazonaws.com/sgb-genomes/data/eggnog/19880.tsv	https://s3-eu-west-1.amazonaws.com/sgb-genomes/data/uniref/90/19880/HMP_2012__SRS018665__bin.23.txt
HMP_2012__SRS011343__bin.36	19921	Yes	HMP_2012	SRS011343	822909	182910	11	62.19	2.24	N/A	N/A	Candidatus Saccharibacteria	Candidatus Saccharibacteria	Candidatus Saccharibacteria	Candidatus Saccharibacteria	Bacteria	Candidatus Saccharibacteria	Candidatus Saccharibacteria	Candidatus Saccharibacteria	Candidatus Saccharibacteria	Candidatus Saccharibacteria	Candidatus Saccharibacteria	Bacteria	0.27	https://s3-eu-west-1.amazonaws.com/sgb-genomes/data/genomes/19921/HMP_2012__SRS011343__bin.36.fa	https://s3-eu-west-1.amazonaws.com/sgb-genomes/data/eggnog/19921.tsv	https://s3-eu-west-1.amazonaws.com/sgb-genomes/data/uniref/90/19921/HMP_2012__SRS011343__bin.36.txt
HMP_2012__SRS024355__bin.32	19880	Yes	HMP_2012	SRS024355	822752	179719	8	65.1	1.71	N/A	N/A	Candidatus Saccharibacteria	Candidatus Saccharibacteria	Candidatus Saccharibacteria	Candidatus Saccharibacteria	Bacteria	Candidatus Saccharibacteria	Candidatus Saccharibacteria	Candidatus Saccharibacteria	Candidatus Saccharibacteria	Candidatus Saccharibacteria	Candidatus Saccharibacteria	Bacteria	0.23	https://s3-eu-west-1.amazonaws.com/sgb-genomes/data/genomes/19880/HMP_2012__SRS024355__bin.32.fa	https://s3-eu-west-1.amazonaws.com/sgb-genomes/data/eggnog/19880.tsv	https://s3-eu-west-1.amazonaws.com/sgb-genomes/data/uniref/90/19880/HMP_2012__SRS024355__bin.32.txt
CM_periimplantitis__SP_384SPT_T016__bin.13	19880	Yes	CM_periimplantitis	SP_384SPT_T016	821749	144744	8	65.1	0.85	N/A	N/A	Candidatus Saccharibacteria	Candidatus Saccharibacteria	Candidatus Saccharibacteria	Candidatus Saccharibacteria	Bacteria	Candidatus Saccharibacteria	Candidatus Saccharibacteria	Candidatus Saccharibacteria	Candidatus Saccharibacteria	Candidatus Saccharibacteria	Candidatus Saccharibacteria	Bacteria	0.23	https://s3-eu-west-1.amazonaws.com/sgb-genomes/data/genomes/19880/CM_periimplantitis__SP_384SPT_T016__bin.13.fa	https://s3-eu-west-1.amazonaws.com/sgb-genomes/data/eggnog/19880.tsv	https://s3-eu-west-1.amazonaws.com/sgb-genomes/data/uniref/90/19880/CM_periimplantitis__SP_384SPT_T016__bin.13.txt
HMP_2012__SRS012285__bin.4	19883	Yes	HMP_2012	SRS012285	821681	114102	12	64.51	0.93	N/A	N/A	Candidatus Saccharibacteria	Candidatus Saccharibacteria	Candidatus Saccharibacteria	Candidatus Saccharibacteria	Bacteria	Candidatus Saccharibacteria	Candidatus Saccharibacteria	Candidatus Saccharibacteria	Candidatus Saccharibacteria	Candidatus Saccharibacteria	Candidatus Saccharibacteria	Bacteria	0.21	https://s3-eu-west-1.amazonaws.com/sgb-genomes/data/genomes/19883/HMP_2012__SRS012285__bin.4.fa	https://s3-eu-west-1.amazonaws.com/sgb-genomes/data/eggnog/19883.tsv	https://s3-eu-west-1.amazonaws.com/sgb-genomes/data/uniref/90/19883/HMP_2012__SRS012285__bin.4.txt
HMP_2012__SRS063603__bin.34	19883	Yes	HMP_2012	SRS063603	820049	77306	20	58.02	0.93	N/A	N/A	Candidatus Saccharibacteria	Candidatus Saccharibacteria	Candidatus Saccharibacteria	Candidatus Saccharibacteria	Bacteria	Candidatus Saccharibacteria	Candidatus Saccharibacteria	Candidatus Saccharibacteria	Candidatus Saccharibacteria	Candidatus Saccharibacteria	Candidatus Saccharibacteria	Bacteria	0.21	https://s3-eu-west-1.amazonaws.com/sgb-genomes/data/genomes/19883/HMP_2012__SRS063603__bin.34.fa	https://s3-eu-west-1.amazonaws.com/sgb-genomes/data/eggnog/19883.tsv	https://s3-eu-west-1.amazonaws.com/sgb-genomes/data/uniref/90/19883/HMP_2012__SRS063603__bin.34.txt
CM_cf__CF_TNFC002SA_t1M15__bin.22	19852	Yes	CM_cf	CF_TNFC002SA_t1M15	816396	23409	58	60.26	4.8	N/A	N/A	Candidatus Saccharibacteria	Candidatus Saccharibacteria	Candidatus Saccharibacteria	Candidatus Saccharibacteria	Bacteria	Candidatus Saccharibacteria	Candidatus Saccharibacteria	Candidatus Saccharibacteria	Candidatus Saccharibacteria	Candidatus Saccharibacteria	Candidatus Saccharibacteria	Bacteria	0.16	https://s3-eu-west-1.amazonaws.com/sgb-genomes/data/genomes/19852/CM_cf__CF_TNFC002SA_t1M15__bin.22.fa	https://s3-eu-west-1.amazonaws.com/sgb-genomes/data/eggnog/19852.tsv	https://s3-eu-west-1.amazonaws.com/sgb-genomes/data/uniref/90/19852/CM_cf__CF_TNFC002SA_t1M15__bin.22.txt
HMP_2012__SRS024087__bin.4	19880	Yes	HMP_2012	SRS024087	815599	153372	12	64.25	1.71	N/A	N/A	Candidatus Saccharibacteria	Candidatus Saccharibacteria	Candidatus Saccharibacteria	Candidatus Saccharibacteria	Bacteria	Candidatus Saccharibacteria	Candidatus Saccharibacteria	Candidatus Saccharibacteria	Candidatus Saccharibacteria	Candidatus Saccharibacteria	Candidatus Saccharibacteria	Bacteria	0.23	https://s3-eu-west-1.amazonaws.com/sgb-genomes/data/genomes/19880/HMP_2012__SRS024087__bin.4.fa	https://s3-eu-west-1.amazonaws.com/sgb-genomes/data/eggnog/19880.tsv	https://s3-eu-west-1.amazonaws.com/sgb-genomes/data/uniref/90/19880/HMP_2012__SRS024087__bin.4.txt
HMP_2012__SRS016746__bin.43	19880	Yes	HMP_2012	SRS016746	814956	69420	18	65.1	2.56	N/A	N/A	Candidatus Saccharibacteria	Candidatus Saccharibacteria	Candidatus Saccharibacteria	Candidatus Saccharibacteria	Bacteria	Candidatus Saccharibacteria	Candidatus Saccharibacteria	Candidatus Saccharibacteria	Candidatus Saccharibacteria	Candidatus Saccharibacteria	Candidatus Saccharibacteria	Bacteria	0.23	https://s3-eu-west-1.amazonaws.com/sgb-genomes/data/genomes/19880/HMP_2012__SRS016746__bin.43.fa	https://s3-eu-west-1.amazonaws.com/sgb-genomes/data/eggnog/19880.tsv	https://s3-eu-west-1.amazonaws.com/sgb-genomes/data/uniref/90/19880/HMP_2012__SRS016746__bin.43.txt
HMP_2012__SRS042984__bin.47	19880	Yes	HMP_2012	SRS042984	814103	104043	12	65.1	0.85	N/A	N/A	Candidatus Saccharibacteria	Candidatus Saccharibacteria	Candidatus Saccharibacteria	Candidatus Saccharibacteria	Bacteria	Candidatus Saccharibacteria	Candidatus Saccharibacteria	Candidatus Saccharibacteria	Candidatus Saccharibacteria	Candidatus Saccharibacteria	Candidatus Saccharibacteria	Bacteria	0.23	https://s3-eu-west-1.amazonaws.com/sgb-genomes/data/genomes/19880/HMP_2012__SRS042984__bin.47.fa	https://s3-eu-west-1.amazonaws.com/sgb-genomes/data/eggnog/19880.tsv	https://s3-eu-west-1.amazonaws.com/sgb-genomes/data/uniref/90/19880/HMP_2012__SRS042984__bin.47.txt
HMP_2012__SRS017139__bin.12	19880	Yes	HMP_2012	SRS017139	814031	72445	19	65.1	0	N/A	N/A	Candidatus Saccharibacteria	Candidatus Saccharibacteria	Candidatus Saccharibacteria	Candidatus Saccharibacteria	Bacteria	Candidatus Saccharibacteria	Candidatus Saccharibacteria	Candidatus Saccharibacteria	Candidatus Saccharibacteria	Candidatus Saccharibacteria	Candidatus Saccharibacteria	Bacteria	0.23	https://s3-eu-west-1.amazonaws.com/sgb-genomes/data/genomes/19880/HMP_2012__SRS017139__bin.12.fa	https://s3-eu-west-1.amazonaws.com/sgb-genomes/data/eggnog/19880.tsv	https://s3-eu-west-1.amazonaws.com/sgb-genomes/data/uniref/90/19880/HMP_2012__SRS017139__bin.12.txt
HMP_2012__SRS016331__bin.3	19921	Yes	HMP_2012	SRS016331	813438	42996	28	61.27	1.31	N/A	N/A	Candidatus Saccharibacteria	Candidatus Saccharibacteria	Candidatus Saccharibacteria	Candidatus Saccharibacteria	Bacteria	Candidatus Saccharibacteria	Candidatus Saccharibacteria	Candidatus Saccharibacteria	Candidatus Saccharibacteria	Candidatus Saccharibacteria	Candidatus Saccharibacteria	Bacteria	0.27	https://s3-eu-west-1.amazonaws.com/sgb-genomes/data/genomes/19921/HMP_2012__SRS016331__bin.3.fa	https://s3-eu-west-1.amazonaws.com/sgb-genomes/data/eggnog/19921.tsv	https://s3-eu-west-1.amazonaws.com/sgb-genomes/data/uniref/90/19921/HMP_2012__SRS016331__bin.3.txt
HMP_2012__SRS017511__bin.26	19901	Yes	HMP_2012	SRS017511	813269	58032	19	61.11	0.85	N/A	N/A	Candidatus Saccharibacteria	Candidatus Saccharibacteria	Candidatus Saccharibacteria	Candidatus Saccharibacteria	Bacteria	Candidatus Saccharibacteria	Candidatus Saccharibacteria	Candidatus Saccharibacteria	Candidatus Saccharibacteria	Candidatus Saccharibacteria	Candidatus Saccharibacteria	Bacteria	0.18	https://s3-eu-west-1.amazonaws.com/sgb-genomes/data/genomes/19901/HMP_2012__SRS017511__bin.26.fa	https://s3-eu-west-1.amazonaws.com/sgb-genomes/data/eggnog/19901.tsv	https://s3-eu-west-1.amazonaws.com/sgb-genomes/data/uniref/90/19901/HMP_2012__SRS017511__bin.26.txt
HMP_2012__SRS058808__bin.24	19884	Yes	HMP_2012	SRS058808	811886	115742	12	60.8	0.93	N/A	N/A	Candidatus Saccharibacteria	Candidatus Saccharibacteria	Candidatus Saccharibacteria	Candidatus Saccharibacteria	Bacteria	Candidatus Saccharibacteria	Candidatus Saccharibacteria	Candidatus Saccharibacteria	Candidatus Saccharibacteria	Candidatus Saccharibacteria	Candidatus Saccharibacteria	Bacteria	0.21	https://s3-eu-west-1.amazonaws.com/sgb-genomes/data/genomes/19884/HMP_2012__SRS058808__bin.24.fa	https://s3-eu-west-1.amazonaws.com/sgb-genomes/data/eggnog/19884.tsv	https://s3-eu-west-1.amazonaws.com/sgb-genomes/data/uniref/90/19884/HMP_2012__SRS058808__bin.24.txt
HMP_2012__SRS015215__bin.14	19921	Yes	HMP_2012	SRS015215	809980	49287	23	60.15	3.86	N/A	N/A	Candidatus Saccharibacteria	Candidatus Saccharibacteria	Candidatus Saccharibacteria	Candidatus Saccharibacteria	Bacteria	Candidatus Saccharibacteria	Candidatus Saccharibacteria	Candidatus Saccharibacteria	Candidatus Saccharibacteria	Candidatus Saccharibacteria	Candidatus Saccharibacteria	Bacteria	0.27	https://s3-eu-west-1.amazonaws.com/sgb-genomes/data/genomes/19921/HMP_2012__SRS015215__bin.14.fa	https://s3-eu-west-1.amazonaws.com/sgb-genomes/data/eggnog/19921.tsv	https://s3-eu-west-1.amazonaws.com/sgb-genomes/data/uniref/90/19921/HMP_2012__SRS015215__bin.14.txt
HMP_2012__SRS014578__bin.48	19902	Yes	HMP_2012	SRS014578	808127	43101	33	59.51	1.85	N/A	N/A	Candidatus Saccharibacteria	Candidatus Saccharibacteria	Candidatus Saccharibacteria	Candidatus Saccharibacteria	Bacteria	Candidatus Saccharibacteria	Candidatus Saccharibacteria	Candidatus Saccharibacteria	Candidatus Saccharibacteria	Candidatus Saccharibacteria	Candidatus Saccharibacteria	Bacteria	0.18	https://s3-eu-west-1.amazonaws.com/sgb-genomes/data/genomes/19902/HMP_2012__SRS014578__bin.48.fa	https://s3-eu-west-1.amazonaws.com/sgb-genomes/data/eggnog/19902.tsv	https://s3-eu-west-1.amazonaws.com/sgb-genomes/data/uniref/90/19902/HMP_2012__SRS014578__bin.48.txt
HMP_2012__SRS013723__bin.54	19880	Yes	HMP_2012	SRS013723	806951	85645	13	65.1	0.85	N/A	N/A	Candidatus Saccharibacteria	Candidatus Saccharibacteria	Candidatus Saccharibacteria	Candidatus Saccharibacteria	Bacteria	Candidatus Saccharibacteria	Candidatus Saccharibacteria	Candidatus Saccharibacteria	Candidatus Saccharibacteria	Candidatus Saccharibacteria	Candidatus Saccharibacteria	Bacteria	0.23	https://s3-eu-west-1.amazonaws.com/sgb-genomes/data/genomes/19880/HMP_2012__SRS013723__bin.54.fa	https://s3-eu-west-1.amazonaws.com/sgb-genomes/data/eggnog/19880.tsv	https://s3-eu-west-1.amazonaws.com/sgb-genomes/data/uniref/90/19880/HMP_2012__SRS013723__bin.54.txt
HMP_2012__SRS012285__bin.44	19880	Yes	HMP_2012	SRS012285	805787	24391	48	65.9	0	N/A	N/A	Candidatus Saccharibacteria	Candidatus Saccharibacteria	Candidatus Saccharibacteria	Candidatus Saccharibacteria	Bacteria	Candidatus Saccharibacteria	Candidatus Saccharibacteria	Candidatus Saccharibacteria	Candidatus Saccharibacteria	Candidatus Saccharibacteria	Candidatus Saccharibacteria	Bacteria	0.23	https://s3-eu-west-1.amazonaws.com/sgb-genomes/data/genomes/19880/HMP_2012__SRS012285__bin.44.fa	https://s3-eu-west-1.amazonaws.com/sgb-genomes/data/eggnog/19880.tsv	https://s3-eu-west-1.amazonaws.com/sgb-genomes/data/uniref/90/19880/HMP_2012__SRS012285__bin.44.txt
CM_cf__CF_TNFC004SA_t1M15__bin.1	19901	Yes	CM_cf	CF_TNFC004SA_t1M15	805665	48454	20	62.82	0.85	N/A	N/A	Candidatus Saccharibacteria	Candidatus Saccharibacteria	Candidatus Saccharibacteria	Candidatus Saccharibacteria	Bacteria	Candidatus Saccharibacteria	Candidatus Saccharibacteria	Candidatus Saccharibacteria	Candidatus Saccharibacteria	Candidatus Saccharibacteria	Candidatus Saccharibacteria	Bacteria	0.18	https://s3-eu-west-1.amazonaws.com/sgb-genomes/data/genomes/19901/CM_cf__CF_TNFC004SA_t1M15__bin.1.fa	https://s3-eu-west-1.amazonaws.com/sgb-genomes/data/eggnog/19901.tsv	https://s3-eu-west-1.amazonaws.com/sgb-genomes/data/uniref/90/19901/CM_cf__CF_TNFC004SA_t1M15__bin.1.txt
HMP_2012__SRS020340__bin.18	19880	Yes	HMP_2012	SRS020340	804742	54709	28	65.1	1.71	N/A	N/A	Candidatus Saccharibacteria	Candidatus Saccharibacteria	Candidatus Saccharibacteria	Candidatus Saccharibacteria	Bacteria	Candidatus Saccharibacteria	Candidatus Saccharibacteria	Candidatus Saccharibacteria	Candidatus Saccharibacteria	Candidatus Saccharibacteria	Candidatus Saccharibacteria	Bacteria	0.23	https://s3-eu-west-1.amazonaws.com/sgb-genomes/data/genomes/19880/HMP_2012__SRS020340__bin.18.fa	https://s3-eu-west-1.amazonaws.com/sgb-genomes/data/eggnog/19880.tsv	https://s3-eu-west-1.amazonaws.com/sgb-genomes/data/uniref/90/19880/HMP_2012__SRS020340__bin.18.txt
HMP_2012__SRS055450__bin.12	19880	Yes	HMP_2012	SRS055450	803772	64189	25	65.1	0.85	N/A	N/A	Candidatus Saccharibacteria	Candidatus Saccharibacteria	Candidatus Saccharibacteria	Candidatus Saccharibacteria	Bacteria	Candidatus Saccharibacteria	Candidatus Saccharibacteria	Candidatus Saccharibacteria	Candidatus Saccharibacteria	Candidatus Saccharibacteria	Candidatus Saccharibacteria	Bacteria	0.23	https://s3-eu-west-1.amazonaws.com/sgb-genomes/data/genomes/19880/HMP_2012__SRS055450__bin.12.fa	https://s3-eu-west-1.amazonaws.com/sgb-genomes/data/eggnog/19880.tsv	https://s3-eu-west-1.amazonaws.com/sgb-genomes/data/uniref/90/19880/HMP_2012__SRS055450__bin.12.txt
HMP_2012__SRS011126__bin.59	19880	Yes	HMP_2012	SRS011126	803711	139732	13	65.1	1.71	N/A	N/A	Candidatus Saccharibacteria	Candidatus Saccharibacteria	Candidatus Saccharibacteria	Candidatus Saccharibacteria	Bacteria	Candidatus Saccharibacteria	Candidatus Saccharibacteria	Candidatus Saccharibacteria	Candidatus Saccharibacteria	Candidatus Saccharibacteria	Candidatus Saccharibacteria	Bacteria	0.23	https://s3-eu-west-1.amazonaws.com/sgb-genomes/data/genomes/19880/HMP_2012__SRS011126__bin.59.fa	https://s3-eu-west-1.amazonaws.com/sgb-genomes/data/eggnog/19880.tsv	https://s3-eu-west-1.amazonaws.com/sgb-genomes/data/uniref/90/19880/HMP_2012__SRS011126__bin.59.txt
HMP_2012__SRS021477__bin.10	19880	Yes	HMP_2012	SRS021477	803661	93258	17	65.1	1.71	N/A	N/A	Candidatus Saccharibacteria	Candidatus Saccharibacteria	Candidatus Saccharibacteria	Candidatus Saccharibacteria	Bacteria	Candidatus Saccharibacteria	Candidatus Saccharibacteria	Candidatus Saccharibacteria	Candidatus Saccharibacteria	Candidatus Saccharibacteria	Candidatus Saccharibacteria	Bacteria	0.23	https://s3-eu-west-1.amazonaws.com/sgb-genomes/data/genomes/19880/HMP_2012__SRS021477__bin.10.fa	https://s3-eu-west-1.amazonaws.com/sgb-genomes/data/eggnog/19880.tsv	https://s3-eu-west-1.amazonaws.com/sgb-genomes/data/uniref/90/19880/HMP_2012__SRS021477__bin.10.txt
HMP_2012__SRS015574__bin.32	19880	Yes	HMP_2012	SRS015574	803024	53963	34	64.25	0	N/A	N/A	Candidatus Saccharibacteria	Candidatus Saccharibacteria	Candidatus Saccharibacteria	Candidatus Saccharibacteria	Bacteria	Candidatus Saccharibacteria	Candidatus Saccharibacteria	Candidatus Saccharibacteria	Candidatus Saccharibacteria	Candidatus Saccharibacteria	Candidatus Saccharibacteria	Bacteria	0.23	https://s3-eu-west-1.amazonaws.com/sgb-genomes/data/genomes/19880/HMP_2012__SRS015574__bin.32.fa	https://s3-eu-west-1.amazonaws.com/sgb-genomes/data/eggnog/19880.tsv	https://s3-eu-west-1.amazonaws.com/sgb-genomes/data/uniref/90/19880/HMP_2012__SRS015574__bin.32.txt
HMP_2012__SRS055378__bin.43	19880	Yes	HMP_2012	SRS055378	801882	85325	20	60.34	0	N/A	N/A	Candidatus Saccharibacteria	Candidatus Saccharibacteria	Candidatus Saccharibacteria	Candidatus Saccharibacteria	Bacteria	Candidatus Saccharibacteria	Candidatus Saccharibacteria	Candidatus Saccharibacteria	Candidatus Saccharibacteria	Candidatus Saccharibacteria	Candidatus Saccharibacteria	Bacteria	0.23	https://s3-eu-west-1.amazonaws.com/sgb-genomes/data/genomes/19880/HMP_2012__SRS055378__bin.43.fa	https://s3-eu-west-1.amazonaws.com/sgb-genomes/data/eggnog/19880.tsv	https://s3-eu-west-1.amazonaws.com/sgb-genomes/data/uniref/90/19880/HMP_2012__SRS055378__bin.43.txt
HMP_2012__SRS018443__bin.52	19880	Yes	HMP_2012	SRS018443	800758	261156	7	65.1	0	N/A	N/A	Candidatus Saccharibacteria	Candidatus Saccharibacteria	Candidatus Saccharibacteria	Candidatus Saccharibacteria	Bacteria	Candidatus Saccharibacteria	Candidatus Saccharibacteria	Candidatus Saccharibacteria	Candidatus Saccharibacteria	Candidatus Saccharibacteria	Candidatus Saccharibacteria	Bacteria	0.23	https://s3-eu-west-1.amazonaws.com/sgb-genomes/data/genomes/19880/HMP_2012__SRS018443__bin.52.fa	https://s3-eu-west-1.amazonaws.com/sgb-genomes/data/eggnog/19880.tsv	https://s3-eu-west-1.amazonaws.com/sgb-genomes/data/uniref/90/19880/HMP_2012__SRS018443__bin.52.txt
HMP_2012__SRS024355__bin.23	19883	Yes	HMP_2012	SRS024355	798404	79690	21	56.33	0	N/A	N/A	Candidatus Saccharibacteria	Candidatus Saccharibacteria	Candidatus Saccharibacteria	Candidatus Saccharibacteria	Bacteria	Candidatus Saccharibacteria	Candidatus Saccharibacteria	Candidatus Saccharibacteria	Candidatus Saccharibacteria	Candidatus Saccharibacteria	Candidatus Saccharibacteria	Bacteria	0.21	https://s3-eu-west-1.amazonaws.com/sgb-genomes/data/genomes/19883/HMP_2012__SRS024355__bin.23.fa	https://s3-eu-west-1.amazonaws.com/sgb-genomes/data/eggnog/19883.tsv	https://s3-eu-west-1.amazonaws.com/sgb-genomes/data/uniref/90/19883/HMP_2012__SRS024355__bin.23.txt
HMP_2012__SRS012285__bin.41	19901	Yes	HMP_2012	SRS012285	797564	101872	16	62.07	0.93	N/A	N/A	Candidatus Saccharibacteria	Candidatus Saccharibacteria	Candidatus Saccharibacteria	Candidatus Saccharibacteria	Bacteria	Candidatus Saccharibacteria	Candidatus Saccharibacteria	Candidatus Saccharibacteria	Candidatus Saccharibacteria	Candidatus Saccharibacteria	Candidatus Saccharibacteria	Bacteria	0.18	https://s3-eu-west-1.amazonaws.com/sgb-genomes/data/genomes/19901/HMP_2012__SRS012285__bin.41.fa	https://s3-eu-west-1.amazonaws.com/sgb-genomes/data/eggnog/19901.tsv	https://s3-eu-west-1.amazonaws.com/sgb-genomes/data/uniref/90/19901/HMP_2012__SRS012285__bin.41.txt
HMP_2012__SRS051930__bin.9	19883	Yes	HMP_2012	SRS051930	796880	118458	16	61.38	1.85	N/A	N/A	Candidatus Saccharibacteria	Candidatus Saccharibacteria	Candidatus Saccharibacteria	Candidatus Saccharibacteria	Bacteria	Candidatus Saccharibacteria	Candidatus Saccharibacteria	Candidatus Saccharibacteria	Candidatus Saccharibacteria	Candidatus Saccharibacteria	Candidatus Saccharibacteria	Bacteria	0.21	https://s3-eu-west-1.amazonaws.com/sgb-genomes/data/genomes/19883/HMP_2012__SRS051930__bin.9.fa	https://s3-eu-west-1.amazonaws.com/sgb-genomes/data/eggnog/19883.tsv	https://s3-eu-west-1.amazonaws.com/sgb-genomes/data/uniref/90/19883/HMP_2012__SRS051930__bin.9.txt
HMP_2012__SRS053917__bin.3	19895	Yes	HMP_2012	SRS053917	794709	217674	8	64.96	0	N/A	N/A	Candidatus Saccharibacteria	Candidatus Saccharibacteria	Candidatus Saccharibacteria	Candidatus Saccharibacteria	Bacteria	Candidatus Saccharibacteria	Candidatus Saccharibacteria	Candidatus Saccharibacteria	Candidatus Saccharibacteria	Candidatus Saccharibacteria	Candidatus Saccharibacteria	Bacteria	0.15	https://s3-eu-west-1.amazonaws.com/sgb-genomes/data/genomes/19895/HMP_2012__SRS053917__bin.3.fa	https://s3-eu-west-1.amazonaws.com/sgb-genomes/data/eggnog/19895.tsv	https://s3-eu-west-1.amazonaws.com/sgb-genomes/data/uniref/90/19895/HMP_2012__SRS053917__bin.3.txt
HMP_2012__SRS058053__bin.33	19883	Yes	HMP_2012	SRS058053	794333	28929	36	64.51	1.85	N/A	N/A	Candidatus Saccharibacteria	Candidatus Saccharibacteria	Candidatus Saccharibacteria	Candidatus Saccharibacteria	Bacteria	Candidatus Saccharibacteria	Candidatus Saccharibacteria	Candidatus Saccharibacteria	Candidatus Saccharibacteria	Candidatus Saccharibacteria	Candidatus Saccharibacteria	Bacteria	0.21	https://s3-eu-west-1.amazonaws.com/sgb-genomes/data/genomes/19883/HMP_2012__SRS058053__bin.33.fa	https://s3-eu-west-1.amazonaws.com/sgb-genomes/data/eggnog/19883.tsv	https://s3-eu-west-1.amazonaws.com/sgb-genomes/data/uniref/90/19883/HMP_2012__SRS058053__bin.33.txt
HMP_2012__SRS017139__bin.6	19921	Yes	HMP_2012	SRS017139	793731	46444	28	63.12	1.31	N/A	N/A	Candidatus Saccharibacteria	Candidatus Saccharibacteria	Candidatus Saccharibacteria	Candidatus Saccharibacteria	Bacteria	Candidatus Saccharibacteria	Candidatus Saccharibacteria	Candidatus Saccharibacteria	Candidatus Saccharibacteria	Candidatus Saccharibacteria	Candidatus Saccharibacteria	Bacteria	0.27	https://s3-eu-west-1.amazonaws.com/sgb-genomes/data/genomes/19921/HMP_2012__SRS017139__bin.6.fa	https://s3-eu-west-1.amazonaws.com/sgb-genomes/data/eggnog/19921.tsv	https://s3-eu-west-1.amazonaws.com/sgb-genomes/data/uniref/90/19921/HMP_2012__SRS017139__bin.6.txt
HMP_2012__SRS049318__bin.71	19905	Yes	HMP_2012	SRS049318	791725	17258	67	57.87	3.7	N/A	N/A	Candidatus Saccharibacteria	Candidatus Saccharibacteria	Candidatus Saccharibacteria	Candidatus Saccharibacteria	Bacteria	Candidatus Saccharibacteria	Candidatus Saccharibacteria	Candidatus Saccharibacteria	Candidatus Saccharibacteria	Candidatus Saccharibacteria	Candidatus Saccharibacteria	Bacteria	0.19	https://s3-eu-west-1.amazonaws.com/sgb-genomes/data/genomes/19905/HMP_2012__SRS049318__bin.71.fa	https://s3-eu-west-1.amazonaws.com/sgb-genomes/data/eggnog/19905.tsv	https://s3-eu-west-1.amazonaws.com/sgb-genomes/data/uniref/90/19905/HMP_2012__SRS049318__bin.71.txt
HMP_2012__SRS014476__bin.22	19883	Yes	HMP_2012	SRS014476	790439	21795	59	61.88	0.93	N/A	N/A	Candidatus Saccharibacteria	Candidatus Saccharibacteria	Candidatus Saccharibacteria	Candidatus Saccharibacteria	Bacteria	Candidatus Saccharibacteria	Candidatus Saccharibacteria	Candidatus Saccharibacteria	Candidatus Saccharibacteria	Candidatus Saccharibacteria	Candidatus Saccharibacteria	Bacteria	0.21	https://s3-eu-west-1.amazonaws.com/sgb-genomes/data/genomes/19883/HMP_2012__SRS014476__bin.22.fa	https://s3-eu-west-1.amazonaws.com/sgb-genomes/data/eggnog/19883.tsv	https://s3-eu-west-1.amazonaws.com/sgb-genomes/data/uniref/90/19883/HMP_2012__SRS014476__bin.22.txt
HMP_2012__SRS023595__bin.96	19880	Yes	HMP_2012	SRS023595	787978	69383	18	65.1	0	N/A	N/A	Candidatus Saccharibacteria	Candidatus Saccharibacteria	Candidatus Saccharibacteria	Candidatus Saccharibacteria	Bacteria	Candidatus Saccharibacteria	Candidatus Saccharibacteria	Candidatus Saccharibacteria	Candidatus Saccharibacteria	Candidatus Saccharibacteria	Candidatus Saccharibacteria	Bacteria	0.23	https://s3-eu-west-1.amazonaws.com/sgb-genomes/data/genomes/19880/HMP_2012__SRS023595__bin.96.fa	https://s3-eu-west-1.amazonaws.com/sgb-genomes/data/eggnog/19880.tsv	https://s3-eu-west-1.amazonaws.com/sgb-genomes/data/uniref/90/19880/HMP_2012__SRS023595__bin.96.txt
HMP_2012__SRS023595__bin.100	19921	Yes	HMP_2012	SRS023595	787092	62879	20	62.19	1.85	N/A	N/A	Candidatus Saccharibacteria	Candidatus Saccharibacteria	Candidatus Saccharibacteria	Candidatus Saccharibacteria	Bacteria	Candidatus Saccharibacteria	Candidatus Saccharibacteria	Candidatus Saccharibacteria	Candidatus Saccharibacteria	Candidatus Saccharibacteria	Candidatus Saccharibacteria	Bacteria	0.27	https://s3-eu-west-1.amazonaws.com/sgb-genomes/data/genomes/19921/HMP_2012__SRS023595__bin.100.fa	https://s3-eu-west-1.amazonaws.com/sgb-genomes/data/eggnog/19921.tsv	https://s3-eu-west-1.amazonaws.com/sgb-genomes/data/uniref/90/19921/HMP_2012__SRS023595__bin.100.txt
HMP_2012__SRS024561__bin.44	19880	Yes	HMP_2012	SRS024561	786349	55175	26	65.1	1.71	N/A	N/A	Candidatus Saccharibacteria	Candidatus Saccharibacteria	Candidatus Saccharibacteria	Candidatus Saccharibacteria	Bacteria	Candidatus Saccharibacteria	Candidatus Saccharibacteria	Candidatus Saccharibacteria	Candidatus Saccharibacteria	Candidatus Saccharibacteria	Candidatus Saccharibacteria	Bacteria	0.23	https://s3-eu-west-1.amazonaws.com/sgb-genomes/data/genomes/19880/HMP_2012__SRS024561__bin.44.fa	https://s3-eu-west-1.amazonaws.com/sgb-genomes/data/eggnog/19880.tsv	https://s3-eu-west-1.amazonaws.com/sgb-genomes/data/uniref/90/19880/HMP_2012__SRS024561__bin.44.txt
HMP_2012__SRS063999__bin.13	19902	Yes	HMP_2012	SRS063999	784130	27559	50	61.97	0.85	N/A	N/A	Candidatus Saccharibacteria	Candidatus Saccharibacteria	Candidatus Saccharibacteria	Candidatus Saccharibacteria	Bacteria	Candidatus Saccharibacteria	Candidatus Saccharibacteria	Candidatus Saccharibacteria	Candidatus Saccharibacteria	Candidatus Saccharibacteria	Candidatus Saccharibacteria	Bacteria	0.18	https://s3-eu-west-1.amazonaws.com/sgb-genomes/data/genomes/19902/HMP_2012__SRS063999__bin.13.fa	https://s3-eu-west-1.amazonaws.com/sgb-genomes/data/eggnog/19902.tsv	https://s3-eu-west-1.amazonaws.com/sgb-genomes/data/uniref/90/19902/HMP_2012__SRS063999__bin.13.txt
HMP_2012__SRS047634__bin.61	19883	Yes	HMP_2012	SRS047634	783832	23155	58	62.19	1.85	N/A	N/A	Candidatus Saccharibacteria	Candidatus Saccharibacteria	Candidatus Saccharibacteria	Candidatus Saccharibacteria	Bacteria	Candidatus Saccharibacteria	Candidatus Saccharibacteria	Candidatus Saccharibacteria	Candidatus Saccharibacteria	Candidatus Saccharibacteria	Candidatus Saccharibacteria	Bacteria	0.21	https://s3-eu-west-1.amazonaws.com/sgb-genomes/data/genomes/19883/HMP_2012__SRS047634__bin.61.fa	https://s3-eu-west-1.amazonaws.com/sgb-genomes/data/eggnog/19883.tsv	https://s3-eu-west-1.amazonaws.com/sgb-genomes/data/uniref/90/19883/HMP_2012__SRS047634__bin.61.txt
HMP_2012__SRS015044__bin.43	19880	Yes	HMP_2012	SRS015044	782127	153697	7	65.1	0	N/A	N/A	Candidatus Saccharibacteria	Candidatus Saccharibacteria	Candidatus Saccharibacteria	Candidatus Saccharibacteria	Bacteria	Candidatus Saccharibacteria	Candidatus Saccharibacteria	Candidatus Saccharibacteria	Candidatus Saccharibacteria	Candidatus Saccharibacteria	Candidatus Saccharibacteria	Bacteria	0.23	https://s3-eu-west-1.amazonaws.com/sgb-genomes/data/genomes/19880/HMP_2012__SRS015044__bin.43.fa	https://s3-eu-west-1.amazonaws.com/sgb-genomes/data/eggnog/19880.tsv	https://s3-eu-west-1.amazonaws.com/sgb-genomes/data/uniref/90/19880/HMP_2012__SRS015044__bin.43.txt
CM_periimplantitis__SP_304SPI_T016__bin.11	19883	Yes	CM_periimplantitis	SP_304SPI_T016	781600	205036	7	63.33	0.93	N/A	N/A	Candidatus Saccharibacteria	Candidatus Saccharibacteria	Candidatus Saccharibacteria	Candidatus Saccharibacteria	Bacteria	Candidatus Saccharibacteria	Candidatus Saccharibacteria	Candidatus Saccharibacteria	Candidatus Saccharibacteria	Candidatus Saccharibacteria	Candidatus Saccharibacteria	Bacteria	0.21	https://s3-eu-west-1.amazonaws.com/sgb-genomes/data/genomes/19883/CM_periimplantitis__SP_304SPI_T016__bin.11.fa	https://s3-eu-west-1.amazonaws.com/sgb-genomes/data/eggnog/19883.tsv	https://s3-eu-west-1.amazonaws.com/sgb-genomes/data/uniref/90/19883/CM_periimplantitis__SP_304SPI_T016__bin.11.txt
CM_periimplantitis__SP_502SPI_T016__bin.4	19903	Yes	CM_periimplantitis	SP_502SPI_T016	780667	30977	41	61.79	1.28	N/A	N/A	Candidatus Saccharibacteria	Candidatus Saccharibacteria	Candidatus Saccharibacteria	Candidatus Saccharibacteria	Bacteria	Candidatus Saccharibacteria	Candidatus Saccharibacteria	Candidatus Saccharibacteria	Candidatus Saccharibacteria	Candidatus Saccharibacteria	Candidatus Saccharibacteria	Bacteria	0.19	https://s3-eu-west-1.amazonaws.com/sgb-genomes/data/genomes/19903/CM_periimplantitis__SP_502SPI_T016__bin.4.fa	https://s3-eu-west-1.amazonaws.com/sgb-genomes/data/eggnog/19903.tsv	https://s3-eu-west-1.amazonaws.com/sgb-genomes/data/uniref/90/19903/CM_periimplantitis__SP_502SPI_T016__bin.4.txt
HMP_2012__SRS017511__bin.8	19880	Yes	HMP_2012	SRS017511	777441	19871	62	60.83	2.56	N/A	N/A	Candidatus Saccharibacteria	Candidatus Saccharibacteria	Candidatus Saccharibacteria	Candidatus Saccharibacteria	Bacteria	Candidatus Saccharibacteria	Candidatus Saccharibacteria	Candidatus Saccharibacteria	Candidatus Saccharibacteria	Candidatus Saccharibacteria	Candidatus Saccharibacteria	Bacteria	0.23	https://s3-eu-west-1.amazonaws.com/sgb-genomes/data/genomes/19880/HMP_2012__SRS017511__bin.8.fa	https://s3-eu-west-1.amazonaws.com/sgb-genomes/data/eggnog/19880.tsv	https://s3-eu-west-1.amazonaws.com/sgb-genomes/data/uniref/90/19880/HMP_2012__SRS017511__bin.8.txt
HMP_2012__SRS013252__bin.42	19880	Yes	HMP_2012	SRS013252	774377	101220	10	61.68	1.71	N/A	N/A	Candidatus Saccharibacteria	Candidatus Saccharibacteria	Candidatus Saccharibacteria	Candidatus Saccharibacteria	Bacteria	Candidatus Saccharibacteria	Candidatus Saccharibacteria	Candidatus Saccharibacteria	Candidatus Saccharibacteria	Candidatus Saccharibacteria	Candidatus Saccharibacteria	Bacteria	0.23	https://s3-eu-west-1.amazonaws.com/sgb-genomes/data/genomes/19880/HMP_2012__SRS013252__bin.42.fa	https://s3-eu-west-1.amazonaws.com/sgb-genomes/data/eggnog/19880.tsv	https://s3-eu-west-1.amazonaws.com/sgb-genomes/data/uniref/90/19880/HMP_2012__SRS013252__bin.42.txt
HMP_2012__SRS063932__bin.86	19880	Yes	HMP_2012	SRS063932	774121	109706	14	63.39	1.71	N/A	N/A	Candidatus Saccharibacteria	Candidatus Saccharibacteria	Candidatus Saccharibacteria	Candidatus Saccharibacteria	Bacteria	Candidatus Saccharibacteria	Candidatus Saccharibacteria	Candidatus Saccharibacteria	Candidatus Saccharibacteria	Candidatus Saccharibacteria	Candidatus Saccharibacteria	Bacteria	0.23	https://s3-eu-west-1.amazonaws.com/sgb-genomes/data/genomes/19880/HMP_2012__SRS063932__bin.86.fa	https://s3-eu-west-1.amazonaws.com/sgb-genomes/data/eggnog/19880.tsv	https://s3-eu-west-1.amazonaws.com/sgb-genomes/data/uniref/90/19880/HMP_2012__SRS063932__bin.86.txt
HMP_2012__SRS021477__bin.23	19883	Yes	HMP_2012	SRS021477	772650	53194	21	67.24	0	N/A	N/A	Candidatus Saccharibacteria	Candidatus Saccharibacteria	Candidatus Saccharibacteria	Candidatus Saccharibacteria	Bacteria	Candidatus Saccharibacteria	Candidatus Saccharibacteria	Candidatus Saccharibacteria	Candidatus Saccharibacteria	Candidatus Saccharibacteria	Candidatus Saccharibacteria	Bacteria	0.21	https://s3-eu-west-1.amazonaws.com/sgb-genomes/data/genomes/19883/HMP_2012__SRS021477__bin.23.fa	https://s3-eu-west-1.amazonaws.com/sgb-genomes/data/eggnog/19883.tsv	https://s3-eu-west-1.amazonaws.com/sgb-genomes/data/uniref/90/19883/HMP_2012__SRS021477__bin.23.txt
HMP_2012__SRS014476__bin.54	19880	Yes	HMP_2012	SRS014476	770226	101987	18	65.1	3.28	N/A	N/A	Candidatus Saccharibacteria	Candidatus Saccharibacteria	Candidatus Saccharibacteria	Candidatus Saccharibacteria	Bacteria	Candidatus Saccharibacteria	Candidatus Saccharibacteria	Candidatus Saccharibacteria	Candidatus Saccharibacteria	Candidatus Saccharibacteria	Candidatus Saccharibacteria	Bacteria	0.23	https://s3-eu-west-1.amazonaws.com/sgb-genomes/data/genomes/19880/HMP_2012__SRS014476__bin.54.fa	https://s3-eu-west-1.amazonaws.com/sgb-genomes/data/eggnog/19880.tsv	https://s3-eu-west-1.amazonaws.com/sgb-genomes/data/uniref/90/19880/HMP_2012__SRS014476__bin.54.txt
HMP_2012__SRS021960__bin.22	19883	Yes	HMP_2012	SRS021960	769916	41545	30	57.1	0.93	N/A	N/A	Candidatus Saccharibacteria	Candidatus Saccharibacteria	Candidatus Saccharibacteria	Candidatus Saccharibacteria	Bacteria	Candidatus Saccharibacteria	Candidatus Saccharibacteria	Candidatus Saccharibacteria	Candidatus Saccharibacteria	Candidatus Saccharibacteria	Candidatus Saccharibacteria	Bacteria	0.21	https://s3-eu-west-1.amazonaws.com/sgb-genomes/data/genomes/19883/HMP_2012__SRS021960__bin.22.fa	https://s3-eu-west-1.amazonaws.com/sgb-genomes/data/eggnog/19883.tsv	https://s3-eu-west-1.amazonaws.com/sgb-genomes/data/uniref/90/19883/HMP_2012__SRS021960__bin.22.txt
HMP_2012__SRS017691__bin.9	19883	Yes	HMP_2012	SRS017691	767903	76189	31	54.32	0	N/A	N/A	Candidatus Saccharibacteria	Candidatus Saccharibacteria	Candidatus Saccharibacteria	Candidatus Saccharibacteria	Bacteria	Candidatus Saccharibacteria	Candidatus Saccharibacteria	Candidatus Saccharibacteria	Candidatus Saccharibacteria	Candidatus Saccharibacteria	Candidatus Saccharibacteria	Bacteria	0.21	https://s3-eu-west-1.amazonaws.com/sgb-genomes/data/genomes/19883/HMP_2012__SRS017691__bin.9.fa	https://s3-eu-west-1.amazonaws.com/sgb-genomes/data/eggnog/19883.tsv	https://s3-eu-west-1.amazonaws.com/sgb-genomes/data/uniref/90/19883/HMP_2012__SRS017691__bin.9.txt
HMP_2012__SRS016746__bin.5	19904	Yes	HMP_2012	SRS016746	767306	90312	20	59.4	1.28	N/A	N/A	Candidatus Saccharibacteria	Candidatus Saccharibacteria	Candidatus Saccharibacteria	Candidatus Saccharibacteria	Bacteria	Candidatus Saccharibacteria	Candidatus Saccharibacteria	Candidatus Saccharibacteria	Candidatus Saccharibacteria	Candidatus Saccharibacteria	Candidatus Saccharibacteria	Bacteria	0.17	https://s3-eu-west-1.amazonaws.com/sgb-genomes/data/genomes/19904/HMP_2012__SRS016746__bin.5.fa	https://s3-eu-west-1.amazonaws.com/sgb-genomes/data/eggnog/19904.tsv	https://s3-eu-west-1.amazonaws.com/sgb-genomes/data/uniref/90/19904/HMP_2012__SRS016746__bin.5.txt
HMP_2012__SRS013170__bin.2	19895	Yes	HMP_2012	SRS013170	764374	92849	13	63.93	0	N/A	N/A	Candidatus Saccharibacteria	Candidatus Saccharibacteria	Candidatus Saccharibacteria	Candidatus Saccharibacteria	Bacteria	Candidatus Saccharibacteria	Candidatus Saccharibacteria	Candidatus Saccharibacteria	Candidatus Saccharibacteria	Candidatus Saccharibacteria	Candidatus Saccharibacteria	Bacteria	0.15	https://s3-eu-west-1.amazonaws.com/sgb-genomes/data/genomes/19895/HMP_2012__SRS013170__bin.2.fa	https://s3-eu-west-1.amazonaws.com/sgb-genomes/data/eggnog/19895.tsv	https://s3-eu-west-1.amazonaws.com/sgb-genomes/data/uniref/90/19895/HMP_2012__SRS013170__bin.2.txt
HMP_2012__SRS049268__bin.3	19880	Yes	HMP_2012	SRS049268	759816	149629	6	65.1	0	N/A	N/A	Candidatus Saccharibacteria	Candidatus Saccharibacteria	Candidatus Saccharibacteria	Candidatus Saccharibacteria	Bacteria	Candidatus Saccharibacteria	Candidatus Saccharibacteria	Candidatus Saccharibacteria	Candidatus Saccharibacteria	Candidatus Saccharibacteria	Candidatus Saccharibacteria	Bacteria	0.23	https://s3-eu-west-1.amazonaws.com/sgb-genomes/data/genomes/19880/HMP_2012__SRS049268__bin.3.fa	https://s3-eu-west-1.amazonaws.com/sgb-genomes/data/eggnog/19880.tsv	https://s3-eu-west-1.amazonaws.com/sgb-genomes/data/uniref/90/19880/HMP_2012__SRS049268__bin.3.txt
HMP_2012__SRS016043__bin.21	19883	Yes	HMP_2012	SRS016043	759238	15662	65	59.41	2.19	N/A	N/A	Candidatus Saccharibacteria	Candidatus Saccharibacteria	Candidatus Saccharibacteria	Candidatus Saccharibacteria	Bacteria	Candidatus Saccharibacteria	Candidatus Saccharibacteria	Candidatus Saccharibacteria	Candidatus Saccharibacteria	Candidatus Saccharibacteria	Candidatus Saccharibacteria	Bacteria	0.21	https://s3-eu-west-1.amazonaws.com/sgb-genomes/data/genomes/19883/HMP_2012__SRS016043__bin.21.fa	https://s3-eu-west-1.amazonaws.com/sgb-genomes/data/eggnog/19883.tsv	https://s3-eu-west-1.amazonaws.com/sgb-genomes/data/uniref/90/19883/HMP_2012__SRS016043__bin.21.txt
HMP_2012__SRS011126__bin.25	19883	Yes	HMP_2012	SRS011126	758773	87009	16	63.79	4.6	N/A	N/A	Candidatus Saccharibacteria	Candidatus Saccharibacteria	Candidatus Saccharibacteria	Candidatus Saccharibacteria	Bacteria	Candidatus Saccharibacteria	Candidatus Saccharibacteria	Candidatus Saccharibacteria	Candidatus Saccharibacteria	Candidatus Saccharibacteria	Candidatus Saccharibacteria	Bacteria	0.21	https://s3-eu-west-1.amazonaws.com/sgb-genomes/data/genomes/19883/HMP_2012__SRS011126__bin.25.fa	https://s3-eu-west-1.amazonaws.com/sgb-genomes/data/eggnog/19883.tsv	https://s3-eu-west-1.amazonaws.com/sgb-genomes/data/uniref/90/19883/HMP_2012__SRS011126__bin.25.txt
HMP_2012__SRS063999__bin.66	19880	Yes	HMP_2012	SRS063999	758773	23393	47	63.39	0.85	N/A	N/A	Candidatus Saccharibacteria	Candidatus Saccharibacteria	Candidatus Saccharibacteria	Candidatus Saccharibacteria	Bacteria	Candidatus Saccharibacteria	Candidatus Saccharibacteria	Candidatus Saccharibacteria	Candidatus Saccharibacteria	Candidatus Saccharibacteria	Candidatus Saccharibacteria	Bacteria	0.23	https://s3-eu-west-1.amazonaws.com/sgb-genomes/data/genomes/19880/HMP_2012__SRS063999__bin.66.fa	https://s3-eu-west-1.amazonaws.com/sgb-genomes/data/eggnog/19880.tsv	https://s3-eu-west-1.amazonaws.com/sgb-genomes/data/uniref/90/19880/HMP_2012__SRS063999__bin.66.txt
HMP_2012__SRS017691__bin.30	19880	Yes	HMP_2012	SRS017691	758297	32897	34	65.1	0	N/A	N/A	Candidatus Saccharibacteria	Candidatus Saccharibacteria	Candidatus Saccharibacteria	Candidatus Saccharibacteria	Bacteria	Candidatus Saccharibacteria	Candidatus Saccharibacteria	Candidatus Saccharibacteria	Candidatus Saccharibacteria	Candidatus Saccharibacteria	Candidatus Saccharibacteria	Bacteria	0.23	https://s3-eu-west-1.amazonaws.com/sgb-genomes/data/genomes/19880/HMP_2012__SRS017691__bin.30.fa	https://s3-eu-west-1.amazonaws.com/sgb-genomes/data/eggnog/19880.tsv	https://s3-eu-west-1.amazonaws.com/sgb-genomes/data/uniref/90/19880/HMP_2012__SRS017691__bin.30.txt
HMP_2012__SRS022149__bin.14	19886	Yes	HMP_2012	SRS022149	756426	40738	35	65.81	0	N/A	N/A	Candidatus Saccharibacteria	Candidatus Saccharibacteria	Candidatus Saccharibacteria	Candidatus Saccharibacteria	Bacteria	Candidatus Saccharibacteria	Candidatus Saccharibacteria	Candidatus Saccharibacteria	Candidatus Saccharibacteria	Candidatus Saccharibacteria	Candidatus Saccharibacteria	Bacteria	0.16	https://s3-eu-west-1.amazonaws.com/sgb-genomes/data/genomes/19886/HMP_2012__SRS022149__bin.14.fa	https://s3-eu-west-1.amazonaws.com/sgb-genomes/data/eggnog/19886.tsv	https://s3-eu-west-1.amazonaws.com/sgb-genomes/data/uniref/90/19886/HMP_2012__SRS022149__bin.14.txt
CM_periimplantitis__SP_283SPT_T016__bin.4	19892	Yes	CM_periimplantitis	SP_283SPT_T016	755751	171371	5	64.96	0	N/A	N/A	Candidatus Saccharibacteria	Candidatus Saccharibacteria	Candidatus Saccharibacteria	Candidatus Saccharibacteria	Bacteria	Candidatus Saccharibacteria	Candidatus Saccharibacteria	Candidatus Saccharibacteria	Candidatus Saccharibacteria	Candidatus Saccharibacteria	Candidatus Saccharibacteria	Bacteria	0.15	https://s3-eu-west-1.amazonaws.com/sgb-genomes/data/genomes/19892/CM_periimplantitis__SP_283SPT_T016__bin.4.fa	https://s3-eu-west-1.amazonaws.com/sgb-genomes/data/eggnog/19892.tsv	https://s3-eu-west-1.amazonaws.com/sgb-genomes/data/uniref/90/19892/CM_periimplantitis__SP_283SPT_T016__bin.4.txt
HMP_2012__SRS011343__bin.38	19883	Yes	HMP_2012	SRS011343	752235	15901	68	56.86	2.14	N/A	N/A	Candidatus Saccharibacteria	Candidatus Saccharibacteria	Candidatus Saccharibacteria	Candidatus Saccharibacteria	Bacteria	Candidatus Saccharibacteria	Candidatus Saccharibacteria	Candidatus Saccharibacteria	Candidatus Saccharibacteria	Candidatus Saccharibacteria	Candidatus Saccharibacteria	Bacteria	0.21	https://s3-eu-west-1.amazonaws.com/sgb-genomes/data/genomes/19883/HMP_2012__SRS011343__bin.38.fa	https://s3-eu-west-1.amazonaws.com/sgb-genomes/data/eggnog/19883.tsv	https://s3-eu-west-1.amazonaws.com/sgb-genomes/data/uniref/90/19883/HMP_2012__SRS011343__bin.38.txt
HMP_2012__SRS051941__bin.4	19883	Yes	HMP_2012	SRS051941	751220	53340	29	57.41	0	N/A	N/A	Candidatus Saccharibacteria	Candidatus Saccharibacteria	Candidatus Saccharibacteria	Candidatus Saccharibacteria	Bacteria	Candidatus Saccharibacteria	Candidatus Saccharibacteria	Candidatus Saccharibacteria	Candidatus Saccharibacteria	Candidatus Saccharibacteria	Candidatus Saccharibacteria	Bacteria	0.21	https://s3-eu-west-1.amazonaws.com/sgb-genomes/data/genomes/19883/HMP_2012__SRS051941__bin.4.fa	https://s3-eu-west-1.amazonaws.com/sgb-genomes/data/eggnog/19883.tsv	https://s3-eu-west-1.amazonaws.com/sgb-genomes/data/uniref/90/19883/HMP_2012__SRS051941__bin.4.txt
HMP_2012__SRS018443__bin.11	19882	Yes	HMP_2012	SRS018443	746146	61986	36	56.36	0	N/A	N/A	Candidatus Saccharibacteria	Candidatus Saccharibacteria	Candidatus Saccharibacteria	Candidatus Saccharibacteria	Bacteria	Candidatus Saccharibacteria	Candidatus Saccharibacteria	Candidatus Saccharibacteria	Candidatus Saccharibacteria	Candidatus Saccharibacteria	Candidatus Saccharibacteria	Bacteria	0.23	https://s3-eu-west-1.amazonaws.com/sgb-genomes/data/genomes/19882/HMP_2012__SRS018443__bin.11.fa	https://s3-eu-west-1.amazonaws.com/sgb-genomes/data/eggnog/19882.tsv	https://s3-eu-west-1.amazonaws.com/sgb-genomes/data/uniref/90/19882/HMP_2012__SRS018443__bin.11.txt
HMP_2012__SRS055378__bin.11	19883	Yes	HMP_2012	SRS055378	743331	40063	36	57.37	0.93	N/A	N/A	Candidatus Saccharibacteria	Candidatus Saccharibacteria	Candidatus Saccharibacteria	Candidatus Saccharibacteria	Bacteria	Candidatus Saccharibacteria	Candidatus Saccharibacteria	Candidatus Saccharibacteria	Candidatus Saccharibacteria	Candidatus Saccharibacteria	Candidatus Saccharibacteria	Bacteria	0.21	https://s3-eu-west-1.amazonaws.com/sgb-genomes/data/genomes/19883/HMP_2012__SRS055378__bin.11.fa	https://s3-eu-west-1.amazonaws.com/sgb-genomes/data/eggnog/19883.tsv	https://s3-eu-west-1.amazonaws.com/sgb-genomes/data/uniref/90/19883/HMP_2012__SRS055378__bin.11.txt
HMP_2012__SRS011152__bin.21	19849	No	HMP_2012	SRS011152	742447	22347	59	55.56	0.57	Candidatus Saccharibacteria	Candidatus Saccharibacteria	Candidatus Saccharibacteria	Candidatus Saccharibacteria	Candidatus Saccharibacteria	Candidatus Saccharibacteria	Bacteria	Candidatus Saccharibacteria	Candidatus Saccharibacteria	Candidatus Saccharibacteria	Candidatus Saccharibacteria	Candidatus Saccharibacteria	Candidatus Saccharibacteria	Bacteria	0.05	https://s3-eu-west-1.amazonaws.com/sgb-genomes/data/genomes/19849/HMP_2012__SRS011152__bin.21.fa	https://s3-eu-west-1.amazonaws.com/sgb-genomes/data/eggnog/19849.tsv	https://s3-eu-west-1.amazonaws.com/sgb-genomes/data/uniref/90/19849/HMP_2012__SRS011152__bin.21.txt
HMP_2012__SRS064774__bin.24	19860	Yes	HMP_2012	SRS064774	739188	199923	9	65.81	0.85	N/A	N/A	Candidatus Saccharibacteria	Candidatus Saccharibacteria	Candidatus Saccharibacteria	Candidatus Saccharibacteria	Bacteria	Candidatus Saccharibacteria	Candidatus Saccharibacteria	Candidatus Saccharibacteria	Candidatus Saccharibacteria	Candidatus Saccharibacteria	Candidatus Saccharibacteria	Bacteria	0.15	https://s3-eu-west-1.amazonaws.com/sgb-genomes/data/genomes/19860/HMP_2012__SRS064774__bin.24.fa	https://s3-eu-west-1.amazonaws.com/sgb-genomes/data/eggnog/19860.tsv	https://s3-eu-west-1.amazonaws.com/sgb-genomes/data/uniref/90/19860/HMP_2012__SRS064774__bin.24.txt
HMP_2012__SRS020226__bin.63	19883	Yes	HMP_2012	SRS020226	737693	69486	18	53.25	0.85	N/A	N/A	Candidatus Saccharibacteria	Candidatus Saccharibacteria	Candidatus Saccharibacteria	Candidatus Saccharibacteria	Bacteria	Candidatus Saccharibacteria	Candidatus Saccharibacteria	Candidatus Saccharibacteria	Candidatus Saccharibacteria	Candidatus Saccharibacteria	Candidatus Saccharibacteria	Bacteria	0.21	https://s3-eu-west-1.amazonaws.com/sgb-genomes/data/genomes/19883/HMP_2012__SRS020226__bin.63.fa	https://s3-eu-west-1.amazonaws.com/sgb-genomes/data/eggnog/19883.tsv	https://s3-eu-west-1.amazonaws.com/sgb-genomes/data/uniref/90/19883/HMP_2012__SRS020226__bin.63.txt
HMP_2012__SRS022536__bin.59	19893	Yes	HMP_2012	SRS022536	735906	138736	17	61.54	0	N/A	N/A	Candidatus Saccharibacteria	Candidatus Saccharibacteria	Candidatus Saccharibacteria	Candidatus Saccharibacteria	Bacteria	Candidatus Saccharibacteria	Candidatus Saccharibacteria	Candidatus Saccharibacteria	Candidatus Saccharibacteria	Candidatus Saccharibacteria	Candidatus Saccharibacteria	Bacteria	0.16	https://s3-eu-west-1.amazonaws.com/sgb-genomes/data/genomes/19893/HMP_2012__SRS022536__bin.59.fa	https://s3-eu-west-1.amazonaws.com/sgb-genomes/data/eggnog/19893.tsv	https://s3-eu-west-1.amazonaws.com/sgb-genomes/data/uniref/90/19893/HMP_2012__SRS022536__bin.59.txt
HMP_2012__SRS016319__bin.27	19867	Yes	HMP_2012	SRS016319	731239	59532	32	63.08	0.85	N/A	N/A	Candidatus Saccharibacteria	Candidatus Saccharibacteria	Candidatus Saccharibacteria	Candidatus Saccharibacteria	Bacteria	Candidatus Saccharibacteria	Candidatus Saccharibacteria	Candidatus Saccharibacteria	Candidatus Saccharibacteria	Candidatus Saccharibacteria	Candidatus Saccharibacteria	Bacteria	0.15	https://s3-eu-west-1.amazonaws.com/sgb-genomes/data/genomes/19867/HMP_2012__SRS016319__bin.27.fa	https://s3-eu-west-1.amazonaws.com/sgb-genomes/data/eggnog/19867.tsv	https://s3-eu-west-1.amazonaws.com/sgb-genomes/data/uniref/90/19867/HMP_2012__SRS016319__bin.27.txt
HMP_2012__SRS022536__bin.31	19880	Yes	HMP_2012	SRS022536	728361	471895	2	65.1	1.71	N/A	N/A	Candidatus Saccharibacteria	Candidatus Saccharibacteria	Candidatus Saccharibacteria	Candidatus Saccharibacteria	Bacteria	Candidatus Saccharibacteria	Candidatus Saccharibacteria	Candidatus Saccharibacteria	Candidatus Saccharibacteria	Candidatus Saccharibacteria	Candidatus Saccharibacteria	Bacteria	0.23	https://s3-eu-west-1.amazonaws.com/sgb-genomes/data/genomes/19880/HMP_2012__SRS022536__bin.31.fa	https://s3-eu-west-1.amazonaws.com/sgb-genomes/data/eggnog/19880.tsv	https://s3-eu-west-1.amazonaws.com/sgb-genomes/data/uniref/90/19880/HMP_2012__SRS022536__bin.31.txt
HMP_2012__SRS024441__bin.59	19860	Yes	HMP_2012	SRS024441	727686	540516	4	65.81	0.85	N/A	N/A	Candidatus Saccharibacteria	Candidatus Saccharibacteria	Candidatus Saccharibacteria	Candidatus Saccharibacteria	Bacteria	Candidatus Saccharibacteria	Candidatus Saccharibacteria	Candidatus Saccharibacteria	Candidatus Saccharibacteria	Candidatus Saccharibacteria	Candidatus Saccharibacteria	Bacteria	0.15	https://s3-eu-west-1.amazonaws.com/sgb-genomes/data/genomes/19860/HMP_2012__SRS024441__bin.59.fa	https://s3-eu-west-1.amazonaws.com/sgb-genomes/data/eggnog/19860.tsv	https://s3-eu-west-1.amazonaws.com/sgb-genomes/data/uniref/90/19860/HMP_2012__SRS024441__bin.59.txt
HMP_2012__SRS019219__bin.55	19868	Yes	HMP_2012	SRS019219	727104	147532	8	65.81	0.85	N/A	N/A	Candidatus Saccharibacteria	Candidatus Saccharibacteria	Candidatus Saccharibacteria	Candidatus Saccharibacteria	Bacteria	Candidatus Saccharibacteria	Candidatus Saccharibacteria	Candidatus Saccharibacteria	Candidatus Saccharibacteria	Candidatus Saccharibacteria	Candidatus Saccharibacteria	Bacteria	0.15	https://s3-eu-west-1.amazonaws.com/sgb-genomes/data/genomes/19868/HMP_2012__SRS019219__bin.55.fa	https://s3-eu-west-1.amazonaws.com/sgb-genomes/data/eggnog/19868.tsv	https://s3-eu-west-1.amazonaws.com/sgb-genomes/data/uniref/90/19868/HMP_2012__SRS019219__bin.55.txt
HMP_2012__SRS022602__bin.17	19888	Yes	HMP_2012	SRS022602	726998	37069	26	62.04	0	N/A	N/A	Candidatus Saccharibacteria	Candidatus Saccharibacteria	Candidatus Saccharibacteria	Candidatus Saccharibacteria	Bacteria	Candidatus Saccharibacteria	Candidatus Saccharibacteria	Candidatus Saccharibacteria	Candidatus Saccharibacteria	Candidatus Saccharibacteria	Candidatus Saccharibacteria	Bacteria	0.16	https://s3-eu-west-1.amazonaws.com/sgb-genomes/data/genomes/19888/HMP_2012__SRS022602__bin.17.fa	https://s3-eu-west-1.amazonaws.com/sgb-genomes/data/eggnog/19888.tsv	https://s3-eu-west-1.amazonaws.com/sgb-genomes/data/uniref/90/19888/HMP_2012__SRS022602__bin.17.txt
HMP_2012__SRS011343__bin.17	19848	Yes	HMP_2012	SRS011343	725755	14342	71	55.56	4.27	N/A	Candidatus Saccharibacteria	Candidatus Saccharibacteria	Candidatus Saccharibacteria	Candidatus Saccharibacteria	Candidatus Saccharibacteria	Bacteria	Candidatus Saccharibacteria	Candidatus Saccharibacteria	Candidatus Saccharibacteria	Candidatus Saccharibacteria	Candidatus Saccharibacteria	Candidatus Saccharibacteria	Bacteria	0.06	https://s3-eu-west-1.amazonaws.com/sgb-genomes/data/genomes/19848/HMP_2012__SRS011343__bin.17.fa	https://s3-eu-west-1.amazonaws.com/sgb-genomes/data/eggnog/19848.tsv	https://s3-eu-west-1.amazonaws.com/sgb-genomes/data/uniref/90/19848/HMP_2012__SRS011343__bin.17.txt
HMP_2012__SRS024087__bin.55	19893	Yes	HMP_2012	SRS024087	725199	38624	32	58.59	1.85	N/A	N/A	Candidatus Saccharibacteria	Candidatus Saccharibacteria	Candidatus Saccharibacteria	Candidatus Saccharibacteria	Bacteria	Candidatus Saccharibacteria	Candidatus Saccharibacteria	Candidatus Saccharibacteria	Candidatus Saccharibacteria	Candidatus Saccharibacteria	Candidatus Saccharibacteria	Bacteria	0.16	https://s3-eu-west-1.amazonaws.com/sgb-genomes/data/genomes/19893/HMP_2012__SRS024087__bin.55.fa	https://s3-eu-west-1.amazonaws.com/sgb-genomes/data/eggnog/19893.tsv	https://s3-eu-west-1.amazonaws.com/sgb-genomes/data/uniref/90/19893/HMP_2012__SRS024087__bin.55.txt
HMP_2012__SRS011152__bin.13	19880	Yes	HMP_2012	SRS011152	724294	63373	24	64.53	0	N/A	N/A	Candidatus Saccharibacteria	Candidatus Saccharibacteria	Candidatus Saccharibacteria	Candidatus Saccharibacteria	Bacteria	Candidatus Saccharibacteria	Candidatus Saccharibacteria	Candidatus Saccharibacteria	Candidatus Saccharibacteria	Candidatus Saccharibacteria	Candidatus Saccharibacteria	Bacteria	0.23	https://s3-eu-west-1.amazonaws.com/sgb-genomes/data/genomes/19880/HMP_2012__SRS011152__bin.13.fa	https://s3-eu-west-1.amazonaws.com/sgb-genomes/data/eggnog/19880.tsv	https://s3-eu-west-1.amazonaws.com/sgb-genomes/data/uniref/90/19880/HMP_2012__SRS011152__bin.13.txt
HMP_2012__SRS011152__bin.19	19897	Yes	HMP_2012	SRS011152	724130	36706	47	58.83	2.56	N/A	N/A	Candidatus Saccharibacteria	Candidatus Saccharibacteria	Candidatus Saccharibacteria	Candidatus Saccharibacteria	Bacteria	Candidatus Saccharibacteria	Candidatus Saccharibacteria	Candidatus Saccharibacteria	Candidatus Saccharibacteria	Candidatus Saccharibacteria	Candidatus Saccharibacteria	Bacteria	0.16	https://s3-eu-west-1.amazonaws.com/sgb-genomes/data/genomes/19897/HMP_2012__SRS011152__bin.19.fa	https://s3-eu-west-1.amazonaws.com/sgb-genomes/data/eggnog/19897.tsv	https://s3-eu-west-1.amazonaws.com/sgb-genomes/data/uniref/90/19897/HMP_2012__SRS011152__bin.19.txt
FerrettiP_2018__CA_C10035MS2597SA_t0M15__bin.21	19853	Yes	FerrettiP_2018	CA_C10035MS2597SA_t0M15	723887	229656	11	64.1	0	N/A	N/A	Candidatus Saccharibacteria	Candidatus Saccharibacteria	Candidatus Saccharibacteria	Candidatus Saccharibacteria	Bacteria	Candidatus Saccharibacteria	Candidatus Saccharibacteria	Candidatus Saccharibacteria	Candidatus Saccharibacteria	Candidatus Saccharibacteria	Candidatus Saccharibacteria	Bacteria	0.15	https://s3-eu-west-1.amazonaws.com/sgb-genomes/data/genomes/19853/FerrettiP_2018__CA_C10035MS2597SA_t0M15__bin.21.fa	https://s3-eu-west-1.amazonaws.com/sgb-genomes/data/eggnog/19853.tsv	https://s3-eu-west-1.amazonaws.com/sgb-genomes/data/uniref/90/19853/FerrettiP_2018__CA_C10035MS2597SA_t0M15__bin.21.txt
HMP_2012__SRS058808__bin.59	19880	Yes	HMP_2012	SRS058808	722685	101652	15	65.1	0	N/A	N/A	Candidatus Saccharibacteria	Candidatus Saccharibacteria	Candidatus Saccharibacteria	Candidatus Saccharibacteria	Bacteria	Candidatus Saccharibacteria	Candidatus Saccharibacteria	Candidatus Saccharibacteria	Candidatus Saccharibacteria	Candidatus Saccharibacteria	Candidatus Saccharibacteria	Bacteria	0.23	https://s3-eu-west-1.amazonaws.com/sgb-genomes/data/genomes/19880/HMP_2012__SRS058808__bin.59.fa	https://s3-eu-west-1.amazonaws.com/sgb-genomes/data/eggnog/19880.tsv	https://s3-eu-west-1.amazonaws.com/sgb-genomes/data/uniref/90/19880/HMP_2012__SRS058808__bin.59.txt
HMP_2012__SRS024375__bin.20	19860	Yes	HMP_2012	SRS024375	722466	654178	3	65.81	0.85	N/A	N/A	Candidatus Saccharibacteria	Candidatus Saccharibacteria	Candidatus Saccharibacteria	Candidatus Saccharibacteria	Bacteria	Candidatus Saccharibacteria	Candidatus Saccharibacteria	Candidatus Saccharibacteria	Candidatus Saccharibacteria	Candidatus Saccharibacteria	Candidatus Saccharibacteria	Bacteria	0.15	https://s3-eu-west-1.amazonaws.com/sgb-genomes/data/genomes/19860/HMP_2012__SRS024375__bin.20.fa	https://s3-eu-west-1.amazonaws.com/sgb-genomes/data/eggnog/19860.tsv	https://s3-eu-west-1.amazonaws.com/sgb-genomes/data/uniref/90/19860/HMP_2012__SRS024375__bin.20.txt
BritoIL_2016__W2.23.SA__bin.12	19860	Yes	BritoIL_2016	W2.23.SA	719786	12283	82	58.97	1.71	N/A	N/A	Candidatus Saccharibacteria	Candidatus Saccharibacteria	Candidatus Saccharibacteria	Candidatus Saccharibacteria	Bacteria	Candidatus Saccharibacteria	Candidatus Saccharibacteria	Candidatus Saccharibacteria	Candidatus Saccharibacteria	Candidatus Saccharibacteria	Candidatus Saccharibacteria	Bacteria	0.15	https://s3-eu-west-1.amazonaws.com/sgb-genomes/data/genomes/19860/BritoIL_2016__W2.23.SA__bin.12.fa	https://s3-eu-west-1.amazonaws.com/sgb-genomes/data/eggnog/19860.tsv	https://s3-eu-west-1.amazonaws.com/sgb-genomes/data/uniref/90/19860/BritoIL_2016__W2.23.SA__bin.12.txt
HMP_2012__SRS022149__bin.16	19880	Yes	HMP_2012	SRS022149	719749	24083	47	63.58	0.93	N/A	N/A	Candidatus Saccharibacteria	Candidatus Saccharibacteria	Candidatus Saccharibacteria	Candidatus Saccharibacteria	Bacteria	Candidatus Saccharibacteria	Candidatus Saccharibacteria	Candidatus Saccharibacteria	Candidatus Saccharibacteria	Candidatus Saccharibacteria	Candidatus Saccharibacteria	Bacteria	0.23	https://s3-eu-west-1.amazonaws.com/sgb-genomes/data/genomes/19880/HMP_2012__SRS022149__bin.16.fa	https://s3-eu-west-1.amazonaws.com/sgb-genomes/data/eggnog/19880.tsv	https://s3-eu-west-1.amazonaws.com/sgb-genomes/data/uniref/90/19880/HMP_2012__SRS022149__bin.16.txt
HMP_2012__SRS019029__bin.3	19883	Yes	HMP_2012	SRS019029	719280	16638	57	59.88	0.93	N/A	N/A	Candidatus Saccharibacteria	Candidatus Saccharibacteria	Candidatus Saccharibacteria	Candidatus Saccharibacteria	Bacteria	Candidatus Saccharibacteria	Candidatus Saccharibacteria	Candidatus Saccharibacteria	Candidatus Saccharibacteria	Candidatus Saccharibacteria	Candidatus Saccharibacteria	Bacteria	0.21	https://s3-eu-west-1.amazonaws.com/sgb-genomes/data/genomes/19883/HMP_2012__SRS019029__bin.3.fa	https://s3-eu-west-1.amazonaws.com/sgb-genomes/data/eggnog/19883.tsv	https://s3-eu-west-1.amazonaws.com/sgb-genomes/data/uniref/90/19883/HMP_2012__SRS019029__bin.3.txt
HMP_2012__SRS015055__bin.8	19859	Yes	HMP_2012	SRS015055	718615	40183	47	64.96	0.85	N/A	N/A	Candidatus Saccharibacteria	Candidatus Saccharibacteria	Candidatus Saccharibacteria	Candidatus Saccharibacteria	Bacteria	Candidatus Saccharibacteria	Candidatus Saccharibacteria	Candidatus Saccharibacteria	Candidatus Saccharibacteria	Candidatus Saccharibacteria	Candidatus Saccharibacteria	Bacteria	0.17	https://s3-eu-west-1.amazonaws.com/sgb-genomes/data/genomes/19859/HMP_2012__SRS015055__bin.8.fa	https://s3-eu-west-1.amazonaws.com/sgb-genomes/data/eggnog/19859.tsv	https://s3-eu-west-1.amazonaws.com/sgb-genomes/data/uniref/90/19859/HMP_2012__SRS015055__bin.8.txt
HMP_2012__SRS020226__bin.38	19880	Yes	HMP_2012	SRS020226	715873	65927	29	63.39	0	N/A	N/A	Candidatus Saccharibacteria	Candidatus Saccharibacteria	Candidatus Saccharibacteria	Candidatus Saccharibacteria	Bacteria	Candidatus Saccharibacteria	Candidatus Saccharibacteria	Candidatus Saccharibacteria	Candidatus Saccharibacteria	Candidatus Saccharibacteria	Candidatus Saccharibacteria	Bacteria	0.23	https://s3-eu-west-1.amazonaws.com/sgb-genomes/data/genomes/19880/HMP_2012__SRS020226__bin.38.fa	https://s3-eu-west-1.amazonaws.com/sgb-genomes/data/eggnog/19880.tsv	https://s3-eu-west-1.amazonaws.com/sgb-genomes/data/uniref/90/19880/HMP_2012__SRS020226__bin.38.txt
HMP_2012__SRS011343__bin.11	19880	Yes	HMP_2012	SRS011343	715129	18935	56	63.39	1.71	N/A	N/A	Candidatus Saccharibacteria	Candidatus Saccharibacteria	Candidatus Saccharibacteria	Candidatus Saccharibacteria	Bacteria	Candidatus Saccharibacteria	Candidatus Saccharibacteria	Candidatus Saccharibacteria	Candidatus Saccharibacteria	Candidatus Saccharibacteria	Candidatus Saccharibacteria	Bacteria	0.23	https://s3-eu-west-1.amazonaws.com/sgb-genomes/data/genomes/19880/HMP_2012__SRS011343__bin.11.fa	https://s3-eu-west-1.amazonaws.com/sgb-genomes/data/eggnog/19880.tsv	https://s3-eu-west-1.amazonaws.com/sgb-genomes/data/uniref/90/19880/HMP_2012__SRS011343__bin.11.txt
CM_periimplantitis__SP_344SPT_T016__bin.52	19883	Yes	CM_periimplantitis	SP_344SPT_T016	713652	50838	19	57.1	0.93	N/A	N/A	Candidatus Saccharibacteria	Candidatus Saccharibacteria	Candidatus Saccharibacteria	Candidatus Saccharibacteria	Bacteria	Candidatus Saccharibacteria	Candidatus Saccharibacteria	Candidatus Saccharibacteria	Candidatus Saccharibacteria	Candidatus Saccharibacteria	Candidatus Saccharibacteria	Bacteria	0.21	https://s3-eu-west-1.amazonaws.com/sgb-genomes/data/genomes/19883/CM_periimplantitis__SP_344SPT_T016__bin.52.fa	https://s3-eu-west-1.amazonaws.com/sgb-genomes/data/eggnog/19883.tsv	https://s3-eu-west-1.amazonaws.com/sgb-genomes/data/uniref/90/19883/CM_periimplantitis__SP_344SPT_T016__bin.52.txt
HMP_2012__SRS049268__bin.15	19901	Yes	HMP_2012	SRS049268	713437	27455	42	57.87	0.93	N/A	N/A	Candidatus Saccharibacteria	Candidatus Saccharibacteria	Candidatus Saccharibacteria	Candidatus Saccharibacteria	Bacteria	Candidatus Saccharibacteria	Candidatus Saccharibacteria	Candidatus Saccharibacteria	Candidatus Saccharibacteria	Candidatus Saccharibacteria	Candidatus Saccharibacteria	Bacteria	0.18	https://s3-eu-west-1.amazonaws.com/sgb-genomes/data/genomes/19901/HMP_2012__SRS049268__bin.15.fa	https://s3-eu-west-1.amazonaws.com/sgb-genomes/data/eggnog/19901.tsv	https://s3-eu-west-1.amazonaws.com/sgb-genomes/data/uniref/90/19901/HMP_2012__SRS049268__bin.15.txt
HMP_2012__SRS019607__bin.71	19854	Yes	HMP_2012	SRS019607	712753	186065	12	60.68	0	N/A	N/A	Candidatus Saccharibacteria	Candidatus Saccharibacteria	Candidatus Saccharibacteria	Candidatus Saccharibacteria	Bacteria	Candidatus Saccharibacteria	Candidatus Saccharibacteria	Candidatus Saccharibacteria	Candidatus Saccharibacteria	Candidatus Saccharibacteria	Candidatus Saccharibacteria	Bacteria	0.15	https://s3-eu-west-1.amazonaws.com/sgb-genomes/data/genomes/19854/HMP_2012__SRS019607__bin.71.fa	https://s3-eu-west-1.amazonaws.com/sgb-genomes/data/eggnog/19854.tsv	https://s3-eu-west-1.amazonaws.com/sgb-genomes/data/uniref/90/19854/HMP_2012__SRS019607__bin.71.txt
HMP_2012__SRS063603__bin.23	19880	Yes	HMP_2012	SRS063603	710113	92826	13	65.1	0	N/A	N/A	Candidatus Saccharibacteria	Candidatus Saccharibacteria	Candidatus Saccharibacteria	Candidatus Saccharibacteria	Bacteria	Candidatus Saccharibacteria	Candidatus Saccharibacteria	Candidatus Saccharibacteria	Candidatus Saccharibacteria	Candidatus Saccharibacteria	Candidatus Saccharibacteria	Bacteria	0.23	https://s3-eu-west-1.amazonaws.com/sgb-genomes/data/genomes/19880/HMP_2012__SRS063603__bin.23.fa	https://s3-eu-west-1.amazonaws.com/sgb-genomes/data/eggnog/19880.tsv	https://s3-eu-west-1.amazonaws.com/sgb-genomes/data/uniref/90/19880/HMP_2012__SRS063603__bin.23.txt
HMP_2012__SRS042984__bin.45	19886	Yes	HMP_2012	SRS042984	705492	22799	40	60.33	0	N/A	N/A	Candidatus Saccharibacteria	Candidatus Saccharibacteria	Candidatus Saccharibacteria	Candidatus Saccharibacteria	Bacteria	Candidatus Saccharibacteria	Candidatus Saccharibacteria	Candidatus Saccharibacteria	Candidatus Saccharibacteria	Candidatus Saccharibacteria	Candidatus Saccharibacteria	Bacteria	0.16	https://s3-eu-west-1.amazonaws.com/sgb-genomes/data/genomes/19886/HMP_2012__SRS042984__bin.45.fa	https://s3-eu-west-1.amazonaws.com/sgb-genomes/data/eggnog/19886.tsv	https://s3-eu-west-1.amazonaws.com/sgb-genomes/data/uniref/90/19886/HMP_2012__SRS042984__bin.45.txt
CM_periimplantitis__SP_105SPI_T016__bin.1	19883	Yes	CM_periimplantitis	SP_105SPI_T016	701765	19668	59	54.32	0.93	N/A	N/A	Candidatus Saccharibacteria	Candidatus Saccharibacteria	Candidatus Saccharibacteria	Candidatus Saccharibacteria	Bacteria	Candidatus Saccharibacteria	Candidatus Saccharibacteria	Candidatus Saccharibacteria	Candidatus Saccharibacteria	Candidatus Saccharibacteria	Candidatus Saccharibacteria	Bacteria	0.21	https://s3-eu-west-1.amazonaws.com/sgb-genomes/data/genomes/19883/CM_periimplantitis__SP_105SPI_T016__bin.1.fa	https://s3-eu-west-1.amazonaws.com/sgb-genomes/data/eggnog/19883.tsv	https://s3-eu-west-1.amazonaws.com/sgb-genomes/data/uniref/90/19883/CM_periimplantitis__SP_105SPI_T016__bin.1.txt
HMP_2012__SRS053854__bin.8	19860	Yes	HMP_2012	SRS053854	701764	158626	6	65.81	0	N/A	N/A	Candidatus Saccharibacteria	Candidatus Saccharibacteria	Candidatus Saccharibacteria	Candidatus Saccharibacteria	Bacteria	Candidatus Saccharibacteria	Candidatus Saccharibacteria	Candidatus Saccharibacteria	Candidatus Saccharibacteria	Candidatus Saccharibacteria	Candidatus Saccharibacteria	Bacteria	0.15	https://s3-eu-west-1.amazonaws.com/sgb-genomes/data/genomes/19860/HMP_2012__SRS053854__bin.8.fa	https://s3-eu-west-1.amazonaws.com/sgb-genomes/data/eggnog/19860.tsv	https://s3-eu-west-1.amazonaws.com/sgb-genomes/data/uniref/90/19860/HMP_2012__SRS053854__bin.8.txt
CM_periimplantitis__SP_105SPI_T016__bin.7	19880	Yes	CM_periimplantitis	SP_105SPI_T016	701051	12050	84	60.83	1.28	N/A	N/A	Candidatus Saccharibacteria	Candidatus Saccharibacteria	Candidatus Saccharibacteria	Candidatus Saccharibacteria	Bacteria	Candidatus Saccharibacteria	Candidatus Saccharibacteria	Candidatus Saccharibacteria	Candidatus Saccharibacteria	Candidatus Saccharibacteria	Candidatus Saccharibacteria	Bacteria	0.23	https://s3-eu-west-1.amazonaws.com/sgb-genomes/data/genomes/19880/CM_periimplantitis__SP_105SPI_T016__bin.7.fa	https://s3-eu-west-1.amazonaws.com/sgb-genomes/data/eggnog/19880.tsv	https://s3-eu-west-1.amazonaws.com/sgb-genomes/data/uniref/90/19880/CM_periimplantitis__SP_105SPI_T016__bin.7.txt
HMP_2012__SRS024381__bin.37	19880	Yes	HMP_2012	SRS024381	698983	7426	122	57.87	3.42	N/A	N/A	Candidatus Saccharibacteria	Candidatus Saccharibacteria	Candidatus Saccharibacteria	Candidatus Saccharibacteria	Bacteria	Candidatus Saccharibacteria	Candidatus Saccharibacteria	Candidatus Saccharibacteria	Candidatus Saccharibacteria	Candidatus Saccharibacteria	Candidatus Saccharibacteria	Bacteria	0.23	https://s3-eu-west-1.amazonaws.com/sgb-genomes/data/genomes/19880/HMP_2012__SRS024381__bin.37.fa	https://s3-eu-west-1.amazonaws.com/sgb-genomes/data/eggnog/19880.tsv	https://s3-eu-west-1.amazonaws.com/sgb-genomes/data/uniref/90/19880/HMP_2012__SRS024381__bin.37.txt
HMP_2012__SRS047219__bin.28	19856	Yes	HMP_2012	SRS047219	697395	40074	25	59.1	0	N/A	N/A	Candidatus Saccharibacteria	Candidatus Saccharibacteria	Candidatus Saccharibacteria	Candidatus Saccharibacteria	Bacteria	Candidatus Saccharibacteria	Candidatus Saccharibacteria	Candidatus Saccharibacteria	Candidatus Saccharibacteria	Candidatus Saccharibacteria	Candidatus Saccharibacteria	Bacteria	0.16	https://s3-eu-west-1.amazonaws.com/sgb-genomes/data/genomes/19856/HMP_2012__SRS047219__bin.28.fa	https://s3-eu-west-1.amazonaws.com/sgb-genomes/data/eggnog/19856.tsv	https://s3-eu-west-1.amazonaws.com/sgb-genomes/data/uniref/90/19856/HMP_2012__SRS047219__bin.28.txt
HMP_2012__SRS020340__bin.39	19889	Yes	HMP_2012	SRS020340	692778	24900	38	60.21	0.85	N/A	N/A	Candidatus Saccharibacteria	Candidatus Saccharibacteria	Candidatus Saccharibacteria	Candidatus Saccharibacteria	Bacteria	Candidatus Saccharibacteria	Candidatus Saccharibacteria	Candidatus Saccharibacteria	Candidatus Saccharibacteria	Candidatus Saccharibacteria	Candidatus Saccharibacteria	Bacteria	0.15	https://s3-eu-west-1.amazonaws.com/sgb-genomes/data/genomes/19889/HMP_2012__SRS020340__bin.39.fa	https://s3-eu-west-1.amazonaws.com/sgb-genomes/data/eggnog/19889.tsv	https://s3-eu-west-1.amazonaws.com/sgb-genomes/data/uniref/90/19889/HMP_2012__SRS020340__bin.39.txt
FerrettiP_2018__CA_C10024MS2403SA_t0M15__bin.10	19860	Yes	FerrettiP_2018	CA_C10024MS2403SA_t0M15	692620	20205	52	63.25	0	N/A	N/A	Candidatus Saccharibacteria	Candidatus Saccharibacteria	Candidatus Saccharibacteria	Candidatus Saccharibacteria	Bacteria	Candidatus Saccharibacteria	Candidatus Saccharibacteria	Candidatus Saccharibacteria	Candidatus Saccharibacteria	Candidatus Saccharibacteria	Candidatus Saccharibacteria	Bacteria	0.15	https://s3-eu-west-1.amazonaws.com/sgb-genomes/data/genomes/19860/FerrettiP_2018__CA_C10024MS2403SA_t0M15__bin.10.fa	https://s3-eu-west-1.amazonaws.com/sgb-genomes/data/eggnog/19860.tsv	https://s3-eu-west-1.amazonaws.com/sgb-genomes/data/uniref/90/19860/FerrettiP_2018__CA_C10024MS2403SA_t0M15__bin.10.txt
HMP_2012__SRS019029__bin.21	19880	Yes	HMP_2012	SRS019029	691756	92394	11	64.25	0.85	N/A	N/A	Candidatus Saccharibacteria	Candidatus Saccharibacteria	Candidatus Saccharibacteria	Candidatus Saccharibacteria	Bacteria	Candidatus Saccharibacteria	Candidatus Saccharibacteria	Candidatus Saccharibacteria	Candidatus Saccharibacteria	Candidatus Saccharibacteria	Candidatus Saccharibacteria	Bacteria	0.23	https://s3-eu-west-1.amazonaws.com/sgb-genomes/data/genomes/19880/HMP_2012__SRS019029__bin.21.fa	https://s3-eu-west-1.amazonaws.com/sgb-genomes/data/eggnog/19880.tsv	https://s3-eu-west-1.amazonaws.com/sgb-genomes/data/uniref/90/19880/HMP_2012__SRS019029__bin.21.txt
HMP_2012__SRS013252__bin.9	19887	Yes	HMP_2012	SRS013252	691314	140648	11	60.74	0	N/A	N/A	Candidatus Saccharibacteria	Candidatus Saccharibacteria	Candidatus Saccharibacteria	Candidatus Saccharibacteria	Bacteria	Candidatus Saccharibacteria	Candidatus Saccharibacteria	Candidatus Saccharibacteria	Candidatus Saccharibacteria	Candidatus Saccharibacteria	Candidatus Saccharibacteria	Bacteria	0.16	https://s3-eu-west-1.amazonaws.com/sgb-genomes/data/genomes/19887/HMP_2012__SRS013252__bin.9.fa	https://s3-eu-west-1.amazonaws.com/sgb-genomes/data/eggnog/19887.tsv	https://s3-eu-west-1.amazonaws.com/sgb-genomes/data/uniref/90/19887/HMP_2012__SRS013252__bin.9.txt
HMP_2012__SRS045197__bin.56	19880	Yes	HMP_2012	SRS045197	690705	19783	59	62.54	0	N/A	N/A	Candidatus Saccharibacteria	Candidatus Saccharibacteria	Candidatus Saccharibacteria	Candidatus Saccharibacteria	Bacteria	Candidatus Saccharibacteria	Candidatus Saccharibacteria	Candidatus Saccharibacteria	Candidatus Saccharibacteria	Candidatus Saccharibacteria	Candidatus Saccharibacteria	Bacteria	0.23	https://s3-eu-west-1.amazonaws.com/sgb-genomes/data/genomes/19880/HMP_2012__SRS045197__bin.56.fa	https://s3-eu-west-1.amazonaws.com/sgb-genomes/data/eggnog/19880.tsv	https://s3-eu-west-1.amazonaws.com/sgb-genomes/data/uniref/90/19880/HMP_2012__SRS045197__bin.56.txt
HMP_2012__SRS022602__bin.58	19921	Yes	HMP_2012	SRS022602	687820	106920	16	52.56	1.85	N/A	N/A	Candidatus Saccharibacteria	Candidatus Saccharibacteria	Candidatus Saccharibacteria	Candidatus Saccharibacteria	Bacteria	Candidatus Saccharibacteria	Candidatus Saccharibacteria	Candidatus Saccharibacteria	Candidatus Saccharibacteria	Candidatus Saccharibacteria	Candidatus Saccharibacteria	Bacteria	0.27	https://s3-eu-west-1.amazonaws.com/sgb-genomes/data/genomes/19921/HMP_2012__SRS022602__bin.58.fa	https://s3-eu-west-1.amazonaws.com/sgb-genomes/data/eggnog/19921.tsv	https://s3-eu-west-1.amazonaws.com/sgb-genomes/data/uniref/90/19921/HMP_2012__SRS022602__bin.58.txt
HMP_2012__SRS017808__bin.23	19855	Yes	HMP_2012	SRS017808	685393	21646	63	58.97	0.85	N/A	N/A	Candidatus Saccharibacteria	Candidatus Saccharibacteria	Candidatus Saccharibacteria	Candidatus Saccharibacteria	Bacteria	Candidatus Saccharibacteria	Candidatus Saccharibacteria	Candidatus Saccharibacteria	Candidatus Saccharibacteria	Candidatus Saccharibacteria	Candidatus Saccharibacteria	Bacteria	0.15	https://s3-eu-west-1.amazonaws.com/sgb-genomes/data/genomes/19855/HMP_2012__SRS017808__bin.23.fa	https://s3-eu-west-1.amazonaws.com/sgb-genomes/data/eggnog/19855.tsv	https://s3-eu-west-1.amazonaws.com/sgb-genomes/data/uniref/90/19855/HMP_2012__SRS017808__bin.23.txt
HMP_2012__SRS024649__bin.8	19880	Yes	HMP_2012	SRS024649	683261	162434	6	65.1	0	N/A	N/A	Candidatus Saccharibacteria	Candidatus Saccharibacteria	Candidatus Saccharibacteria	Candidatus Saccharibacteria	Bacteria	Candidatus Saccharibacteria	Candidatus Saccharibacteria	Candidatus Saccharibacteria	Candidatus Saccharibacteria	Candidatus Saccharibacteria	Candidatus Saccharibacteria	Bacteria	0.23	https://s3-eu-west-1.amazonaws.com/sgb-genomes/data/genomes/19880/HMP_2012__SRS024649__bin.8.fa	https://s3-eu-west-1.amazonaws.com/sgb-genomes/data/eggnog/19880.tsv	https://s3-eu-west-1.amazonaws.com/sgb-genomes/data/uniref/90/19880/HMP_2012__SRS024649__bin.8.txt
HMP_2012__SRS065099__bin.13	19883	Yes	HMP_2012	SRS065099	681404	8622	96	51.2	1.85	N/A	N/A	Candidatus Saccharibacteria	Candidatus Saccharibacteria	Candidatus Saccharibacteria	Candidatus Saccharibacteria	Bacteria	Candidatus Saccharibacteria	Candidatus Saccharibacteria	Candidatus Saccharibacteria	Candidatus Saccharibacteria	Candidatus Saccharibacteria	Candidatus Saccharibacteria	Bacteria	0.21	https://s3-eu-west-1.amazonaws.com/sgb-genomes/data/genomes/19883/HMP_2012__SRS065099__bin.13.fa	https://s3-eu-west-1.amazonaws.com/sgb-genomes/data/eggnog/19883.tsv	https://s3-eu-west-1.amazonaws.com/sgb-genomes/data/uniref/90/19883/HMP_2012__SRS065099__bin.13.txt
CM_cf__CF_TNFC023IS_t3M15__bin.28	19850	Yes	CM_cf	CF_TNFC023IS_t3M15	679999	195479	3	65.53	0	N/A	N/A	Candidatus Saccharibacteria	Candidatus Saccharibacteria	Candidatus Saccharibacteria	Candidatus Saccharibacteria	Bacteria	Candidatus Saccharibacteria	Candidatus Saccharibacteria	Candidatus Saccharibacteria	Candidatus Saccharibacteria	Candidatus Saccharibacteria	Candidatus Saccharibacteria	Bacteria	0.15	https://s3-eu-west-1.amazonaws.com/sgb-genomes/data/genomes/19850/CM_cf__CF_TNFC023IS_t3M15__bin.28.fa	https://s3-eu-west-1.amazonaws.com/sgb-genomes/data/eggnog/19850.tsv	https://s3-eu-west-1.amazonaws.com/sgb-genomes/data/uniref/90/19850/CM_cf__CF_TNFC023IS_t3M15__bin.28.txt
HMP_2012__SRS014476__bin.32	19906	Yes	HMP_2012	SRS014476	674110	12645	80	50.65	0.46	N/A	N/A	Candidatus Saccharibacteria	Candidatus Saccharibacteria	Candidatus Saccharibacteria	Candidatus Saccharibacteria	Bacteria	Candidatus Saccharibacteria	Candidatus Saccharibacteria	Candidatus Saccharibacteria	Candidatus Saccharibacteria	Candidatus Saccharibacteria	Candidatus Saccharibacteria	Bacteria	0.18	https://s3-eu-west-1.amazonaws.com/sgb-genomes/data/genomes/19906/HMP_2012__SRS014476__bin.32.fa	https://s3-eu-west-1.amazonaws.com/sgb-genomes/data/eggnog/19906.tsv	https://s3-eu-west-1.amazonaws.com/sgb-genomes/data/uniref/90/19906/HMP_2012__SRS014476__bin.32.txt
HMP_2012__SRS013252__bin.46	19883	Yes	HMP_2012	SRS013252	673305	11858	78	63.98	0	N/A	N/A	Candidatus Saccharibacteria	Candidatus Saccharibacteria	Candidatus Saccharibacteria	Candidatus Saccharibacteria	Bacteria	Candidatus Saccharibacteria	Candidatus Saccharibacteria	Candidatus Saccharibacteria	Candidatus Saccharibacteria	Candidatus Saccharibacteria	Candidatus Saccharibacteria	Bacteria	0.21	https://s3-eu-west-1.amazonaws.com/sgb-genomes/data/genomes/19883/HMP_2012__SRS013252__bin.46.fa	https://s3-eu-west-1.amazonaws.com/sgb-genomes/data/eggnog/19883.tsv	https://s3-eu-west-1.amazonaws.com/sgb-genomes/data/uniref/90/19883/HMP_2012__SRS013252__bin.46.txt
HMP_2012__SRS020856__bin.8	19860	Yes	HMP_2012	SRS020856	668855	15836	61	59.69	0	N/A	N/A	Candidatus Saccharibacteria	Candidatus Saccharibacteria	Candidatus Saccharibacteria	Candidatus Saccharibacteria	Bacteria	Candidatus Saccharibacteria	Candidatus Saccharibacteria	Candidatus Saccharibacteria	Candidatus Saccharibacteria	Candidatus Saccharibacteria	Candidatus Saccharibacteria	Bacteria	0.15	https://s3-eu-west-1.amazonaws.com/sgb-genomes/data/genomes/19860/HMP_2012__SRS020856__bin.8.fa	https://s3-eu-west-1.amazonaws.com/sgb-genomes/data/eggnog/19860.tsv	https://s3-eu-west-1.amazonaws.com/sgb-genomes/data/uniref/90/19860/HMP_2012__SRS020856__bin.8.txt
HMP_2012__SRS011126__bin.73	19905	Yes	HMP_2012	SRS011126	666909	20206	52	50.28	0	N/A	N/A	Candidatus Saccharibacteria	Candidatus Saccharibacteria	Candidatus Saccharibacteria	Candidatus Saccharibacteria	Bacteria	Candidatus Saccharibacteria	Candidatus Saccharibacteria	Candidatus Saccharibacteria	Candidatus Saccharibacteria	Candidatus Saccharibacteria	Candidatus Saccharibacteria	Bacteria	0.19	https://s3-eu-west-1.amazonaws.com/sgb-genomes/data/genomes/19905/HMP_2012__SRS011126__bin.73.fa	https://s3-eu-west-1.amazonaws.com/sgb-genomes/data/eggnog/19905.tsv	https://s3-eu-west-1.amazonaws.com/sgb-genomes/data/uniref/90/19905/HMP_2012__SRS011126__bin.73.txt
HMP_2012__SRS044373__bin.6	19850	Yes	HMP_2012	SRS044373	664967	370693	8	64.96	0	N/A	N/A	Candidatus Saccharibacteria	Candidatus Saccharibacteria	Candidatus Saccharibacteria	Candidatus Saccharibacteria	Bacteria	Candidatus Saccharibacteria	Candidatus Saccharibacteria	Candidatus Saccharibacteria	Candidatus Saccharibacteria	Candidatus Saccharibacteria	Candidatus Saccharibacteria	Bacteria	0.15	https://s3-eu-west-1.amazonaws.com/sgb-genomes/data/genomes/19850/HMP_2012__SRS044373__bin.6.fa	https://s3-eu-west-1.amazonaws.com/sgb-genomes/data/eggnog/19850.tsv	https://s3-eu-west-1.amazonaws.com/sgb-genomes/data/uniref/90/19850/HMP_2012__SRS044373__bin.6.txt
HMP_2012__SRS011255__bin.47	19881	Yes	HMP_2012	SRS011255	664374	17332	51	55.67	2.01	N/A	N/A	Candidatus Saccharibacteria	Candidatus Saccharibacteria	Candidatus Saccharibacteria	Candidatus Saccharibacteria	Bacteria	Candidatus Saccharibacteria	Candidatus Saccharibacteria	Candidatus Saccharibacteria	Candidatus Saccharibacteria	Candidatus Saccharibacteria	Candidatus Saccharibacteria	Bacteria	0.24	https://s3-eu-west-1.amazonaws.com/sgb-genomes/data/genomes/19881/HMP_2012__SRS011255__bin.47.fa	https://s3-eu-west-1.amazonaws.com/sgb-genomes/data/eggnog/19881.tsv	https://s3-eu-west-1.amazonaws.com/sgb-genomes/data/uniref/90/19881/HMP_2012__SRS011255__bin.47.txt
HMP_2012__SRS019128__bin.27	19883	Yes	HMP_2012	SRS019128	664372	15231	58	53.69	1.85	N/A	N/A	Candidatus Saccharibacteria	Candidatus Saccharibacteria	Candidatus Saccharibacteria	Candidatus Saccharibacteria	Bacteria	Candidatus Saccharibacteria	Candidatus Saccharibacteria	Candidatus Saccharibacteria	Candidatus Saccharibacteria	Candidatus Saccharibacteria	Candidatus Saccharibacteria	Bacteria	0.21	https://s3-eu-west-1.amazonaws.com/sgb-genomes/data/genomes/19883/HMP_2012__SRS019128__bin.27.fa	https://s3-eu-west-1.amazonaws.com/sgb-genomes/data/eggnog/19883.tsv	https://s3-eu-west-1.amazonaws.com/sgb-genomes/data/uniref/90/19883/HMP_2012__SRS019128__bin.27.txt
HMP_2012__SRS053917__bin.36	19921	Yes	HMP_2012	SRS053917	664276	15422	60	55.81	1.98	N/A	N/A	Candidatus Saccharibacteria	Candidatus Saccharibacteria	Candidatus Saccharibacteria	Candidatus Saccharibacteria	Bacteria	Candidatus Saccharibacteria	Candidatus Saccharibacteria	Candidatus Saccharibacteria	Candidatus Saccharibacteria	Candidatus Saccharibacteria	Candidatus Saccharibacteria	Bacteria	0.27	https://s3-eu-west-1.amazonaws.com/sgb-genomes/data/genomes/19921/HMP_2012__SRS053917__bin.36.fa	https://s3-eu-west-1.amazonaws.com/sgb-genomes/data/eggnog/19921.tsv	https://s3-eu-west-1.amazonaws.com/sgb-genomes/data/uniref/90/19921/HMP_2012__SRS053917__bin.36.txt
HMP_2012__SRS023958__bin.47	19850	Yes	HMP_2012	SRS023958	659495	49483	26	63.82	0	N/A	N/A	Candidatus Saccharibacteria	Candidatus Saccharibacteria	Candidatus Saccharibacteria	Candidatus Saccharibacteria	Bacteria	Candidatus Saccharibacteria	Candidatus Saccharibacteria	Candidatus Saccharibacteria	Candidatus Saccharibacteria	Candidatus Saccharibacteria	Candidatus Saccharibacteria	Bacteria	0.15	https://s3-eu-west-1.amazonaws.com/sgb-genomes/data/genomes/19850/HMP_2012__SRS023958__bin.47.fa	https://s3-eu-west-1.amazonaws.com/sgb-genomes/data/eggnog/19850.tsv	https://s3-eu-west-1.amazonaws.com/sgb-genomes/data/uniref/90/19850/HMP_2012__SRS023958__bin.47.txt
HMP_2012__SRS064329__bin.17	19850	Yes	HMP_2012	SRS064329	659449	85745	24	65.36	0	N/A	N/A	Candidatus Saccharibacteria	Candidatus Saccharibacteria	Candidatus Saccharibacteria	Candidatus Saccharibacteria	Bacteria	Candidatus Saccharibacteria	Candidatus Saccharibacteria	Candidatus Saccharibacteria	Candidatus Saccharibacteria	Candidatus Saccharibacteria	Candidatus Saccharibacteria	Bacteria	0.15	https://s3-eu-west-1.amazonaws.com/sgb-genomes/data/genomes/19850/HMP_2012__SRS064329__bin.17.fa	https://s3-eu-west-1.amazonaws.com/sgb-genomes/data/eggnog/19850.tsv	https://s3-eu-west-1.amazonaws.com/sgb-genomes/data/uniref/90/19850/HMP_2012__SRS064329__bin.17.txt
CM_periimplantitis__SP_163SPI_T016__bin.9	19883	Yes	CM_periimplantitis	SP_163SPI_T016	659387	100349	10	58.62	0	N/A	N/A	Candidatus Saccharibacteria	Candidatus Saccharibacteria	Candidatus Saccharibacteria	Candidatus Saccharibacteria	Bacteria	Candidatus Saccharibacteria	Candidatus Saccharibacteria	Candidatus Saccharibacteria	Candidatus Saccharibacteria	Candidatus Saccharibacteria	Candidatus Saccharibacteria	Bacteria	0.21	https://s3-eu-west-1.amazonaws.com/sgb-genomes/data/genomes/19883/CM_periimplantitis__SP_163SPI_T016__bin.9.fa	https://s3-eu-west-1.amazonaws.com/sgb-genomes/data/eggnog/19883.tsv	https://s3-eu-west-1.amazonaws.com/sgb-genomes/data/uniref/90/19883/CM_periimplantitis__SP_163SPI_T016__bin.9.txt
HMP_2012__SRS017139__bin.1	19895	Yes	HMP_2012	SRS017139	658986	15029	60	55.84	0	N/A	N/A	Candidatus Saccharibacteria	Candidatus Saccharibacteria	Candidatus Saccharibacteria	Candidatus Saccharibacteria	Bacteria	Candidatus Saccharibacteria	Candidatus Saccharibacteria	Candidatus Saccharibacteria	Candidatus Saccharibacteria	Candidatus Saccharibacteria	Candidatus Saccharibacteria	Bacteria	0.15	https://s3-eu-west-1.amazonaws.com/sgb-genomes/data/genomes/19895/HMP_2012__SRS017139__bin.1.fa	https://s3-eu-west-1.amazonaws.com/sgb-genomes/data/eggnog/19895.tsv	https://s3-eu-west-1.amazonaws.com/sgb-genomes/data/uniref/90/19895/HMP_2012__SRS017139__bin.1.txt
HMP_2012__SRS018791__bin.10	19869	Yes	HMP_2012	SRS018791	658938	57922	19	64.67	0.85	N/A	N/A	Candidatus Saccharibacteria	Candidatus Saccharibacteria	Candidatus Saccharibacteria	Candidatus Saccharibacteria	Bacteria	Candidatus Saccharibacteria	Candidatus Saccharibacteria	Candidatus Saccharibacteria	Candidatus Saccharibacteria	Candidatus Saccharibacteria	Candidatus Saccharibacteria	Bacteria	0.16	https://s3-eu-west-1.amazonaws.com/sgb-genomes/data/genomes/19869/HMP_2012__SRS018791__bin.10.fa	https://s3-eu-west-1.amazonaws.com/sgb-genomes/data/eggnog/19869.tsv	https://s3-eu-west-1.amazonaws.com/sgb-genomes/data/uniref/90/19869/HMP_2012__SRS018791__bin.10.txt
HMP_2012__SRS019029__bin.42	19894	Yes	HMP_2012	SRS019029	657249	27467	44	57.26	0	N/A	N/A	Candidatus Saccharibacteria	Candidatus Saccharibacteria	Candidatus Saccharibacteria	Candidatus Saccharibacteria	Bacteria	Candidatus Saccharibacteria	Candidatus Saccharibacteria	Candidatus Saccharibacteria	Candidatus Saccharibacteria	Candidatus Saccharibacteria	Candidatus Saccharibacteria	Bacteria	0.16	https://s3-eu-west-1.amazonaws.com/sgb-genomes/data/genomes/19894/HMP_2012__SRS019029__bin.42.fa	https://s3-eu-west-1.amazonaws.com/sgb-genomes/data/eggnog/19894.tsv	https://s3-eu-west-1.amazonaws.com/sgb-genomes/data/uniref/90/19894/HMP_2012__SRS019029__bin.42.txt
HMP_2012__SRS019028__bin.14	19894	Yes	HMP_2012	SRS019028	656732	42075	26	62.87	0	N/A	N/A	Candidatus Saccharibacteria	Candidatus Saccharibacteria	Candidatus Saccharibacteria	Candidatus Saccharibacteria	Bacteria	Candidatus Saccharibacteria	Candidatus Saccharibacteria	Candidatus Saccharibacteria	Candidatus Saccharibacteria	Candidatus Saccharibacteria	Candidatus Saccharibacteria	Bacteria	0.16	https://s3-eu-west-1.amazonaws.com/sgb-genomes/data/genomes/19894/HMP_2012__SRS019028__bin.14.fa	https://s3-eu-west-1.amazonaws.com/sgb-genomes/data/eggnog/19894.tsv	https://s3-eu-west-1.amazonaws.com/sgb-genomes/data/uniref/90/19894/HMP_2012__SRS019028__bin.14.txt
HMP_2012__SRS014684__bin.36	19850	Yes	HMP_2012	SRS014684	656554	123819	15	61.5	0	N/A	N/A	Candidatus Saccharibacteria	Candidatus Saccharibacteria	Candidatus Saccharibacteria	Candidatus Saccharibacteria	Bacteria	Candidatus Saccharibacteria	Candidatus Saccharibacteria	Candidatus Saccharibacteria	Candidatus Saccharibacteria	Candidatus Saccharibacteria	Candidatus Saccharibacteria	Bacteria	0.15	https://s3-eu-west-1.amazonaws.com/sgb-genomes/data/genomes/19850/HMP_2012__SRS014684__bin.36.fa	https://s3-eu-west-1.amazonaws.com/sgb-genomes/data/eggnog/19850.tsv	https://s3-eu-west-1.amazonaws.com/sgb-genomes/data/uniref/90/19850/HMP_2012__SRS014684__bin.36.txt
HMP_2012__SRS051930__bin.35	19890	Yes	HMP_2012	SRS051930	655197	9802	92	58.23	1.71	N/A	N/A	Candidatus Saccharibacteria	Candidatus Saccharibacteria	Candidatus Saccharibacteria	Candidatus Saccharibacteria	Bacteria	Candidatus Saccharibacteria	Candidatus Saccharibacteria	Candidatus Saccharibacteria	Candidatus Saccharibacteria	Candidatus Saccharibacteria	Candidatus Saccharibacteria	Bacteria	0.16	https://s3-eu-west-1.amazonaws.com/sgb-genomes/data/genomes/19890/HMP_2012__SRS051930__bin.35.fa	https://s3-eu-west-1.amazonaws.com/sgb-genomes/data/eggnog/19890.tsv	https://s3-eu-west-1.amazonaws.com/sgb-genomes/data/uniref/90/19890/HMP_2012__SRS051930__bin.35.txt
HMP_2012__SRS013533__bin.31	19880	Yes	HMP_2012	SRS013533	653961	8593	101	59.23	0.85	N/A	N/A	Candidatus Saccharibacteria	Candidatus Saccharibacteria	Candidatus Saccharibacteria	Candidatus Saccharibacteria	Bacteria	Candidatus Saccharibacteria	Candidatus Saccharibacteria	Candidatus Saccharibacteria	Candidatus Saccharibacteria	Candidatus Saccharibacteria	Candidatus Saccharibacteria	Bacteria	0.23	https://s3-eu-west-1.amazonaws.com/sgb-genomes/data/genomes/19880/HMP_2012__SRS013533__bin.31.fa	https://s3-eu-west-1.amazonaws.com/sgb-genomes/data/eggnog/19880.tsv	https://s3-eu-west-1.amazonaws.com/sgb-genomes/data/uniref/90/19880/HMP_2012__SRS013533__bin.31.txt
CM_periimplantitis__SP_502SPT_T016__bin.4	19881	Yes	CM_periimplantitis	SP_502SPT_T016	652272	25414	38	69.09	3.37	N/A	N/A	Candidatus Saccharibacteria	Candidatus Saccharibacteria	Candidatus Saccharibacteria	Candidatus Saccharibacteria	Bacteria	Candidatus Saccharibacteria	Candidatus Saccharibacteria	Candidatus Saccharibacteria	Candidatus Saccharibacteria	Candidatus Saccharibacteria	Candidatus Saccharibacteria	Bacteria	0.24	https://s3-eu-west-1.amazonaws.com/sgb-genomes/data/genomes/19881/CM_periimplantitis__SP_502SPT_T016__bin.4.fa	https://s3-eu-west-1.amazonaws.com/sgb-genomes/data/eggnog/19881.tsv	https://s3-eu-west-1.amazonaws.com/sgb-genomes/data/uniref/90/19881/CM_periimplantitis__SP_502SPT_T016__bin.4.txt
FerrettiP_2018__CA_C10032MS2543SA_t0M15__bin.4	19860	Yes	FerrettiP_2018	CA_C10032MS2543SA_t0M15	649703	23804	54	61.11	3.56	N/A	N/A	Candidatus Saccharibacteria	Candidatus Saccharibacteria	Candidatus Saccharibacteria	Candidatus Saccharibacteria	Bacteria	Candidatus Saccharibacteria	Candidatus Saccharibacteria	Candidatus Saccharibacteria	Candidatus Saccharibacteria	Candidatus Saccharibacteria	Candidatus Saccharibacteria	Bacteria	0.15	https://s3-eu-west-1.amazonaws.com/sgb-genomes/data/genomes/19860/FerrettiP_2018__CA_C10032MS2543SA_t0M15__bin.4.fa	https://s3-eu-west-1.amazonaws.com/sgb-genomes/data/eggnog/19860.tsv	https://s3-eu-west-1.amazonaws.com/sgb-genomes/data/uniref/90/19860/FerrettiP_2018__CA_C10032MS2543SA_t0M15__bin.4.txt
HMP_2012__SRS063932__bin.95	19893	Yes	HMP_2012	SRS063932	649376	15013	62	59.41	0	N/A	N/A	Candidatus Saccharibacteria	Candidatus Saccharibacteria	Candidatus Saccharibacteria	Candidatus Saccharibacteria	Bacteria	Candidatus Saccharibacteria	Candidatus Saccharibacteria	Candidatus Saccharibacteria	Candidatus Saccharibacteria	Candidatus Saccharibacteria	Candidatus Saccharibacteria	Bacteria	0.16	https://s3-eu-west-1.amazonaws.com/sgb-genomes/data/genomes/19893/HMP_2012__SRS063932__bin.95.fa	https://s3-eu-west-1.amazonaws.com/sgb-genomes/data/eggnog/19893.tsv	https://s3-eu-west-1.amazonaws.com/sgb-genomes/data/uniref/90/19893/HMP_2012__SRS063932__bin.95.txt
HMP_2012__SRS053603__bin.73	19876	Yes	HMP_2012	SRS053603	649254	17186	60	53.21	3.61	N/A	N/A	Candidatus Saccharibacteria	Candidatus Saccharibacteria	Candidatus Saccharibacteria	Candidatus Saccharibacteria	Bacteria	Candidatus Saccharibacteria	Candidatus Saccharibacteria	Candidatus Saccharibacteria	Candidatus Saccharibacteria	Candidatus Saccharibacteria	Candidatus Saccharibacteria	Bacteria	0.17	https://s3-eu-west-1.amazonaws.com/sgb-genomes/data/genomes/19876/HMP_2012__SRS053603__bin.73.fa	https://s3-eu-west-1.amazonaws.com/sgb-genomes/data/eggnog/19876.tsv	https://s3-eu-west-1.amazonaws.com/sgb-genomes/data/uniref/90/19876/HMP_2012__SRS053603__bin.73.txt
HMP_2012__SRS016002__bin.69	19863	Yes	HMP_2012	SRS016002	647848	25009	38	67.74	0	N/A	N/A	Candidatus Saccharibacteria	Candidatus Saccharibacteria	Candidatus Saccharibacteria	Candidatus Saccharibacteria	Bacteria	Candidatus Saccharibacteria	Candidatus Saccharibacteria	Candidatus Saccharibacteria	Candidatus Saccharibacteria	Candidatus Saccharibacteria	Candidatus Saccharibacteria	Bacteria	0.16	https://s3-eu-west-1.amazonaws.com/sgb-genomes/data/genomes/19863/HMP_2012__SRS016002__bin.69.fa	https://s3-eu-west-1.amazonaws.com/sgb-genomes/data/eggnog/19863.tsv	https://s3-eu-west-1.amazonaws.com/sgb-genomes/data/uniref/90/19863/HMP_2012__SRS016002__bin.69.txt
HMP_2012__SRS018394__bin.25	19896	Yes	HMP_2012	SRS018394	647231	10057	79	55.01	3.29	N/A	N/A	Candidatus Saccharibacteria	Candidatus Saccharibacteria	Candidatus Saccharibacteria	Candidatus Saccharibacteria	Bacteria	Candidatus Saccharibacteria	Candidatus Saccharibacteria	Candidatus Saccharibacteria	Candidatus Saccharibacteria	Candidatus Saccharibacteria	Candidatus Saccharibacteria	Bacteria	0.17	https://s3-eu-west-1.amazonaws.com/sgb-genomes/data/genomes/19896/HMP_2012__SRS018394__bin.25.fa	https://s3-eu-west-1.amazonaws.com/sgb-genomes/data/eggnog/19896.tsv	https://s3-eu-west-1.amazonaws.com/sgb-genomes/data/uniref/90/19896/HMP_2012__SRS018394__bin.25.txt
HMP_2012__SRS017691__bin.12	19891	Yes	HMP_2012	SRS017691	646483	11196	71	53.56	2.78	N/A	N/A	Candidatus Saccharibacteria	Candidatus Saccharibacteria	Candidatus Saccharibacteria	Candidatus Saccharibacteria	Bacteria	Candidatus Saccharibacteria	Candidatus Saccharibacteria	Candidatus Saccharibacteria	Candidatus Saccharibacteria	Candidatus Saccharibacteria	Candidatus Saccharibacteria	Bacteria	0.16	https://s3-eu-west-1.amazonaws.com/sgb-genomes/data/genomes/19891/HMP_2012__SRS017691__bin.12.fa	https://s3-eu-west-1.amazonaws.com/sgb-genomes/data/eggnog/19891.tsv	https://s3-eu-west-1.amazonaws.com/sgb-genomes/data/uniref/90/19891/HMP_2012__SRS017691__bin.12.txt
HMP_2012__SRS019022__bin.43	19850	Yes	HMP_2012	SRS019022	644300	87627	19	57.83	0.85	N/A	N/A	Candidatus Saccharibacteria	Candidatus Saccharibacteria	Candidatus Saccharibacteria	Candidatus Saccharibacteria	Bacteria	Candidatus Saccharibacteria	Candidatus Saccharibacteria	Candidatus Saccharibacteria	Candidatus Saccharibacteria	Candidatus Saccharibacteria	Candidatus Saccharibacteria	Bacteria	0.15	https://s3-eu-west-1.amazonaws.com/sgb-genomes/data/genomes/19850/HMP_2012__SRS019022__bin.43.fa	https://s3-eu-west-1.amazonaws.com/sgb-genomes/data/eggnog/19850.tsv	https://s3-eu-west-1.amazonaws.com/sgb-genomes/data/uniref/90/19850/HMP_2012__SRS019022__bin.43.txt
HMP_2012__SRS019127__bin.5	19869	Yes	HMP_2012	SRS019127	643638	97234	11	61.35	0	N/A	N/A	Candidatus Saccharibacteria	Candidatus Saccharibacteria	Candidatus Saccharibacteria	Candidatus Saccharibacteria	Bacteria	Candidatus Saccharibacteria	Candidatus Saccharibacteria	Candidatus Saccharibacteria	Candidatus Saccharibacteria	Candidatus Saccharibacteria	Candidatus Saccharibacteria	Bacteria	0.16	https://s3-eu-west-1.amazonaws.com/sgb-genomes/data/genomes/19869/HMP_2012__SRS019127__bin.5.fa	https://s3-eu-west-1.amazonaws.com/sgb-genomes/data/eggnog/19869.tsv	https://s3-eu-west-1.amazonaws.com/sgb-genomes/data/uniref/90/19869/HMP_2012__SRS019127__bin.5.txt
HMP_2012__SRS016331__bin.44	19880	Yes	HMP_2012	SRS016331	642135	6016	124	52.19	0.85	N/A	N/A	Candidatus Saccharibacteria	Candidatus Saccharibacteria	Candidatus Saccharibacteria	Candidatus Saccharibacteria	Bacteria	Candidatus Saccharibacteria	Candidatus Saccharibacteria	Candidatus Saccharibacteria	Candidatus Saccharibacteria	Candidatus Saccharibacteria	Candidatus Saccharibacteria	Bacteria	0.23	https://s3-eu-west-1.amazonaws.com/sgb-genomes/data/genomes/19880/HMP_2012__SRS016331__bin.44.fa	https://s3-eu-west-1.amazonaws.com/sgb-genomes/data/eggnog/19880.tsv	https://s3-eu-west-1.amazonaws.com/sgb-genomes/data/uniref/90/19880/HMP_2012__SRS016331__bin.44.txt
HMP_2012__SRS048411__bin.8	19851	Yes	HMP_2012	SRS048411	640203	58808	27	60.68	0	N/A	N/A	Candidatus Saccharibacteria	Candidatus Saccharibacteria	Candidatus Saccharibacteria	Candidatus Saccharibacteria	Bacteria	Candidatus Saccharibacteria	Candidatus Saccharibacteria	Candidatus Saccharibacteria	Candidatus Saccharibacteria	Candidatus Saccharibacteria	Candidatus Saccharibacteria	Bacteria	0.16	https://s3-eu-west-1.amazonaws.com/sgb-genomes/data/genomes/19851/HMP_2012__SRS048411__bin.8.fa	https://s3-eu-west-1.amazonaws.com/sgb-genomes/data/eggnog/19851.tsv	https://s3-eu-west-1.amazonaws.com/sgb-genomes/data/uniref/90/19851/HMP_2012__SRS048411__bin.8.txt
HMP_2012__SRS017227__bin.78	19849	No	HMP_2012	SRS017227	639166	13726	60	66.38	2.59	Candidatus Saccharibacteria	Candidatus Saccharibacteria	Candidatus Saccharibacteria	Candidatus Saccharibacteria	Candidatus Saccharibacteria	Candidatus Saccharibacteria	Bacteria	Candidatus Saccharibacteria	Candidatus Saccharibacteria	Candidatus Saccharibacteria	Candidatus Saccharibacteria	Candidatus Saccharibacteria	Candidatus Saccharibacteria	Bacteria	0.05	https://s3-eu-west-1.amazonaws.com/sgb-genomes/data/genomes/19849/HMP_2012__SRS017227__bin.78.fa	https://s3-eu-west-1.amazonaws.com/sgb-genomes/data/eggnog/19849.tsv	https://s3-eu-west-1.amazonaws.com/sgb-genomes/data/uniref/90/19849/HMP_2012__SRS017227__bin.78.txt
HMP_2012__SRS019122__bin.34	19869	Yes	HMP_2012	SRS019122	638213	37792	30	58.12	0.85	N/A	N/A	Candidatus Saccharibacteria	Candidatus Saccharibacteria	Candidatus Saccharibacteria	Candidatus Saccharibacteria	Bacteria	Candidatus Saccharibacteria	Candidatus Saccharibacteria	Candidatus Saccharibacteria	Candidatus Saccharibacteria	Candidatus Saccharibacteria	Candidatus Saccharibacteria	Bacteria	0.16	https://s3-eu-west-1.amazonaws.com/sgb-genomes/data/genomes/19869/HMP_2012__SRS019122__bin.34.fa	https://s3-eu-west-1.amazonaws.com/sgb-genomes/data/eggnog/19869.tsv	https://s3-eu-west-1.amazonaws.com/sgb-genomes/data/uniref/90/19869/HMP_2012__SRS019122__bin.34.txt
HMP_2012__SRS049268__bin.27	19911	Yes	HMP_2012	SRS049268	638021	13769	62	53.86	0.93	N/A	N/A	Candidatus Saccharibacteria	Candidatus Saccharibacteria	Candidatus Saccharibacteria	Candidatus Saccharibacteria	Bacteria	Candidatus Saccharibacteria	Candidatus Saccharibacteria	Candidatus Saccharibacteria	Candidatus Saccharibacteria	Candidatus Saccharibacteria	Candidatus Saccharibacteria	Bacteria	0.14	https://s3-eu-west-1.amazonaws.com/sgb-genomes/data/genomes/19911/HMP_2012__SRS049268__bin.27.fa	https://s3-eu-west-1.amazonaws.com/sgb-genomes/data/eggnog/19911.tsv	https://s3-eu-west-1.amazonaws.com/sgb-genomes/data/uniref/90/19911/HMP_2012__SRS049268__bin.27.txt
HMP_2012__SRS015272__bin.48	19862	Yes	HMP_2012	SRS015272	634542	42241	24	62.82	0.85	N/A	N/A	Candidatus Saccharibacteria	Candidatus Saccharibacteria	Candidatus Saccharibacteria	Candidatus Saccharibacteria	Bacteria	Candidatus Saccharibacteria	Candidatus Saccharibacteria	Candidatus Saccharibacteria	Candidatus Saccharibacteria	Candidatus Saccharibacteria	Candidatus Saccharibacteria	Bacteria	0.15	https://s3-eu-west-1.amazonaws.com/sgb-genomes/data/genomes/19862/HMP_2012__SRS015272__bin.48.fa	https://s3-eu-west-1.amazonaws.com/sgb-genomes/data/eggnog/19862.tsv	https://s3-eu-west-1.amazonaws.com/sgb-genomes/data/uniref/90/19862/HMP_2012__SRS015272__bin.48.txt
HMP_2012__SRS017533__bin.12	19862	Yes	HMP_2012	SRS017533	634413	71838	23	61.54	0	N/A	N/A	Candidatus Saccharibacteria	Candidatus Saccharibacteria	Candidatus Saccharibacteria	Candidatus Saccharibacteria	Bacteria	Candidatus Saccharibacteria	Candidatus Saccharibacteria	Candidatus Saccharibacteria	Candidatus Saccharibacteria	Candidatus Saccharibacteria	Candidatus Saccharibacteria	Bacteria	0.15	https://s3-eu-west-1.amazonaws.com/sgb-genomes/data/genomes/19862/HMP_2012__SRS017533__bin.12.fa	https://s3-eu-west-1.amazonaws.com/sgb-genomes/data/eggnog/19862.tsv	https://s3-eu-west-1.amazonaws.com/sgb-genomes/data/uniref/90/19862/HMP_2012__SRS017533__bin.12.txt
HMP_2012__SRS049318__bin.39	19880	Yes	HMP_2012	SRS049318	631982	14211	64	71.38	0	N/A	N/A	Candidatus Saccharibacteria	Candidatus Saccharibacteria	Candidatus Saccharibacteria	Candidatus Saccharibacteria	Bacteria	Candidatus Saccharibacteria	Candidatus Saccharibacteria	Candidatus Saccharibacteria	Candidatus Saccharibacteria	Candidatus Saccharibacteria	Candidatus Saccharibacteria	Bacteria	0.23	https://s3-eu-west-1.amazonaws.com/sgb-genomes/data/genomes/19880/HMP_2012__SRS049318__bin.39.fa	https://s3-eu-west-1.amazonaws.com/sgb-genomes/data/eggnog/19880.tsv	https://s3-eu-west-1.amazonaws.com/sgb-genomes/data/uniref/90/19880/HMP_2012__SRS049318__bin.39.txt
HMP_2012__SRS024081__bin.40	19850	Yes	HMP_2012	SRS024081	631974	46307	34	59.23	0	N/A	N/A	Candidatus Saccharibacteria	Candidatus Saccharibacteria	Candidatus Saccharibacteria	Candidatus Saccharibacteria	Bacteria	Candidatus Saccharibacteria	Candidatus Saccharibacteria	Candidatus Saccharibacteria	Candidatus Saccharibacteria	Candidatus Saccharibacteria	Candidatus Saccharibacteria	Bacteria	0.15	https://s3-eu-west-1.amazonaws.com/sgb-genomes/data/genomes/19850/HMP_2012__SRS024081__bin.40.fa	https://s3-eu-west-1.amazonaws.com/sgb-genomes/data/eggnog/19850.tsv	https://s3-eu-west-1.amazonaws.com/sgb-genomes/data/uniref/90/19850/HMP_2012__SRS024081__bin.40.txt
HMP_2012__SRS063999__bin.54	19885	Yes	HMP_2012	SRS063999	629815	66950	15	51.08	0.93	N/A	N/A	Candidatus Saccharibacteria	Candidatus Saccharibacteria	Candidatus Saccharibacteria	Candidatus Saccharibacteria	Bacteria	Candidatus Saccharibacteria	Candidatus Saccharibacteria	Candidatus Saccharibacteria	Candidatus Saccharibacteria	Candidatus Saccharibacteria	Candidatus Saccharibacteria	Bacteria	0.21	https://s3-eu-west-1.amazonaws.com/sgb-genomes/data/genomes/19885/HMP_2012__SRS063999__bin.54.fa	https://s3-eu-west-1.amazonaws.com/sgb-genomes/data/eggnog/19885.tsv	https://s3-eu-west-1.amazonaws.com/sgb-genomes/data/uniref/90/19885/HMP_2012__SRS063999__bin.54.txt
HMP_2012__SRS047634__bin.85	19892	Yes	HMP_2012	SRS047634	626298	11227	66	68.77	2.81	N/A	N/A	Candidatus Saccharibacteria	Candidatus Saccharibacteria	Candidatus Saccharibacteria	Candidatus Saccharibacteria	Bacteria	Candidatus Saccharibacteria	Candidatus Saccharibacteria	Candidatus Saccharibacteria	Candidatus Saccharibacteria	Candidatus Saccharibacteria	Candidatus Saccharibacteria	Bacteria	0.15	https://s3-eu-west-1.amazonaws.com/sgb-genomes/data/genomes/19892/HMP_2012__SRS047634__bin.85.fa	https://s3-eu-west-1.amazonaws.com/sgb-genomes/data/eggnog/19892.tsv	https://s3-eu-west-1.amazonaws.com/sgb-genomes/data/uniref/90/19892/HMP_2012__SRS047634__bin.85.txt
HMP_2012__SRS013170__bin.64	19880	Yes	HMP_2012	SRS013170	621650	26229	40	61.68	0.85	N/A	N/A	Candidatus Saccharibacteria	Candidatus Saccharibacteria	Candidatus Saccharibacteria	Candidatus Saccharibacteria	Bacteria	Candidatus Saccharibacteria	Candidatus Saccharibacteria	Candidatus Saccharibacteria	Candidatus Saccharibacteria	Candidatus Saccharibacteria	Candidatus Saccharibacteria	Bacteria	0.23	https://s3-eu-west-1.amazonaws.com/sgb-genomes/data/genomes/19880/HMP_2012__SRS013170__bin.64.fa	https://s3-eu-west-1.amazonaws.com/sgb-genomes/data/eggnog/19880.tsv	https://s3-eu-west-1.amazonaws.com/sgb-genomes/data/uniref/90/19880/HMP_2012__SRS013170__bin.64.txt
HMP_2012__SRS022149__bin.6	19883	Yes	HMP_2012	SRS022149	621630	7485	107	68.94	1.12	N/A	N/A	Candidatus Saccharibacteria	Candidatus Saccharibacteria	Candidatus Saccharibacteria	Candidatus Saccharibacteria	Bacteria	Candidatus Saccharibacteria	Candidatus Saccharibacteria	Candidatus Saccharibacteria	Candidatus Saccharibacteria	Candidatus Saccharibacteria	Candidatus Saccharibacteria	Bacteria	0.21	https://s3-eu-west-1.amazonaws.com/sgb-genomes/data/genomes/19883/HMP_2012__SRS022149__bin.6.fa	https://s3-eu-west-1.amazonaws.com/sgb-genomes/data/eggnog/19883.tsv	https://s3-eu-west-1.amazonaws.com/sgb-genomes/data/uniref/90/19883/HMP_2012__SRS022149__bin.6.txt
HMP_2012__SRS019028__bin.29	19850	Yes	HMP_2012	SRS019028	618526	35778	26	60.1	0	N/A	N/A	Candidatus Saccharibacteria	Candidatus Saccharibacteria	Candidatus Saccharibacteria	Candidatus Saccharibacteria	Bacteria	Candidatus Saccharibacteria	Candidatus Saccharibacteria	Candidatus Saccharibacteria	Candidatus Saccharibacteria	Candidatus Saccharibacteria	Candidatus Saccharibacteria	Bacteria	0.15	https://s3-eu-west-1.amazonaws.com/sgb-genomes/data/genomes/19850/HMP_2012__SRS019028__bin.29.fa	https://s3-eu-west-1.amazonaws.com/sgb-genomes/data/eggnog/19850.tsv	https://s3-eu-west-1.amazonaws.com/sgb-genomes/data/uniref/90/19850/HMP_2012__SRS019028__bin.29.txt
HMP_2012__SRS013170__bin.63	19882	Yes	HMP_2012	SRS013170	612724	13642	64	54.42	1.85	N/A	N/A	Candidatus Saccharibacteria	Candidatus Saccharibacteria	Candidatus Saccharibacteria	Candidatus Saccharibacteria	Bacteria	Candidatus Saccharibacteria	Candidatus Saccharibacteria	Candidatus Saccharibacteria	Candidatus Saccharibacteria	Candidatus Saccharibacteria	Candidatus Saccharibacteria	Bacteria	0.23	https://s3-eu-west-1.amazonaws.com/sgb-genomes/data/genomes/19882/HMP_2012__SRS013170__bin.63.fa	https://s3-eu-west-1.amazonaws.com/sgb-genomes/data/eggnog/19882.tsv	https://s3-eu-west-1.amazonaws.com/sgb-genomes/data/uniref/90/19882/HMP_2012__SRS013170__bin.63.txt
HMP_2012__SRS016086__bin.14	19863	Yes	HMP_2012	SRS016086	611593	9904	81	61.37	1.71	N/A	N/A	Candidatus Saccharibacteria	Candidatus Saccharibacteria	Candidatus Saccharibacteria	Candidatus Saccharibacteria	Bacteria	Candidatus Saccharibacteria	Candidatus Saccharibacteria	Candidatus Saccharibacteria	Candidatus Saccharibacteria	Candidatus Saccharibacteria	Candidatus Saccharibacteria	Bacteria	0.16	https://s3-eu-west-1.amazonaws.com/sgb-genomes/data/genomes/19863/HMP_2012__SRS016086__bin.14.fa	https://s3-eu-west-1.amazonaws.com/sgb-genomes/data/eggnog/19863.tsv	https://s3-eu-west-1.amazonaws.com/sgb-genomes/data/uniref/90/19863/HMP_2012__SRS016086__bin.14.txt
HMP_2012__SRS019045__bin.24	19850	Yes	HMP_2012	SRS019045	611296	33458	35	61.25	0	N/A	N/A	Candidatus Saccharibacteria	Candidatus Saccharibacteria	Candidatus Saccharibacteria	Candidatus Saccharibacteria	Bacteria	Candidatus Saccharibacteria	Candidatus Saccharibacteria	Candidatus Saccharibacteria	Candidatus Saccharibacteria	Candidatus Saccharibacteria	Candidatus Saccharibacteria	Bacteria	0.15	https://s3-eu-west-1.amazonaws.com/sgb-genomes/data/genomes/19850/HMP_2012__SRS019045__bin.24.fa	https://s3-eu-west-1.amazonaws.com/sgb-genomes/data/eggnog/19850.tsv	https://s3-eu-west-1.amazonaws.com/sgb-genomes/data/uniref/90/19850/HMP_2012__SRS019045__bin.24.txt
HMP_2012__SRS018337__bin.21	19880	Yes	HMP_2012	SRS018337	611032	4774	153	58.91	2.22	N/A	N/A	Candidatus Saccharibacteria	Candidatus Saccharibacteria	Candidatus Saccharibacteria	Candidatus Saccharibacteria	Bacteria	Candidatus Saccharibacteria	Candidatus Saccharibacteria	Candidatus Saccharibacteria	Candidatus Saccharibacteria	Candidatus Saccharibacteria	Candidatus Saccharibacteria	Bacteria	0.23	https://s3-eu-west-1.amazonaws.com/sgb-genomes/data/genomes/19880/HMP_2012__SRS018337__bin.21.fa	https://s3-eu-west-1.amazonaws.com/sgb-genomes/data/eggnog/19880.tsv	https://s3-eu-west-1.amazonaws.com/sgb-genomes/data/uniref/90/19880/HMP_2012__SRS018337__bin.21.txt
HMP_2012__SRS058336__bin.8	19865	Yes	HMP_2012	SRS058336	610497	16609	54	57.41	0.85	N/A	N/A	Candidatus Saccharibacteria	Candidatus Saccharibacteria	Candidatus Saccharibacteria	Candidatus Saccharibacteria	Bacteria	Candidatus Saccharibacteria	Candidatus Saccharibacteria	Candidatus Saccharibacteria	Candidatus Saccharibacteria	Candidatus Saccharibacteria	Candidatus Saccharibacteria	Bacteria	0.17	https://s3-eu-west-1.amazonaws.com/sgb-genomes/data/genomes/19865/HMP_2012__SRS058336__bin.8.fa	https://s3-eu-west-1.amazonaws.com/sgb-genomes/data/eggnog/19865.tsv	https://s3-eu-west-1.amazonaws.com/sgb-genomes/data/uniref/90/19865/HMP_2012__SRS058336__bin.8.txt
HMP_2012__SRS015893__bin.22	19852	Yes	HMP_2012	SRS015893	609300	19152	50	52.56	0	N/A	N/A	Candidatus Saccharibacteria	Candidatus Saccharibacteria	Candidatus Saccharibacteria	Candidatus Saccharibacteria	Bacteria	Candidatus Saccharibacteria	Candidatus Saccharibacteria	Candidatus Saccharibacteria	Candidatus Saccharibacteria	Candidatus Saccharibacteria	Candidatus Saccharibacteria	Bacteria	0.16	https://s3-eu-west-1.amazonaws.com/sgb-genomes/data/genomes/19852/HMP_2012__SRS015893__bin.22.fa	https://s3-eu-west-1.amazonaws.com/sgb-genomes/data/eggnog/19852.tsv	https://s3-eu-west-1.amazonaws.com/sgb-genomes/data/uniref/90/19852/HMP_2012__SRS015893__bin.22.txt
HMP_2012__SRS015215__bin.49	19890	Yes	HMP_2012	SRS015215	606308	9598	85	64.11	1.72	N/A	N/A	Candidatus Saccharibacteria	Candidatus Saccharibacteria	Candidatus Saccharibacteria	Candidatus Saccharibacteria	Bacteria	Candidatus Saccharibacteria	Candidatus Saccharibacteria	Candidatus Saccharibacteria	Candidatus Saccharibacteria	Candidatus Saccharibacteria	Candidatus Saccharibacteria	Bacteria	0.16	https://s3-eu-west-1.amazonaws.com/sgb-genomes/data/genomes/19890/HMP_2012__SRS015215__bin.49.fa	https://s3-eu-west-1.amazonaws.com/sgb-genomes/data/eggnog/19890.tsv	https://s3-eu-west-1.amazonaws.com/sgb-genomes/data/uniref/90/19890/HMP_2012__SRS015215__bin.49.txt
YuJ_2015__SZAXPI017595-169__bin.12	19863	Yes	YuJ_2015	SZAXPI017595-169	605606	6629	109	57.64	0	N/A	N/A	Candidatus Saccharibacteria	Candidatus Saccharibacteria	Candidatus Saccharibacteria	Candidatus Saccharibacteria	Bacteria	Candidatus Saccharibacteria	Candidatus Saccharibacteria	Candidatus Saccharibacteria	Candidatus Saccharibacteria	Candidatus Saccharibacteria	Candidatus Saccharibacteria	Bacteria	0.16	https://s3-eu-west-1.amazonaws.com/sgb-genomes/data/genomes/19863/YuJ_2015__SZAXPI017595-169__bin.12.fa	https://s3-eu-west-1.amazonaws.com/sgb-genomes/data/eggnog/19863.tsv	https://s3-eu-west-1.amazonaws.com/sgb-genomes/data/uniref/90/19863/YuJ_2015__SZAXPI017595-169__bin.12.txt
HMP_2012__SRS047634__bin.40	19880	Yes	HMP_2012	SRS047634	604543	106437	9	59.97	0.85	N/A	N/A	Candidatus Saccharibacteria	Candidatus Saccharibacteria	Candidatus Saccharibacteria	Candidatus Saccharibacteria	Bacteria	Candidatus Saccharibacteria	Candidatus Saccharibacteria	Candidatus Saccharibacteria	Candidatus Saccharibacteria	Candidatus Saccharibacteria	Candidatus Saccharibacteria	Bacteria	0.23	https://s3-eu-west-1.amazonaws.com/sgb-genomes/data/genomes/19880/HMP_2012__SRS047634__bin.40.fa	https://s3-eu-west-1.amazonaws.com/sgb-genomes/data/eggnog/19880.tsv	https://s3-eu-west-1.amazonaws.com/sgb-genomes/data/uniref/90/19880/HMP_2012__SRS047634__bin.40.txt
HMP_2012__SRS019126__bin.23	19869	Yes	HMP_2012	SRS019126	603790	32404	38	55.56	0.85	N/A	N/A	Candidatus Saccharibacteria	Candidatus Saccharibacteria	Candidatus Saccharibacteria	Candidatus Saccharibacteria	Bacteria	Candidatus Saccharibacteria	Candidatus Saccharibacteria	Candidatus Saccharibacteria	Candidatus Saccharibacteria	Candidatus Saccharibacteria	Candidatus Saccharibacteria	Bacteria	0.16	https://s3-eu-west-1.amazonaws.com/sgb-genomes/data/genomes/19869/HMP_2012__SRS019126__bin.23.fa	https://s3-eu-west-1.amazonaws.com/sgb-genomes/data/eggnog/19869.tsv	https://s3-eu-west-1.amazonaws.com/sgb-genomes/data/uniref/90/19869/HMP_2012__SRS019126__bin.23.txt
HMP_2012__SRS021477__bin.34	19893	Yes	HMP_2012	SRS021477	603423	22962	37	54.63	0.93	N/A	N/A	Candidatus Saccharibacteria	Candidatus Saccharibacteria	Candidatus Saccharibacteria	Candidatus Saccharibacteria	Bacteria	Candidatus Saccharibacteria	Candidatus Saccharibacteria	Candidatus Saccharibacteria	Candidatus Saccharibacteria	Candidatus Saccharibacteria	Candidatus Saccharibacteria	Bacteria	0.16	https://s3-eu-west-1.amazonaws.com/sgb-genomes/data/genomes/19893/HMP_2012__SRS021477__bin.34.fa	https://s3-eu-west-1.amazonaws.com/sgb-genomes/data/eggnog/19893.tsv	https://s3-eu-west-1.amazonaws.com/sgb-genomes/data/uniref/90/19893/HMP_2012__SRS021477__bin.34.txt
HMP_2012__SRS024015__bin.47	19863	Yes	HMP_2012	SRS024015	601196	65192	23	53.68	0	N/A	N/A	Candidatus Saccharibacteria	Candidatus Saccharibacteria	Candidatus Saccharibacteria	Candidatus Saccharibacteria	Bacteria	Candidatus Saccharibacteria	Candidatus Saccharibacteria	Candidatus Saccharibacteria	Candidatus Saccharibacteria	Candidatus Saccharibacteria	Candidatus Saccharibacteria	Bacteria	0.16	https://s3-eu-west-1.amazonaws.com/sgb-genomes/data/genomes/19863/HMP_2012__SRS024015__bin.47.fa	https://s3-eu-west-1.amazonaws.com/sgb-genomes/data/eggnog/19863.tsv	https://s3-eu-west-1.amazonaws.com/sgb-genomes/data/uniref/90/19863/HMP_2012__SRS024015__bin.47.txt
CM_cf__CF_TNFC005SA_t1M15__bin.18	19866	Yes	CM_cf	CF_TNFC005SA_t1M15	600740	38051	31	52.82	1.71	N/A	N/A	Candidatus Saccharibacteria	Candidatus Saccharibacteria	Candidatus Saccharibacteria	Candidatus Saccharibacteria	Bacteria	Candidatus Saccharibacteria	Candidatus Saccharibacteria	Candidatus Saccharibacteria	Candidatus Saccharibacteria	Candidatus Saccharibacteria	Candidatus Saccharibacteria	Bacteria	0.15	https://s3-eu-west-1.amazonaws.com/sgb-genomes/data/genomes/19866/CM_cf__CF_TNFC005SA_t1M15__bin.18.fa	https://s3-eu-west-1.amazonaws.com/sgb-genomes/data/eggnog/19866.tsv	https://s3-eu-west-1.amazonaws.com/sgb-genomes/data/uniref/90/19866/CM_cf__CF_TNFC005SA_t1M15__bin.18.txt
HMP_2012__SRS049318__bin.16	19848	Yes	HMP_2012	SRS049318	600113	18985	43	51.54	0	N/A	Candidatus Saccharibacteria	Candidatus Saccharibacteria	Candidatus Saccharibacteria	Candidatus Saccharibacteria	Candidatus Saccharibacteria	Bacteria	Candidatus Saccharibacteria	Candidatus Saccharibacteria	Candidatus Saccharibacteria	Candidatus Saccharibacteria	Candidatus Saccharibacteria	Candidatus Saccharibacteria	Bacteria	0.06	https://s3-eu-west-1.amazonaws.com/sgb-genomes/data/genomes/19848/HMP_2012__SRS049318__bin.16.fa	https://s3-eu-west-1.amazonaws.com/sgb-genomes/data/eggnog/19848.tsv	https://s3-eu-west-1.amazonaws.com/sgb-genomes/data/uniref/90/19848/HMP_2012__SRS049318__bin.16.txt
FerrettiP_2018__CA_C10002MS2015SA_t0M15__bin.14	19875	Yes	FerrettiP_2018	CA_C10002MS2015SA_t0M15	600102	6426	108	66.82	0.86	N/A	N/A	Candidatus Saccharibacteria	Candidatus Saccharibacteria	Candidatus Saccharibacteria	Candidatus Saccharibacteria	Bacteria	Candidatus Saccharibacteria	Candidatus Saccharibacteria	Candidatus Saccharibacteria	Candidatus Saccharibacteria	Candidatus Saccharibacteria	Candidatus Saccharibacteria	Bacteria	0.16	https://s3-eu-west-1.amazonaws.com/sgb-genomes/data/genomes/19875/FerrettiP_2018__CA_C10002MS2015SA_t0M15__bin.14.fa	https://s3-eu-west-1.amazonaws.com/sgb-genomes/data/eggnog/19875.tsv	https://s3-eu-west-1.amazonaws.com/sgb-genomes/data/uniref/90/19875/FerrettiP_2018__CA_C10002MS2015SA_t0M15__bin.14.txt
HMP_2012__SRS052876__bin.36	19881	Yes	HMP_2012	SRS052876	598684	12089	67	52.93	0.93	N/A	N/A	Candidatus Saccharibacteria	Candidatus Saccharibacteria	Candidatus Saccharibacteria	Candidatus Saccharibacteria	Bacteria	Candidatus Saccharibacteria	Candidatus Saccharibacteria	Candidatus Saccharibacteria	Candidatus Saccharibacteria	Candidatus Saccharibacteria	Candidatus Saccharibacteria	Bacteria	0.24	https://s3-eu-west-1.amazonaws.com/sgb-genomes/data/genomes/19881/HMP_2012__SRS052876__bin.36.fa	https://s3-eu-west-1.amazonaws.com/sgb-genomes/data/eggnog/19881.tsv	https://s3-eu-west-1.amazonaws.com/sgb-genomes/data/uniref/90/19881/HMP_2012__SRS052876__bin.36.txt
HMP_2012__SRS022536__bin.17	19883	Yes	HMP_2012	SRS022536	593516	8510	89	63.65	3.37	N/A	N/A	Candidatus Saccharibacteria	Candidatus Saccharibacteria	Candidatus Saccharibacteria	Candidatus Saccharibacteria	Bacteria	Candidatus Saccharibacteria	Candidatus Saccharibacteria	Candidatus Saccharibacteria	Candidatus Saccharibacteria	Candidatus Saccharibacteria	Candidatus Saccharibacteria	Bacteria	0.21	https://s3-eu-west-1.amazonaws.com/sgb-genomes/data/genomes/19883/HMP_2012__SRS022536__bin.17.fa	https://s3-eu-west-1.amazonaws.com/sgb-genomes/data/eggnog/19883.tsv	https://s3-eu-west-1.amazonaws.com/sgb-genomes/data/uniref/90/19883/HMP_2012__SRS022536__bin.17.txt
HMP_2012__SRS013705__bin.17	19857	Yes	HMP_2012	SRS013705	591188	14609	62	53.2	0	N/A	N/A	Candidatus Saccharibacteria	Candidatus Saccharibacteria	Candidatus Saccharibacteria	Candidatus Saccharibacteria	Bacteria	Candidatus Saccharibacteria	Candidatus Saccharibacteria	Candidatus Saccharibacteria	Candidatus Saccharibacteria	Candidatus Saccharibacteria	Candidatus Saccharibacteria	Bacteria	0.16	https://s3-eu-west-1.amazonaws.com/sgb-genomes/data/genomes/19857/HMP_2012__SRS013705__bin.17.fa	https://s3-eu-west-1.amazonaws.com/sgb-genomes/data/eggnog/19857.tsv	https://s3-eu-west-1.amazonaws.com/sgb-genomes/data/uniref/90/19857/HMP_2012__SRS013705__bin.17.txt
HMP_2012__SRS014692__bin.7	19850	Yes	HMP_2012	SRS014692	589353	9611	90	55.81	0.85	N/A	N/A	Candidatus Saccharibacteria	Candidatus Saccharibacteria	Candidatus Saccharibacteria	Candidatus Saccharibacteria	Bacteria	Candidatus Saccharibacteria	Candidatus Saccharibacteria	Candidatus Saccharibacteria	Candidatus Saccharibacteria	Candidatus Saccharibacteria	Candidatus Saccharibacteria	Bacteria	0.15	https://s3-eu-west-1.amazonaws.com/sgb-genomes/data/genomes/19850/HMP_2012__SRS014692__bin.7.fa	https://s3-eu-west-1.amazonaws.com/sgb-genomes/data/eggnog/19850.tsv	https://s3-eu-west-1.amazonaws.com/sgb-genomes/data/uniref/90/19850/HMP_2012__SRS014692__bin.7.txt
HMP_2012__SRS016740__bin.41	19871	Yes	HMP_2012	SRS016740	584960	7928	102	56.33	4.17	N/A	N/A	Candidatus Saccharibacteria	Candidatus Saccharibacteria	Candidatus Saccharibacteria	Candidatus Saccharibacteria	Bacteria	Candidatus Saccharibacteria	Candidatus Saccharibacteria	Candidatus Saccharibacteria	Candidatus Saccharibacteria	Candidatus Saccharibacteria	Candidatus Saccharibacteria	Bacteria	0.16	https://s3-eu-west-1.amazonaws.com/sgb-genomes/data/genomes/19871/HMP_2012__SRS016740__bin.41.fa	https://s3-eu-west-1.amazonaws.com/sgb-genomes/data/eggnog/19871.tsv	https://s3-eu-west-1.amazonaws.com/sgb-genomes/data/uniref/90/19871/HMP_2012__SRS016740__bin.41.txt
HMP_2012__SRS077736__bin.6	19850	Yes	HMP_2012	SRS077736	583866	174155	5	60.83	0	N/A	N/A	Candidatus Saccharibacteria	Candidatus Saccharibacteria	Candidatus Saccharibacteria	Candidatus Saccharibacteria	Bacteria	Candidatus Saccharibacteria	Candidatus Saccharibacteria	Candidatus Saccharibacteria	Candidatus Saccharibacteria	Candidatus Saccharibacteria	Candidatus Saccharibacteria	Bacteria	0.15	https://s3-eu-west-1.amazonaws.com/sgb-genomes/data/genomes/19850/HMP_2012__SRS077736__bin.6.fa	https://s3-eu-west-1.amazonaws.com/sgb-genomes/data/eggnog/19850.tsv	https://s3-eu-west-1.amazonaws.com/sgb-genomes/data/uniref/90/19850/HMP_2012__SRS077736__bin.6.txt
HMP_2012__SRS024021__bin.21	19889	Yes	HMP_2012	SRS024021	579590	39856	24	56.51	0	N/A	N/A	Candidatus Saccharibacteria	Candidatus Saccharibacteria	Candidatus Saccharibacteria	Candidatus Saccharibacteria	Bacteria	Candidatus Saccharibacteria	Candidatus Saccharibacteria	Candidatus Saccharibacteria	Candidatus Saccharibacteria	Candidatus Saccharibacteria	Candidatus Saccharibacteria	Bacteria	0.15	https://s3-eu-west-1.amazonaws.com/sgb-genomes/data/genomes/19889/HMP_2012__SRS024021__bin.21.fa	https://s3-eu-west-1.amazonaws.com/sgb-genomes/data/eggnog/19889.tsv	https://s3-eu-west-1.amazonaws.com/sgb-genomes/data/uniref/90/19889/HMP_2012__SRS024021__bin.21.txt
HMP_2012__SRS024277__bin.57	19873	Yes	HMP_2012	SRS024277	579255	18491	42	50.34	0	N/A	N/A	Candidatus Saccharibacteria	Candidatus Saccharibacteria	Candidatus Saccharibacteria	Candidatus Saccharibacteria	Bacteria	Candidatus Saccharibacteria	Candidatus Saccharibacteria	Candidatus Saccharibacteria	Candidatus Saccharibacteria	Candidatus Saccharibacteria	Candidatus Saccharibacteria	Bacteria	0.17	https://s3-eu-west-1.amazonaws.com/sgb-genomes/data/genomes/19873/HMP_2012__SRS024277__bin.57.fa	https://s3-eu-west-1.amazonaws.com/sgb-genomes/data/eggnog/19873.tsv	https://s3-eu-west-1.amazonaws.com/sgb-genomes/data/uniref/90/19873/HMP_2012__SRS024277__bin.57.txt
Castro-NallarE_2015__ES_208__bin.22	19860	Yes	Castro-NallarE_2015	ES_208	578325	5255	130	53.79	1	N/A	N/A	Candidatus Saccharibacteria	Candidatus Saccharibacteria	Candidatus Saccharibacteria	Candidatus Saccharibacteria	Bacteria	Candidatus Saccharibacteria	Candidatus Saccharibacteria	Candidatus Saccharibacteria	Candidatus Saccharibacteria	Candidatus Saccharibacteria	Candidatus Saccharibacteria	Bacteria	0.15	https://s3-eu-west-1.amazonaws.com/sgb-genomes/data/genomes/19860/Castro-NallarE_2015__ES_208__bin.22.fa	https://s3-eu-west-1.amazonaws.com/sgb-genomes/data/eggnog/19860.tsv	https://s3-eu-west-1.amazonaws.com/sgb-genomes/data/uniref/90/19860/Castro-NallarE_2015__ES_208__bin.22.txt
HMP_2012__SRS024277__bin.2	19850	Yes	HMP_2012	SRS024277	578060	23109	32	56.51	1.85	N/A	N/A	Candidatus Saccharibacteria	Candidatus Saccharibacteria	Candidatus Saccharibacteria	Candidatus Saccharibacteria	Bacteria	Candidatus Saccharibacteria	Candidatus Saccharibacteria	Candidatus Saccharibacteria	Candidatus Saccharibacteria	Candidatus Saccharibacteria	Candidatus Saccharibacteria	Bacteria	0.15	https://s3-eu-west-1.amazonaws.com/sgb-genomes/data/genomes/19850/HMP_2012__SRS024277__bin.2.fa	https://s3-eu-west-1.amazonaws.com/sgb-genomes/data/eggnog/19850.tsv	https://s3-eu-west-1.amazonaws.com/sgb-genomes/data/uniref/90/19850/HMP_2012__SRS024277__bin.2.txt
FerrettiP_2018__CA_C10019MS2313SA_t0M15__bin.13	19850	Yes	FerrettiP_2018	CA_C10019MS2313SA_t0M15	571448	11147	76	51.85	0	N/A	N/A	Candidatus Saccharibacteria	Candidatus Saccharibacteria	Candidatus Saccharibacteria	Candidatus Saccharibacteria	Bacteria	Candidatus Saccharibacteria	Candidatus Saccharibacteria	Candidatus Saccharibacteria	Candidatus Saccharibacteria	Candidatus Saccharibacteria	Candidatus Saccharibacteria	Bacteria	0.15	https://s3-eu-west-1.amazonaws.com/sgb-genomes/data/genomes/19850/FerrettiP_2018__CA_C10019MS2313SA_t0M15__bin.13.fa	https://s3-eu-west-1.amazonaws.com/sgb-genomes/data/eggnog/19850.tsv	https://s3-eu-west-1.amazonaws.com/sgb-genomes/data/uniref/90/19850/FerrettiP_2018__CA_C10019MS2313SA_t0M15__bin.13.txt
HMP_2012__SRS050669__bin.61	19850	Yes	HMP_2012	SRS050669	571432	13101	57	51.3	3.24	N/A	N/A	Candidatus Saccharibacteria	Candidatus Saccharibacteria	Candidatus Saccharibacteria	Candidatus Saccharibacteria	Bacteria	Candidatus Saccharibacteria	Candidatus Saccharibacteria	Candidatus Saccharibacteria	Candidatus Saccharibacteria	Candidatus Saccharibacteria	Candidatus Saccharibacteria	Bacteria	0.15	https://s3-eu-west-1.amazonaws.com/sgb-genomes/data/genomes/19850/HMP_2012__SRS050669__bin.61.fa	https://s3-eu-west-1.amazonaws.com/sgb-genomes/data/eggnog/19850.tsv	https://s3-eu-west-1.amazonaws.com/sgb-genomes/data/uniref/90/19850/HMP_2012__SRS050669__bin.61.txt
Castro-NallarE_2015__ES_137__bin.4	19870	Yes	Castro-NallarE_2015	ES_137	563213	5711	118	54.32	0	N/A	N/A	Candidatus Saccharibacteria	Candidatus Saccharibacteria	Candidatus Saccharibacteria	Candidatus Saccharibacteria	Bacteria	Candidatus Saccharibacteria	Candidatus Saccharibacteria	Candidatus Saccharibacteria	Candidatus Saccharibacteria	Candidatus Saccharibacteria	Candidatus Saccharibacteria	Bacteria	0.16	https://s3-eu-west-1.amazonaws.com/sgb-genomes/data/genomes/19870/Castro-NallarE_2015__ES_137__bin.4.fa	https://s3-eu-west-1.amazonaws.com/sgb-genomes/data/eggnog/19870.tsv	https://s3-eu-west-1.amazonaws.com/sgb-genomes/data/uniref/90/19870/Castro-NallarE_2015__ES_137__bin.4.txt
HMP_2012__SRS051791__bin.17	19850	Yes	HMP_2012	SRS051791	562916	30411	33	51.54	0.93	N/A	N/A	Candidatus Saccharibacteria	Candidatus Saccharibacteria	Candidatus Saccharibacteria	Candidatus Saccharibacteria	Bacteria	Candidatus Saccharibacteria	Candidatus Saccharibacteria	Candidatus Saccharibacteria	Candidatus Saccharibacteria	Candidatus Saccharibacteria	Candidatus Saccharibacteria	Bacteria	0.15	https://s3-eu-west-1.amazonaws.com/sgb-genomes/data/genomes/19850/HMP_2012__SRS051791__bin.17.fa	https://s3-eu-west-1.amazonaws.com/sgb-genomes/data/eggnog/19850.tsv	https://s3-eu-west-1.amazonaws.com/sgb-genomes/data/uniref/90/19850/HMP_2012__SRS051791__bin.17.txt
HMP_2012__SRS014690__bin.20	19894	Yes	HMP_2012	SRS014690	562489	9927	70	52.21	0	N/A	N/A	Candidatus Saccharibacteria	Candidatus Saccharibacteria	Candidatus Saccharibacteria	Candidatus Saccharibacteria	Bacteria	Candidatus Saccharibacteria	Candidatus Saccharibacteria	Candidatus Saccharibacteria	Candidatus Saccharibacteria	Candidatus Saccharibacteria	Candidatus Saccharibacteria	Bacteria	0.16	https://s3-eu-west-1.amazonaws.com/sgb-genomes/data/genomes/19894/HMP_2012__SRS014690__bin.20.fa	https://s3-eu-west-1.amazonaws.com/sgb-genomes/data/eggnog/19894.tsv	https://s3-eu-west-1.amazonaws.com/sgb-genomes/data/uniref/90/19894/HMP_2012__SRS014690__bin.20.txt
HMP_2012__SRS052876__bin.48	19891	Yes	HMP_2012	SRS052876	556366	11727	64	50.19	2.78	N/A	N/A	Candidatus Saccharibacteria	Candidatus Saccharibacteria	Candidatus Saccharibacteria	Candidatus Saccharibacteria	Bacteria	Candidatus Saccharibacteria	Candidatus Saccharibacteria	Candidatus Saccharibacteria	Candidatus Saccharibacteria	Candidatus Saccharibacteria	Candidatus Saccharibacteria	Bacteria	0.16	https://s3-eu-west-1.amazonaws.com/sgb-genomes/data/genomes/19891/HMP_2012__SRS052876__bin.48.fa	https://s3-eu-west-1.amazonaws.com/sgb-genomes/data/eggnog/19891.tsv	https://s3-eu-west-1.amazonaws.com/sgb-genomes/data/uniref/90/19891/HMP_2012__SRS052876__bin.48.txt
BritoIL_2016__WL.43.SA__bin.3	19858	Yes	BritoIL_2016	WL.43.SA	553847	4059	148	54.81	2.23	N/A	N/A	Candidatus Saccharibacteria	Candidatus Saccharibacteria	Candidatus Saccharibacteria	Candidatus Saccharibacteria	Bacteria	Candidatus Saccharibacteria	Candidatus Saccharibacteria	Candidatus Saccharibacteria	Candidatus Saccharibacteria	Candidatus Saccharibacteria	Candidatus Saccharibacteria	Bacteria	0.16	https://s3-eu-west-1.amazonaws.com/sgb-genomes/data/genomes/19858/BritoIL_2016__WL.43.SA__bin.3.fa	https://s3-eu-west-1.amazonaws.com/sgb-genomes/data/eggnog/19858.tsv	https://s3-eu-west-1.amazonaws.com/sgb-genomes/data/uniref/90/19858/BritoIL_2016__WL.43.SA__bin.3.txt
HMP_2012__SRS044662__bin.18	19850	Yes	HMP_2012	SRS044662	545936	147261	8	53.56	0	N/A	N/A	Candidatus Saccharibacteria	Candidatus Saccharibacteria	Candidatus Saccharibacteria	Candidatus Saccharibacteria	Bacteria	Candidatus Saccharibacteria	Candidatus Saccharibacteria	Candidatus Saccharibacteria	Candidatus Saccharibacteria	Candidatus Saccharibacteria	Candidatus Saccharibacteria	Bacteria	0.15	https://s3-eu-west-1.amazonaws.com/sgb-genomes/data/genomes/19850/HMP_2012__SRS044662__bin.18.fa	https://s3-eu-west-1.amazonaws.com/sgb-genomes/data/eggnog/19850.tsv	https://s3-eu-west-1.amazonaws.com/sgb-genomes/data/uniref/90/19850/HMP_2012__SRS044662__bin.18.txt
FerrettiP_2018__CA_C10055MS2957SA_t0M16__bin.15	19860	Yes	FerrettiP_2018	CA_C10055MS2957SA_t0M16	539996	14271	54	55.21	0	N/A	N/A	Candidatus Saccharibacteria	Candidatus Saccharibacteria	Candidatus Saccharibacteria	Candidatus Saccharibacteria	Bacteria	Candidatus Saccharibacteria	Candidatus Saccharibacteria	Candidatus Saccharibacteria	Candidatus Saccharibacteria	Candidatus Saccharibacteria	Candidatus Saccharibacteria	Bacteria	0.15	https://s3-eu-west-1.amazonaws.com/sgb-genomes/data/genomes/19860/FerrettiP_2018__CA_C10055MS2957SA_t0M16__bin.15.fa	https://s3-eu-west-1.amazonaws.com/sgb-genomes/data/eggnog/19860.tsv	https://s3-eu-west-1.amazonaws.com/sgb-genomes/data/uniref/90/19860/FerrettiP_2018__CA_C10055MS2957SA_t0M16__bin.15.txt
HMP_2012__SRS018591__bin.34	19851	Yes	HMP_2012	SRS018591	537912	13055	64	52.78	1.85	N/A	N/A	Candidatus Saccharibacteria	Candidatus Saccharibacteria	Candidatus Saccharibacteria	Candidatus Saccharibacteria	Bacteria	Candidatus Saccharibacteria	Candidatus Saccharibacteria	Candidatus Saccharibacteria	Candidatus Saccharibacteria	Candidatus Saccharibacteria	Candidatus Saccharibacteria	Bacteria	0.16	https://s3-eu-west-1.amazonaws.com/sgb-genomes/data/genomes/19851/HMP_2012__SRS018591__bin.34.fa	https://s3-eu-west-1.amazonaws.com/sgb-genomes/data/eggnog/19851.tsv	https://s3-eu-west-1.amazonaws.com/sgb-genomes/data/uniref/90/19851/HMP_2012__SRS018591__bin.34.txt
HMP_2012__SRS018443__bin.32	19910	Yes	HMP_2012	SRS018443	537092	18409	44	53.69	0.85	N/A	N/A	Candidatus Saccharibacteria	Candidatus Saccharibacteria	Candidatus Saccharibacteria	Candidatus Saccharibacteria	Bacteria	Candidatus Saccharibacteria	Candidatus Saccharibacteria	Candidatus Saccharibacteria	Candidatus Saccharibacteria	Candidatus Saccharibacteria	Candidatus Saccharibacteria	Bacteria	0.13	https://s3-eu-west-1.amazonaws.com/sgb-genomes/data/genomes/19910/HMP_2012__SRS018443__bin.32.fa	https://s3-eu-west-1.amazonaws.com/sgb-genomes/data/eggnog/19910.tsv	https://s3-eu-west-1.amazonaws.com/sgb-genomes/data/uniref/90/19910/HMP_2012__SRS018443__bin.32.txt
HMP_2012__SRS049318__bin.78	19921	Yes	HMP_2012	SRS049318	536716	405462	4	50.15	2.78	N/A	N/A	Candidatus Saccharibacteria	Candidatus Saccharibacteria	Candidatus Saccharibacteria	Candidatus Saccharibacteria	Bacteria	Candidatus Saccharibacteria	Candidatus Saccharibacteria	Candidatus Saccharibacteria	Candidatus Saccharibacteria	Candidatus Saccharibacteria	Candidatus Saccharibacteria	Bacteria	0.27	https://s3-eu-west-1.amazonaws.com/sgb-genomes/data/genomes/19921/HMP_2012__SRS049318__bin.78.fa	https://s3-eu-west-1.amazonaws.com/sgb-genomes/data/eggnog/19921.tsv	https://s3-eu-west-1.amazonaws.com/sgb-genomes/data/uniref/90/19921/HMP_2012__SRS049318__bin.78.txt
HMP_2012__SRS057692__bin.35	19850	Yes	HMP_2012	SRS057692	534326	20196	61	54.51	0	N/A	N/A	Candidatus Saccharibacteria	Candidatus Saccharibacteria	Candidatus Saccharibacteria	Candidatus Saccharibacteria	Bacteria	Candidatus Saccharibacteria	Candidatus Saccharibacteria	Candidatus Saccharibacteria	Candidatus Saccharibacteria	Candidatus Saccharibacteria	Candidatus Saccharibacteria	Bacteria	0.15	https://s3-eu-west-1.amazonaws.com/sgb-genomes/data/genomes/19850/HMP_2012__SRS057692__bin.35.fa	https://s3-eu-west-1.amazonaws.com/sgb-genomes/data/eggnog/19850.tsv	https://s3-eu-west-1.amazonaws.com/sgb-genomes/data/uniref/90/19850/HMP_2012__SRS057692__bin.35.txt
HMP_2012__SRS062878__bin.1	19850	Yes	HMP_2012	SRS062878	534169	9852	76	51.44	0	N/A	N/A	Candidatus Saccharibacteria	Candidatus Saccharibacteria	Candidatus Saccharibacteria	Candidatus Saccharibacteria	Bacteria	Candidatus Saccharibacteria	Candidatus Saccharibacteria	Candidatus Saccharibacteria	Candidatus Saccharibacteria	Candidatus Saccharibacteria	Candidatus Saccharibacteria	Bacteria	0.15	https://s3-eu-west-1.amazonaws.com/sgb-genomes/data/genomes/19850/HMP_2012__SRS062878__bin.1.fa	https://s3-eu-west-1.amazonaws.com/sgb-genomes/data/eggnog/19850.tsv	https://s3-eu-west-1.amazonaws.com/sgb-genomes/data/uniref/90/19850/HMP_2012__SRS062878__bin.1.txt
HMP_2012__SRS024649__bin.42	19898	Yes	HMP_2012	SRS024649	533995	132377	9	50.43	0	N/A	N/A	Candidatus Saccharibacteria	Candidatus Saccharibacteria	Candidatus Saccharibacteria	Candidatus Saccharibacteria	Bacteria	Candidatus Saccharibacteria	Candidatus Saccharibacteria	Candidatus Saccharibacteria	Candidatus Saccharibacteria	Candidatus Saccharibacteria	Candidatus Saccharibacteria	Bacteria	0.16	https://s3-eu-west-1.amazonaws.com/sgb-genomes/data/genomes/19898/HMP_2012__SRS024649__bin.42.fa	https://s3-eu-west-1.amazonaws.com/sgb-genomes/data/eggnog/19898.tsv	https://s3-eu-west-1.amazonaws.com/sgb-genomes/data/uniref/90/19898/HMP_2012__SRS024649__bin.42.txt
HMP_2012__SRS024087__bin.68	19903	Yes	HMP_2012	SRS024087	531807	14941	51	57.21	0	N/A	N/A	Candidatus Saccharibacteria	Candidatus Saccharibacteria	Candidatus Saccharibacteria	Candidatus Saccharibacteria	Bacteria	Candidatus Saccharibacteria	Candidatus Saccharibacteria	Candidatus Saccharibacteria	Candidatus Saccharibacteria	Candidatus Saccharibacteria	Candidatus Saccharibacteria	Bacteria	0.19	https://s3-eu-west-1.amazonaws.com/sgb-genomes/data/genomes/19903/HMP_2012__SRS024087__bin.68.fa	https://s3-eu-west-1.amazonaws.com/sgb-genomes/data/eggnog/19903.tsv	https://s3-eu-west-1.amazonaws.com/sgb-genomes/data/uniref/90/19903/HMP_2012__SRS024087__bin.68.txt
HMP_2012__SRS016002__bin.20	19865	Yes	HMP_2012	SRS016002	530513	22359	39	67.74	0	N/A	N/A	Candidatus Saccharibacteria	Candidatus Saccharibacteria	Candidatus Saccharibacteria	Candidatus Saccharibacteria	Bacteria	Candidatus Saccharibacteria	Candidatus Saccharibacteria	Candidatus Saccharibacteria	Candidatus Saccharibacteria	Candidatus Saccharibacteria	Candidatus Saccharibacteria	Bacteria	0.17	https://s3-eu-west-1.amazonaws.com/sgb-genomes/data/genomes/19865/HMP_2012__SRS016002__bin.20.fa	https://s3-eu-west-1.amazonaws.com/sgb-genomes/data/eggnog/19865.tsv	https://s3-eu-west-1.amazonaws.com/sgb-genomes/data/uniref/90/19865/HMP_2012__SRS016002__bin.20.txt
HMP_2012__SRS063932__bin.51	19903	Yes	HMP_2012	SRS063932	529815	33339	22	50.86	0	N/A	N/A	Candidatus Saccharibacteria	Candidatus Saccharibacteria	Candidatus Saccharibacteria	Candidatus Saccharibacteria	Bacteria	Candidatus Saccharibacteria	Candidatus Saccharibacteria	Candidatus Saccharibacteria	Candidatus Saccharibacteria	Candidatus Saccharibacteria	Candidatus Saccharibacteria	Bacteria	0.19	https://s3-eu-west-1.amazonaws.com/sgb-genomes/data/genomes/19903/HMP_2012__SRS063932__bin.51.fa	https://s3-eu-west-1.amazonaws.com/sgb-genomes/data/eggnog/19903.tsv	https://s3-eu-west-1.amazonaws.com/sgb-genomes/data/uniref/90/19903/HMP_2012__SRS063932__bin.51.txt
HMP_2012__SRS022602__bin.37	19880	Yes	HMP_2012	SRS022602	524460	75544	12	50.46	0	N/A	N/A	Candidatus Saccharibacteria	Candidatus Saccharibacteria	Candidatus Saccharibacteria	Candidatus Saccharibacteria	Bacteria	Candidatus Saccharibacteria	Candidatus Saccharibacteria	Candidatus Saccharibacteria	Candidatus Saccharibacteria	Candidatus Saccharibacteria	Candidatus Saccharibacteria	Bacteria	0.23	https://s3-eu-west-1.amazonaws.com/sgb-genomes/data/genomes/19880/HMP_2012__SRS022602__bin.37.fa	https://s3-eu-west-1.amazonaws.com/sgb-genomes/data/eggnog/19880.tsv	https://s3-eu-west-1.amazonaws.com/sgb-genomes/data/uniref/90/19880/HMP_2012__SRS022602__bin.37.txt
HMP_2012__SRS019974__bin.9	19864	Yes	HMP_2012	SRS019974	513531	9675	74	59.64	0	N/A	N/A	Candidatus Saccharibacteria	Candidatus Saccharibacteria	Candidatus Saccharibacteria	Candidatus Saccharibacteria	Bacteria	Candidatus Saccharibacteria	Candidatus Saccharibacteria	Candidatus Saccharibacteria	Candidatus Saccharibacteria	Candidatus Saccharibacteria	Candidatus Saccharibacteria	Bacteria	0.16	https://s3-eu-west-1.amazonaws.com/sgb-genomes/data/genomes/19864/HMP_2012__SRS019974__bin.9.fa	https://s3-eu-west-1.amazonaws.com/sgb-genomes/data/eggnog/19864.tsv	https://s3-eu-west-1.amazonaws.com/sgb-genomes/data/uniref/90/19864/HMP_2012__SRS019974__bin.9.txt
HMP_2012__SRS024138__bin.9	19872	Yes	HMP_2012	SRS024138	506221	5879	102	62.67	0	N/A	N/A	Candidatus Saccharibacteria	Candidatus Saccharibacteria	Candidatus Saccharibacteria	Candidatus Saccharibacteria	Bacteria	Candidatus Saccharibacteria	Candidatus Saccharibacteria	Candidatus Saccharibacteria	Candidatus Saccharibacteria	Candidatus Saccharibacteria	Candidatus Saccharibacteria	Bacteria	0.17	https://s3-eu-west-1.amazonaws.com/sgb-genomes/data/genomes/19872/HMP_2012__SRS024138__bin.9.fa	https://s3-eu-west-1.amazonaws.com/sgb-genomes/data/eggnog/19872.tsv	https://s3-eu-west-1.amazonaws.com/sgb-genomes/data/uniref/90/19872/HMP_2012__SRS024138__bin.9.txt
Castro-NallarE_2015__ES_106__bin.12	19850	Yes	Castro-NallarE_2015	ES_106	501198	7256	88	50.81	0.93	N/A	N/A	Candidatus Saccharibacteria	Candidatus Saccharibacteria	Candidatus Saccharibacteria	Candidatus Saccharibacteria	Bacteria	Candidatus Saccharibacteria	Candidatus Saccharibacteria	Candidatus Saccharibacteria	Candidatus Saccharibacteria	Candidatus Saccharibacteria	Candidatus Saccharibacteria	Bacteria	0.15	https://s3-eu-west-1.amazonaws.com/sgb-genomes/data/genomes/19850/Castro-NallarE_2015__ES_106__bin.12.fa	https://s3-eu-west-1.amazonaws.com/sgb-genomes/data/eggnog/19850.tsv	https://s3-eu-west-1.amazonaws.com/sgb-genomes/data/uniref/90/19850/Castro-NallarE_2015__ES_106__bin.12.txt
HMP_2012__SRS015209__bin.35	19868	Yes	HMP_2012	SRS015209	499769	252061	6	56.9	0	N/A	N/A	Candidatus Saccharibacteria	Candidatus Saccharibacteria	Candidatus Saccharibacteria	Candidatus Saccharibacteria	Bacteria	Candidatus Saccharibacteria	Candidatus Saccharibacteria	Candidatus Saccharibacteria	Candidatus Saccharibacteria	Candidatus Saccharibacteria	Candidatus Saccharibacteria	Bacteria	0.15	https://s3-eu-west-1.amazonaws.com/sgb-genomes/data/genomes/19868/HMP_2012__SRS015209__bin.35.fa	https://s3-eu-west-1.amazonaws.com/sgb-genomes/data/eggnog/19868.tsv	https://s3-eu-west-1.amazonaws.com/sgb-genomes/data/uniref/90/19868/HMP_2012__SRS015209__bin.35.txt
HMP_2012__SRS057791__bin.60	19874	Yes	HMP_2012	SRS057791	498920	123589	6	52.56	0.85	N/A	N/A	Candidatus Saccharibacteria	Candidatus Saccharibacteria	Candidatus Saccharibacteria	Candidatus Saccharibacteria	Bacteria	Candidatus Saccharibacteria	Candidatus Saccharibacteria	Candidatus Saccharibacteria	Candidatus Saccharibacteria	Candidatus Saccharibacteria	Candidatus Saccharibacteria	Bacteria	0.16	https://s3-eu-west-1.amazonaws.com/sgb-genomes/data/genomes/19874/HMP_2012__SRS057791__bin.60.fa	https://s3-eu-west-1.amazonaws.com/sgb-genomes/data/eggnog/19874.tsv	https://s3-eu-west-1.amazonaws.com/sgb-genomes/data/uniref/90/19874/HMP_2012__SRS057791__bin.60.txt
YuJ_2015__SZAXPI003424-12__bin.23	19860	Yes	YuJ_2015	SZAXPI003424-12	494332	5880	95	53.33	0	N/A	N/A	Candidatus Saccharibacteria	Candidatus Saccharibacteria	Candidatus Saccharibacteria	Candidatus Saccharibacteria	Bacteria	Candidatus Saccharibacteria	Candidatus Saccharibacteria	Candidatus Saccharibacteria	Candidatus Saccharibacteria	Candidatus Saccharibacteria	Candidatus Saccharibacteria	Bacteria	0.15	https://s3-eu-west-1.amazonaws.com/sgb-genomes/data/genomes/19860/YuJ_2015__SZAXPI003424-12__bin.23.fa	https://s3-eu-west-1.amazonaws.com/sgb-genomes/data/eggnog/19860.tsv	https://s3-eu-west-1.amazonaws.com/sgb-genomes/data/uniref/90/19860/YuJ_2015__SZAXPI003424-12__bin.23.txt
HMP_2012__SRS018300__bin.34	19877	Yes	HMP_2012	SRS018300	485414	7189	81	52	4.46	N/A	N/A	Candidatus Saccharibacteria	Candidatus Saccharibacteria	Candidatus Saccharibacteria	Candidatus Saccharibacteria	Bacteria	Candidatus Saccharibacteria	Candidatus Saccharibacteria	Candidatus Saccharibacteria	Candidatus Saccharibacteria	Candidatus Saccharibacteria	Candidatus Saccharibacteria	Bacteria	0.17	https://s3-eu-west-1.amazonaws.com/sgb-genomes/data/genomes/19877/HMP_2012__SRS018300__bin.34.fa	https://s3-eu-west-1.amazonaws.com/sgb-genomes/data/eggnog/19877.tsv	https://s3-eu-west-1.amazonaws.com/sgb-genomes/data/uniref/90/19877/HMP_2012__SRS018300__bin.34.txt
HMP_2012__SRS019980__bin.30	19900	Yes	HMP_2012	SRS019980	479003	304862	2	51.72	0	N/A	N/A	Candidatus Saccharibacteria	Candidatus Saccharibacteria	Candidatus Saccharibacteria	Candidatus Saccharibacteria	Bacteria	Candidatus Saccharibacteria	Candidatus Saccharibacteria	Candidatus Saccharibacteria	Candidatus Saccharibacteria	Candidatus Saccharibacteria	Candidatus Saccharibacteria	Bacteria	0.16	https://s3-eu-west-1.amazonaws.com/sgb-genomes/data/genomes/19900/HMP_2012__SRS019980__bin.30.fa	https://s3-eu-west-1.amazonaws.com/sgb-genomes/data/eggnog/19900.tsv	https://s3-eu-west-1.amazonaws.com/sgb-genomes/data/uniref/90/19900/HMP_2012__SRS019980__bin.30.txt
HMP_2012__SRS016342__bin.3	19863	Yes	HMP_2012	SRS016342	474520	7446	86	52.23	0	N/A	N/A	Candidatus Saccharibacteria	Candidatus Saccharibacteria	Candidatus Saccharibacteria	Candidatus Saccharibacteria	Bacteria	Candidatus Saccharibacteria	Candidatus Saccharibacteria	Candidatus Saccharibacteria	Candidatus Saccharibacteria	Candidatus Saccharibacteria	Candidatus Saccharibacteria	Bacteria	0.16	https://s3-eu-west-1.amazonaws.com/sgb-genomes/data/genomes/19863/HMP_2012__SRS016342__bin.3.fa	https://s3-eu-west-1.amazonaws.com/sgb-genomes/data/eggnog/19863.tsv	https://s3-eu-west-1.amazonaws.com/sgb-genomes/data/uniref/90/19863/HMP_2012__SRS016342__bin.3.txt
HMP_2012__SRS047210__bin.33	19869	Yes	HMP_2012	SRS047210	446445	7635	76	54.86	0	N/A	N/A	Candidatus Saccharibacteria	Candidatus Saccharibacteria	Candidatus Saccharibacteria	Candidatus Saccharibacteria	Bacteria	Candidatus Saccharibacteria	Candidatus Saccharibacteria	Candidatus Saccharibacteria	Candidatus Saccharibacteria	Candidatus Saccharibacteria	Candidatus Saccharibacteria	Bacteria	0.16	https://s3-eu-west-1.amazonaws.com/sgb-genomes/data/genomes/19869/HMP_2012__SRS047210__bin.33.fa	https://s3-eu-west-1.amazonaws.com/sgb-genomes/data/eggnog/19869.tsv	https://s3-eu-west-1.amazonaws.com/sgb-genomes/data/uniref/90/19869/HMP_2012__SRS047210__bin.33.txt
HMP_2012__SRS024087__bin.73	19850	Yes	HMP_2012	SRS024087	443792	5430	96	59.12	1.72	N/A	N/A	Candidatus Saccharibacteria	Candidatus Saccharibacteria	Candidatus Saccharibacteria	Candidatus Saccharibacteria	Bacteria	Candidatus Saccharibacteria	Candidatus Saccharibacteria	Candidatus Saccharibacteria	Candidatus Saccharibacteria	Candidatus Saccharibacteria	Candidatus Saccharibacteria	Bacteria	0.15	https://s3-eu-west-1.amazonaws.com/sgb-genomes/data/genomes/19850/HMP_2012__SRS024087__bin.73.fa	https://s3-eu-west-1.amazonaws.com/sgb-genomes/data/eggnog/19850.tsv	https://s3-eu-west-1.amazonaws.com/sgb-genomes/data/uniref/90/19850/HMP_2012__SRS024087__bin.73.txt
HMP_2012__SRS015057__bin.3	19859	Yes	HMP_2012	SRS015057	430940	6903	79	54.62	1.72	N/A	N/A	Candidatus Saccharibacteria	Candidatus Saccharibacteria	Candidatus Saccharibacteria	Candidatus Saccharibacteria	Bacteria	Candidatus Saccharibacteria	Candidatus Saccharibacteria	Candidatus Saccharibacteria	Candidatus Saccharibacteria	Candidatus Saccharibacteria	Candidatus Saccharibacteria	Bacteria	0.17	https://s3-eu-west-1.amazonaws.com/sgb-genomes/data/genomes/19859/HMP_2012__SRS015057__bin.3.fa	https://s3-eu-west-1.amazonaws.com/sgb-genomes/data/eggnog/19859.tsv	https://s3-eu-west-1.amazonaws.com/sgb-genomes/data/uniref/90/19859/HMP_2012__SRS015057__bin.3.txt
HMP_2012__SRS011126__bin.58	19893	Yes	HMP_2012	SRS011126	428769	5607	85	50.86	0	N/A	N/A	Candidatus Saccharibacteria	Candidatus Saccharibacteria	Candidatus Saccharibacteria	Candidatus Saccharibacteria	Bacteria	Candidatus Saccharibacteria	Candidatus Saccharibacteria	Candidatus Saccharibacteria	Candidatus Saccharibacteria	Candidatus Saccharibacteria	Candidatus Saccharibacteria	Bacteria	0.16	https://s3-eu-west-1.amazonaws.com/sgb-genomes/data/genomes/19893/HMP_2012__SRS011126__bin.58.fa	https://s3-eu-west-1.amazonaws.com/sgb-genomes/data/eggnog/19893.tsv	https://s3-eu-west-1.amazonaws.com/sgb-genomes/data/uniref/90/19893/HMP_2012__SRS011126__bin.58.txt
CM_periimplantitis__SP_344SPT_T016__bin.25	19912	Yes	CM_periimplantitis	SP_344SPT_T016	420912	104345	5	57.07	0	N/A	N/A	Candidatus Saccharibacteria	Candidatus Saccharibacteria	Candidatus Saccharibacteria	Candidatus Saccharibacteria	Bacteria	Candidatus Saccharibacteria	Candidatus Saccharibacteria	Candidatus Saccharibacteria	Candidatus Saccharibacteria	Candidatus Saccharibacteria	Candidatus Saccharibacteria	Bacteria	0.14	https://s3-eu-west-1.amazonaws.com/sgb-genomes/data/genomes/19912/CM_periimplantitis__SP_344SPT_T016__bin.25.fa	https://s3-eu-west-1.amazonaws.com/sgb-genomes/data/eggnog/19912.tsv	https://s3-eu-west-1.amazonaws.com/sgb-genomes/data/uniref/90/19912/CM_periimplantitis__SP_344SPT_T016__bin.25.txt
HMP_2012__SRS012279__bin.62	19879	Yes	HMP_2012	SRS012279	412589	8170	63	55.38	0	N/A	N/A	Candidatus Saccharibacteria	Candidatus Saccharibacteria	Candidatus Saccharibacteria	Candidatus Saccharibacteria	Bacteria	Candidatus Saccharibacteria	Candidatus Saccharibacteria	Candidatus Saccharibacteria	Candidatus Saccharibacteria	Candidatus Saccharibacteria	Candidatus Saccharibacteria	Bacteria	0.17	https://s3-eu-west-1.amazonaws.com/sgb-genomes/data/genomes/19879/HMP_2012__SRS012279__bin.62.fa	https://s3-eu-west-1.amazonaws.com/sgb-genomes/data/eggnog/19879.tsv	https://s3-eu-west-1.amazonaws.com/sgb-genomes/data/uniref/90/19879/HMP_2012__SRS012279__bin.62.txt
HMP_2012__SRS045715__bin.19	19878	Yes	HMP_2012	SRS045715	412073	5153	95	51.15	1.72	N/A	N/A	Candidatus Saccharibacteria	Candidatus Saccharibacteria	Candidatus Saccharibacteria	Candidatus Saccharibacteria	Bacteria	Candidatus Saccharibacteria	Candidatus Saccharibacteria	Candidatus Saccharibacteria	Candidatus Saccharibacteria	Candidatus Saccharibacteria	Candidatus Saccharibacteria	Bacteria	0.18	https://s3-eu-west-1.amazonaws.com/sgb-genomes/data/genomes/19878/HMP_2012__SRS045715__bin.19.fa	https://s3-eu-west-1.amazonaws.com/sgb-genomes/data/eggnog/19878.tsv	https://s3-eu-west-1.amazonaws.com/sgb-genomes/data/uniref/90/19878/HMP_2012__SRS045715__bin.19.txt
HMP_2012__SRS016331__bin.31	19899	Yes	HMP_2012	SRS016331	409589	5314	88	56.32	0	N/A	N/A	Candidatus Saccharibacteria	Candidatus Saccharibacteria	Candidatus Saccharibacteria	Candidatus Saccharibacteria	Bacteria	Candidatus Saccharibacteria	Candidatus Saccharibacteria	Candidatus Saccharibacteria	Candidatus Saccharibacteria	Candidatus Saccharibacteria	Candidatus Saccharibacteria	Bacteria	0.19	https://s3-eu-west-1.amazonaws.com/sgb-genomes/data/genomes/19899/HMP_2012__SRS016331__bin.31.fa	https://s3-eu-west-1.amazonaws.com/sgb-genomes/data/eggnog/19899.tsv	https://s3-eu-west-1.amazonaws.com/sgb-genomes/data/uniref/90/19899/HMP_2012__SRS016331__bin.31.txt
HMP_2012__SRS062544__bin.27	19861	Yes	HMP_2012	SRS062544	405882	30992	27	61.49	0	N/A	N/A	Candidatus Saccharibacteria	Candidatus Saccharibacteria	Candidatus Saccharibacteria	Candidatus Saccharibacteria	Bacteria	Candidatus Saccharibacteria	Candidatus Saccharibacteria	Candidatus Saccharibacteria	Candidatus Saccharibacteria	Candidatus Saccharibacteria	Candidatus Saccharibacteria	Bacteria	0.18	https://s3-eu-west-1.amazonaws.com/sgb-genomes/data/genomes/19861/HMP_2012__SRS062544__bin.27.fa	https://s3-eu-west-1.amazonaws.com/sgb-genomes/data/eggnog/19861.tsv	https://s3-eu-west-1.amazonaws.com/sgb-genomes/data/uniref/90/19861/HMP_2012__SRS062544__bin.27.txt
