# Supplementary material for: Accurate and complete genomes from metagenomes
Source: Genome Res. 2020 Mar;30(3):315–33. doi: 10.1101/gr.258640.119 (PMC7111523; doi:10.1101/gr.258640.119)
Supplement: Supplemental Material [file supp_gr.258640.119_Supplemental_Table_S3.xlsx]

## Sheet: Table S3
Table S3. Blastp results for protein sequences from the contamination contigs.
gene_caller_id	Best hit on NCBI	Percent alignment	Percent identity	Accession	Contig_name
671	Veillonella parvula	1	1	WP_119562872	HMP_2012__SRS023938__bin_39_000000000021
672	Veillonella parvula	1	0.9876	WP_004693503
673	Veillonella parvula	1	0.9529	WP_077708340
674	Veillonella dispar	1	0.9589	HCK95850
675	Veillonella dispar	1.0149	0.8998	WP_005386931
676	Veillonella sp. 3_1_44	1	0.9551	WP_008713750
677	Veillonella sp. S13053-19	0.9917	0.916	WP_105097873
678	Veillonella sp. 3_1_44	1	0.8633	WP_038125339
679	Veillonella sp. 3_1_44	1	0.9263	WP_008713746
680	Anaerovibrio sp.	1	0.8036	HAQ55274
681	Agathobaculum desmolans	1	0.8511	WP_031476611
682	Veillonella sp. S13053-19	0.9988	0.925	WP_105097867
683	Veillonella sp. S13053-19	1	0.7681	WP_105097866
684	Veillonella tobetsuensis	1	0.9825	GCL68182
685	Veillonella sp. DORA_B_18_19_23	0.9111	0.9268	ETI97371
743	NO SIGNIFICANT HIT				HMP_2012__SRS023938__bin_39_000000000028
744	Eubacterium limosum	0.9968	0.7106	WP_074617460
745	Megasphaera paucivorans	0.8676	0.5763	WP_091650408
746	Selenomonas ruminantium	0.9645	0.5217	SFB12164
747	Selenomonas artemidis	0.9972	0.6543	WP_026762034
748	Selenomonas artemidis F0399	1.0017	0.6352	EFW29141
749	Selenomonas artemidis	0.9959	0.5143	WP_026762038
750	Selenomonas artemidis	0.9944	0.5725	WP_026762039
751	Clostridium sp. CAG:632	0.9841	0.7945	CCY59202
833	Veillonella parvula	1	0.9335	WP_012864727	HMP_2012__SRS023938__bin_39_000000000042
834	Veillonella sp. AM51-8BH	1	0.9139	WP_119207297
835	Veillonella sp. ICM51a	0.9769	0.9493	WP_038124653
841	Veillonella dispar DORA_11	1	0.9981	ETI98543	HMP_2012__SRS023938__bin_39_000000000044
842	Veillonella dispar DORA_11	1	1	ETI98544
843	Veillonella dispar DORA_11	1	1	ETI98545
844	Veillonella dispar DORA_11	1	1	ETI98546
845	Veillonella dispar DORA_11	1	1	ETI98547
846	Veillonella dispar DORA_11	0.9921	0.9841	ETI98548
847	Veillonella sp. 6_1_27	1	0.9966	WP_008601292	HMP_2012__SRS023938__bin_39_000000000045
848	Veillonella dispar DORA_11	1	0.9604	ETI97062
849	Veillonella sp. T34266-5	1	0.9691	WP_105084389	HMP_2012__SRS023938__bin_39_000000000046
850	Veillonella sp. ICM51a	1	0.9659	WP_038123801
851	Veillonella sp. ICM51a	1	0.9084	WP_038123800
852	Veillonella parvula	1	0.9579	WP_077708608
858	Veillonella parvula	1	1	WP_024062026	HMP_2012__SRS023938__bin_39_000000000048
859	Veillonella parvula	1	1	WP_024062027
860	Veillonella parvula	1	0.9971	WP_118091376
861	Veillonella parvula	1	1	WP_024062029
871	Murimonas intestini	0.989	0.6397	PWJ72632	HMP_2012__SRS023938__bin_39_000000000052
872	Megasphaera sp. ASD88	1	0.8093	WP_095629459
873	Veillonella sp. AM51-8BH	0.996	0.9602	WP_119207146
874	Veillonella sp. AS16	1	0.9231	ETS92427
878	Veillonella sp. AF36-20BH	1	1	WP_120055924	HMP_2012__SRS023938__bin_39_000000000054
879	Veillonella parvula	1	1	KXB85917
880	Veillonella sp. DORA_B_18_19_23	1	1	ETI95527
881	Veillonella parvula	0.9746	0.9862	WP_128114470	HMP_2012__SRS023938__bin_39_000000000055
882	Veillonella parvula	1	1	WP_004697643	HMP_2012__SRS023938__bin_39_000000000056
883	Veillonella sp.	1	1	RKW67537
884	Veillonella sp. 3_1_44	1	1	WP_008715127
885	Veillonella sp. 6_1_27	1	1	WP_039965423
