# Supplementary material for: Accurate and complete genomes from metagenomes
Source: Genome Res. 2020 Mar;30(3):315–33. doi: 10.1101/gr.258640.119 (PMC7111523; doi:10.1101/gr.258640.119)
Supplement: Supplemental Material [file supp_gr.258640.119_Supplemental_Table_S4.xlsx]

## Sheet: Table S4
Table S4. COG functions that uniquely appear in the contaminating contigs.
RecA-superfamily ATPase, KaiC/GvpD/RAD55 family
NDP-sugar pyrophosphorylase, includes eIF-2Bgamma, eIF-2Bepsilon, and LPS biosynthesis proteins
Ankyrin repeat
Tartrate dehydratase beta subunit/Fumarate hydratase class I, C-terminal domain
ABC-type oligopeptide transport system, ATPase component
Uncharacterized conserved protein, contains PQ loop repeat
Lipopolysaccharide biosynthesis protein, LPS:glycosyltransferase
Putative Zn-dependent protease, contains TPR repeats
Site-specific DNA-adenine methylase
ATPase/GTPase, AAA15 family
Superfamily I DNA and/or RNA helicase
DNA-binding transcriptional regulator, MerR family
Tartrate dehydratase alpha subunit/Fumarate hydratase class I, N-terminal domain
Nitrate/nitrite transporter NarK
Flavorubredoxin
3-dehydroquinate synthetase
Quinol monooxygenase YgiN
C4-dicarboxylate transporter
Fe-S-cluster containining protein
Uncharacterized conserved protein, contains ParB-like and HNH nuclease domains
mRNA-degrading endonuclease (mRNA interferase) YafQ, toxin component of the YafQ-DinJ toxin-antitoxin module
Uncharacterized protein, DUF2075 family
Transposase InsO and inactivated derivatives
Acetolactate synthase large subunit or other thiamine pyrophosphate-requiring enzyme
DNA repair exonuclease SbcCD ATPase subunit
NAD(P)-dependent dehydrogenase, short-chain alcohol dehydrogenase family
Isopropylmalate/homocitrate/citramalate synthases
Putative flippase GtrA (transmembrane translocase of bactoprenol-linked glucose)
Large exoprotein involved in heme utilization or adhesion
Isocitrate/isopropylmalate dehydrogenase
