# Supplementary material for: Accurate and complete genomes from metagenomes
Source: Genome Res. 2020 Mar;30(3):315–33. doi: 10.1101/gr.258640.119 (PMC7111523; doi:10.1101/gr.258640.119)
Supplement: Supplemental Material [file supp_gr.258640.119_Supplemental_Table_S5.xlsx]

## Sheet: Table S5
Table S5. Coverage statistics of contigs across the 481 HMP oral metagenomes for the 11 contamination contigs and for the refined TM7 MAG. The three plaque samples from individual S022 that were used for refinement of the Pasolli MAG are highlighted with yellow background.
	Mean Coverage		Mean coverage Q2Q3		Coverage standard deviation
bins	Contamination	TM7	Contamination	TM7	Contamination	TM7
BM_HC_HMP_S005_01	0.393381	0.0350875	0.0638972	0	0.944026	0.224053
BM_HC_HMP_S006_02	0.949493	0.148644	0.644538	0.0194633	1.1164	0.52255
BM_HC_HMP_S006_03	0.797981	0.0988792	0.435317	0.00831055	1.1346	0.359249
BM_HC_HMP_S022_02	0.288496	0.0274609	0.0479262	0.000125104	0.602925	0.165647
BM_HC_HMP_S024_01	7.28556	0.0363269	6.06975	0.00378236	5.17255	0.122888
BM_HC_HMP_S024_02	18.0954	0.195809	16.4459	0.0144607	9.91982	0.477314
BM_HC_HMP_S025_02	9.58943	0.12014	8.36474	0.00396883	5.94379	0.463807
BM_HC_HMP_S036_01	12.6467	0.170807	10.7683	0.0136551	9.05974	0.528338
BM_HC_HMP_S039_02	7.35103	0.32174	6.04437	0.042586	5.89281	0.85176
BM_HC_HMP_S041_02	0.286502	0.0628016	0.111743	0.00117143	0.58727	0.31176
BM_HC_HMP_S046_01	8.46021	0.0590174	7.56493	0.00140647	5.06681	0.263083
BM_HC_HMP_S057_01	1.22487	0.229952	0.441494	0.00927052	2.07445	0.712166
BM_HC_HMP_S057_02	0.885829	0.367702	0.398642	0.0537711	1.40589	0.99211
BM_HC_HMP_S057_03	2.06847	0.334416	0.766039	0.0661626	3.66638	0.809154
BM_HC_HMP_S061_01	0.167856	0.0407055	0.0215045	0	0.370343	0.219786
BM_HC_HMP_S061_02	0.00349043	0.027397	0	0	0.023262	0.107918
BM_HC_HMP_S062_01	0.218628	0.407046	0.069371	0.0150856	0.393945	0.980154
BM_HC_HMP_S063_01	0.509391	0.518201	0.133734	0.0422908	0.938314	1.36285
BM_HC_HMP_S066_02	0.185001	0.180133	0.0665007	0.0117089	0.376454	0.623753
BM_HC_HMP_S072_01	4.10728	0.386159	3.3357	0.0543818	3.6561	1.19367
BM_HC_HMP_S072_02	0.890429	0.241294	0.317287	0.0131531	1.54628	0.698196
BM_HC_HMP_S073_02	4.44995	0.0824071	3.11278	0.00580042	4.8021	0.277569
BM_HC_HMP_S075_01	9.33706	79.0908	8.48667	81.2233	5.57477	26.1509
BM_HC_HMP_S084_01	2.98195	0.438346	2.21374	0.0387116	2.66552	0.980752
BM_HC_HMP_S084_02	3.23743	0.0701477	2.46806	0.00219267	2.70405	0.221331
BM_HC_HMP_S119_01	7.66008	0.170306	6.6617	0.013759	5.35984	0.355793
BM_HC_HMP_S138_01	8.44361	0.519032	7.25272	0.0336356	6.22702	1.09099
BM_HC_HMP_S140_01	9.31161	0.0911849	8.4973	0.0142184	5.47964	0.210567
BM_HC_HMP_S145_01	1.19824	0.0750514	0.962524	0.00457172	1.02572	0.246713
HP_HC_HMP_S082_01	3.89156	0.345845	2.25497	0.0589989	5.37374	0.757746
KG_HC_HMP_S024_01	0.148787	0.740682	0.0328099	0.0931953	0.343892	1.45829
KG_HC_HMP_S024_02	0.0567007	0.722503	0	0.0958925	0.195494	1.33806
KG_HC_HMP_S028_01	0.394372	1.53407	0.173548	0.178687	0.626325	3.15377
KG_HC_HMP_S028_02	8.34082	0.30748	7.34577	0.0300177	5.95013	0.697606
KG_HC_HMP_S030_01	0.228807	0.621087	0.0655406	0.035883	0.469062	1.48428
KG_HC_HMP_S117_01	8.40527	0.118589	7.14313	0.00426474	6.30431	0.286086
KG_HC_HMP_S140_01	4.39173	0.0779201	3.03522	0.00732352	5.23512	0.259792
KG_HC_HMP_S149_01	11.288	2.06602	9.40551	0.419114	10.1983	3.91446
KG_HC_HMP_S153_01	22.2519	1.32531	20.8539	0.471436	13.5672	2.15165
PB_HC_HMP_S024_01	7.156	0.59635	6.24162	0.110658	4.3404	1.31476
PB_HC_HMP_S030_01	11.3214	1.33783	9.56583	0.377677	8.40111	2.88783
PB_HC_HMP_S030_02	6.34923	28.614	5.27069	28.7749	5.04749	10.9699
PB_HC_HMP_S038_01	5.12201	1.75483	4.16161	1.08919	4.36288	2.24333
PB_HC_HMP_S117_01	9.52846	0.192597	8.30449	0.0211539	6.41732	0.517446
PB_HC_HMP_S117_02	3.51847	20.1979	3.04118	19.9902	2.4571	8.48197
PB_HC_HMP_S138_01	7.83354	1.50363	6.81118	1.21067	5.50805	1.46841
PB_HC_HMP_S143_01	18.7728	5.79696	17.2815	5.44932	10.873	3.39969
PB_HC_HMP_S148_01	4.98266	0.377334	4.2877	0.0383629	3.68802	0.965913
PB_HC_HMP_S152_01	32.2898	6.86484	30.6579	5.90382	13.9104	5.07442
PP_HC_HMP_S001_01	2.22298	0.216263	1.712	0.0364957	2.33251	0.553793
PP_HC_HMP_S002_01	1.31063	31.8869	0.986948	31.5017	1.34851	13.1208
PP_HC_HMP_S002_02	13.3238	53.8284	12.3857	55.1124	8.72859	23.2728
PP_HC_HMP_S003_01	12.708	16.411	12.0236	15.7556	6.6721	7.80776
PP_HC_HMP_S003_02	19.0296	45.8076	18.4198	44.8578	10.9433	23.2264
PP_HC_HMP_S004_01	13.6733	0.513884	14.011	0.143539	5.77578	1.08036
PP_HC_HMP_S005_01	1.31387	0.246151	1.05354	0.0640798	1.15067	0.592892
PP_HC_HMP_S005_02	2.36074	0.299332	1.93326	0.1345	2.06873	0.509511
PP_HC_HMP_S005_03	7.5817	0.112618	6.6211	0.012191	5.74587	0.364138
PP_HC_HMP_S006_01	6.38401	12.2539	5.88406	11.8803	3.89318	6.14864
PP_HC_HMP_S006_02	6.04321	1.48626	5.34797	1.1992	4.46236	1.4715
PP_HC_HMP_S006_03	5.80057	0.959616	5.20949	0.211309	3.57213	1.92546
PP_HC_HMP_S008_01	29.5496	0.433661	24.947	0.0558261	27.5191	1.10011
PP_HC_HMP_S010_01	1.8681	11.3176	1.30445	10.9054	1.99237	6.47884
PP_HC_HMP_S012_01	18.1825	12.1718	17.5545	11.3729	10.744	6.69833
PP_HC_HMP_S012_02	9.15612	3.35903	8.46991	2.9964	5.99606	2.47914
PP_HC_HMP_S015_01	1.17141	0.0346632	1.02435	0	0.971379	0.172801
PP_HC_HMP_S015_02	5.63232	0.262095	5.39215	0.0393976	3.95787	0.661007
PP_HC_HMP_S015_03	8.4716	0.0842698	8.23014	0.00468135	5.58543	0.280218
PP_HC_HMP_S016_01	6.72592	3.36287	6.06781	2.00645	4.11751	4.61387
PP_HC_HMP_S016_02	73.8838	0.403806	71.5458	0.107588	37.6994	0.820365
PP_HC_HMP_S017_01	6.17842	28.8285	5.67225	29.0017	3.94365	12.4133
PP_HC_HMP_S017_02	10.7376	0.127658	9.59635	0.0190029	7.0323	0.388436
PP_HC_HMP_S018_01	6.00749	104.274	5.22734	107.186	4.08595	33.7095
PP_HC_HMP_S018_02	2.12021	21.0886	1.73046	19.2321	1.8052	12.1473
PP_HC_HMP_S019_01	1.18972	0.185319	0.870057	0.0305163	1.33273	0.431484
PP_HC_HMP_S019_02	5.41063	1.49944	4.18293	1.13566	4.80196	1.63331
PP_HC_HMP_S019_03	14.5471	0.238408	12.6649	0.0410653	10.1386	0.642957
PP_HC_HMP_S020_01	9.44351	10.9989	8.60061	10.3755	5.61002	5.82615
PP_HC_HMP_S022_01	20.7223	99.3843	20.0719	101.979	9.68124	26.991
PP_HC_HMP_S022_02	31.1769	24.6585	27.5634	24.8007	19.4709	7.94849
PP_HC_HMP_S022_03	33.5608	9.65988	34.4929	9.39328	12.6266	4.3536
PP_HC_HMP_S023_01	0.398196	0.430897	0.215415	0.0881481	0.608889	0.905831
PP_HC_HMP_S024_01	15.7291	0.653254	14.1762	0.243133	9.28359	1.13038
PP_HC_HMP_S024_02	30.1498	29.1889	27.9169	29.5348	15.5089	11.1104
PP_HC_HMP_S028_01	1.62538	15.2055	1.33739	14.9415	1.46649	6.6224
PP_HC_HMP_S028_02	1.61443	0.0902305	1.24604	0.0139783	1.58383	0.250862
PP_HC_HMP_S029_01	3.16111	0.628082	2.829	0.152953	2.21152	1.42686
PP_HC_HMP_S029_02	6.20165	88.0359	5.48015	90.8562	4.59223	27.4154
PP_HC_HMP_S030_01	31.2012	4.45303	27.1717	1.2318	21.0622	9.53631
PP_HC_HMP_S030_02	47.2012	69.0498	39.6049	69.8283	34.3896	26.3076
PP_HC_HMP_S032_01	0.45585	0.571881	0.258106	0.143366	0.703765	1.04123
PP_HC_HMP_S032_02	3.96249	17.8583	3.10542	17.4829	3.26658	7.86091
PP_HC_HMP_S033_01	31.8095	3.30134	30.4555	2.59272	17.5588	3.06061
PP_HC_HMP_S033_02	11.8659	1.15282	10.6167	0.517636	7.80416	1.79188
PP_HC_HMP_S034_01	24.7936	71.0943	21.7032	73.1382	16.9787	23.6543
PP_HC_HMP_S034_02	19.53	39.4758	16.5822	38.7357	15.2111	16.9658
PP_HC_HMP_S034_03	44.1052	48.3387	37.0382	49.3613	33.9655	16.7318
PP_HC_HMP_S035_01	3.93966	0.495604	3.6331	0.0894276	2.33546	1.07204
PP_HC_HMP_S035_02	15.1901	1.69966	14.9764	0.915875	5.71381	2.67311
PP_HC_HMP_S036_01	45.0064	2.46433	39.7173	0.701114	29.0071	4.91981
PP_HC_HMP_S036_02	20.8327	2.096	17.6146	0.530626	15.2178	4.35522
PP_HC_HMP_S037_01	11.4402	1.05897	8.70296	0.809537	9.71836	1.11825
PP_HC_HMP_S037_02	24.1317	0.632069	18.7243	0.174867	19.4434	1.15315
PP_HC_HMP_S037_03	18.3417	0.273073	13.2735	0.0188563	16.5631	0.612492
PP_HC_HMP_S038_01	0.229878	0.0103235	0.092638	0	0.442542	0.045828
PP_HC_HMP_S039_01	2.76902	0.0797312	2.27821	0.0097783	2.40186	0.245997
PP_HC_HMP_S039_02	4.81716	0.177527	3.8321	0.0244188	4.25451	0.48477
PP_HC_HMP_S039_03	2.13932	0.225161	1.7352	0.018059	1.80799	0.604749
PP_HC_HMP_S040_01	15.675	10.0763	13.5641	9.68957	12.5753	5.07783
PP_HC_HMP_S040_02	29.3604	37.9876	25.9805	38.4423	18.1175	13.3641
PP_HC_HMP_S041_01	1.04689	0.301616	0.73654	0.0879478	1.1332	0.644463
PP_HC_HMP_S042_02	0.496601	1.86788	0.207976	1.33627	0.817324	2.05628
PP_HC_HMP_S044_01	55.9519	0.0716532	50.0245	0.00566805	36.3346	0.221327
PP_HC_HMP_S044_02	23.4668	0.241143	22.1324	0.114316	15.1552	0.4824
PP_HC_HMP_S045_01	4.19159	0.224455	3.35624	0.0470804	3.63051	0.608759
PP_HC_HMP_S045_02	6.71705	23.339	5.80641	23.0789	4.79517	9.91869
PP_HC_HMP_S046_01	7.37693	2.51237	6.71285	2.20696	4.51055	2.03995
PP_HC_HMP_S047_01	11.5641	14.1875	11.1322	14.1222	6.67296	5.93484
PP_HC_HMP_S047_02	34.6951	69.9927	35.8486	68.8918	18.4023	29.2244
PP_HC_HMP_S048_01	6.46021	0.183293	5.23399	0.0192757	5.20123	0.546593
PP_HC_HMP_S048_02	24.4411	0.226773	21.4392	0.0209511	15.7779	0.542583
PP_HC_HMP_S049_01	20.3429	0.619225	18.0929	0.302111	14.6286	0.932078
PP_HC_HMP_S049_02	9.91976	0.530609	8.84907	0.0751382	6.91438	1.40403
PP_HC_HMP_S051_01	0.550938	7.7313	0.379511	6.96987	0.65827	5.31276
PP_HC_HMP_S051_02	2.39821	0.746304	1.99401	0.250329	1.8034	1.36312
PP_HC_HMP_S052_01	36.3122	3.03884	32.639	2.53134	26.412	2.60125
PP_HC_HMP_S055_01	4.27747	0.253435	3.78542	0.04653	2.83249	0.552997
PP_HC_HMP_S056_01	5.19355	30.3271	4.51292	29.31	3.45275	13.3637
PP_HC_HMP_S057_01	16.666	41.6202	16.1478	42.2285	9.971	17.9044
PP_HC_HMP_S057_02	3.69027	89.2026	3.31472	92.7096	2.6528	29.3778
PP_HC_HMP_S057_03	0.356962	44.8729	0.158366	44.7651	0.579563	19.266
PP_HC_HMP_S059_02	12.7953	56.3572	11.9219	57.4846	6.62935	19.0825
PP_HC_HMP_S061_01	1.49422	0.113388	1.21289	0.0125966	1.438	0.288177
PP_HC_HMP_S061_02	2.67589	0.195656	2.31369	0.0214578	2.01914	0.524123
PP_HC_HMP_S062_01	32.4395	131.996	30.0749	135.483	22.2656	54.7982
PP_HC_HMP_S062_02	9.81821	108.065	9.09773	111.734	6.59639	41.8487
PP_HC_HMP_S063_01	9.10829	6.96169	8.35853	5.72003	5.91133	5.72892
PP_HC_HMP_S063_02	6.25412	4.51365	5.60064	3.67142	3.82189	3.86195
PP_HC_HMP_S064_01	9.619	58.0071	8.12359	56.5114	7.62888	24.9402
PP_HC_HMP_S064_02	11.6499	2.68804	6.87766	0.578382	15.8807	4.81025
PP_HC_HMP_S066_01	12.0136	0.157316	10.7163	0.02368	8.58527	0.412293
PP_HC_HMP_S066_02	1.04885	1.9084	0.719397	1.37152	1.22135	2.20099
PP_HC_HMP_S066_03	13.5154	19.9598	11.9953	18.4553	9.70106	11.9841
PP_HC_HMP_S067_01	15.8513	17.6244	14.526	16.8851	10.9726	9.63483
PP_HC_HMP_S067_02	1.33812	0.676792	0.944317	0.230312	1.46421	1.19686
PP_HC_HMP_S067_03	12.9476	3.24923	11.5216	2.73314	8.9232	2.70577
PP_HC_HMP_S068_01	11.7506	20.3199	10.1415	18.2704	7.94077	12.8632
PP_HC_HMP_S068_02	27.2332	32.8536	23.4681	31.6025	20.1078	17.9051
PP_HC_HMP_S068_03	22.3983	0.18355	19.3115	0.0192096	17.4391	0.55494
PP_HC_HMP_S069_01	6.11641	8.93834	5.06975	6.30435	4.89887	9.90775
PP_HC_HMP_S069_02	4.90658	6.95003	3.97013	5.25906	4.14628	6.84334
PP_HC_HMP_S070_01	0.898535	0.127494	0.621898	0.00898653	0.988826	0.377915
PP_HC_HMP_S070_02	1.17997	0.134145	0.853133	0.0221903	1.29547	0.345888
PP_HC_HMP_S070_03	3.61282	0.164153	3.11061	0.0289366	3.05372	0.457244
PP_HC_HMP_S072_01	2.94059	34.635	2.51181	35.0254	2.56807	12.6193
PP_HC_HMP_S072_02	0.84878	84.8953	0.618262	87.8045	0.933692	31.8934
PP_HC_HMP_S073_01	25.4292	6.17149	22.2309	5.84973	16.7818	3.4912
PP_HC_HMP_S073_02	11.8525	0.223063	11.2449	0.0395012	6.23353	0.59845
PP_HC_HMP_S073_03	5.12634	6.60312	4.72202	6.10855	3.19709	4.23722
PP_HC_HMP_S074_01	47.3316	1.6007	45.7188	0.316475	27.1338	3.12003
PP_HC_HMP_S074_02	2.07829	0.0609325	1.70106	0.00721388	1.69557	0.212109
PP_HC_HMP_S074_03	14.3145	0.107106	13.2913	0.0181882	8.73755	0.314263
PP_HC_HMP_S076_01	7.97756	96.7942	7.08315	93.9888	5.92704	54.6455
PP_HC_HMP_S076_02	4.44094	53.6888	3.99631	52.4945	3.19348	22.9712
PP_HC_HMP_S077_01	23.1653	1.80713	22.3446	1.44396	11.4667	1.78262
PP_HC_HMP_S077_02	9.13001	24.9961	8.63828	24.9302	5.19155	9.50304
PP_HC_HMP_S077_03	10.6329	60.9658	9.74852	61.6979	6.65994	21.3615
PP_HC_HMP_S078_01	16.2469	50.0536	15.0566	50.9398	8.28543	17.9948
PP_HC_HMP_S078_02	3.18011	69.1352	2.69858	70.6792	2.3431	21.8861
PP_HC_HMP_S078_03	55.9817	122.111	52.5813	125.714	29.93	38.8519
PP_HC_HMP_S079_01	2.30934	0.167678	1.89289	0.0284099	1.78522	0.427358
PP_HC_HMP_S080_01	7.64472	1.39037	7.1926	1.09516	4.40973	1.43964
PP_HC_HMP_S081_01	3.04537	0.0265715	2.6469	0	2.2505	0.133995
PP_HC_HMP_S082_01	9.39373	0.164888	8.75249	0.0279817	5.67316	0.478934
PP_HC_HMP_S084_01	40.4902	0.560608	35.874	0.112795	26.9897	1.44053
PP_HC_HMP_S084_02	2.39485	0.452284	2.07057	0.0748234	1.81558	1.14153
PP_HC_HMP_S085_01	0.404161	1.51	0.22789	0.396957	0.547223	2.96669
PP_HC_HMP_S086_01	14.17	2.42998	13.067	0.457404	8.43614	6.0365
PP_HC_HMP_S087_01	13.7895	20.8936	12.6925	20.1308	8.05122	10.2166
PP_HC_HMP_S088_01	65.0045	11.8507	64.3457	10.9859	31.4555	6.82824
PP_HC_HMP_S091_01	2.58325	0.738984	2.18532	0.170641	1.93334	1.38387
PP_HC_HMP_S097_01	9.5457	0.854747	8.25516	0.343439	6.53477	1.65444
PP_HC_HMP_S098_01	2.70175	8.72022	2.17719	8.31116	2.17949	4.65668
PP_HC_HMP_S098_02	10.2596	15.4706	8.96699	15.3612	6.35044	6.53782
PP_HC_HMP_S098_03	2.67394	6.28401	2.23396	5.49265	2.27289	4.90416
PP_HC_HMP_S099_01	7.06955	4.13196	6.71162	3.61776	4.10303	3.22392
PP_HC_HMP_S100_01	20.4557	61.9297	18.5476	61.9643	11.9644	24.5441
PP_HC_HMP_S100_02	5.68799	102.915	5.24261	107.397	3.1937	33.4927
PP_HC_HMP_S101_01	12.8976	2.05445	11.3078	0.588804	10.3357	4.30642
PP_HC_HMP_S101_02	1.62557	1.56333	1.29103	0.364467	1.55537	3.38771
PP_HC_HMP_S102_01	1.0769	54.2021	0.702122	55.4134	1.32424	21.5797
PP_HC_HMP_S103_01	20.7334	142.766	19.838	148.761	11.9168	57.4574
PP_HC_HMP_S105_01	11.1086	1.67643	10.5829	1.17231	6.64256	1.8952
PP_HC_HMP_S105_02	53.8474	51.178	53.0511	51.3848	26.5063	17.406
PP_HC_HMP_S106_01	13.9897	48.3835	12.0926	47.8148	9.54164	19.3241
PP_HC_HMP_S107_01	14.8293	7.62425	14.0064	6.95751	9.84637	4.89173
PP_HC_HMP_S109_01	5.50724	0.238404	5.07012	0.0693162	3.3139	0.488691
PP_HC_HMP_S109_02	13.7882	0.529317	12.4974	0.102484	8.80326	1.22755
PP_HC_HMP_S110_01	7.54157	48.1115	6.86806	48.9861	4.81209	17.1024
PP_HC_HMP_S110_02	15.3845	314.283	14.4952	326.593	8.7239	95.186
PP_HC_HMP_S111_03	37.6352	5.29075	36.2852	4.57179	20.1913	4.12917
PP_HC_HMP_S112_01	1.9364	0.290167	1.42511	0.0206908	1.82129	0.704941
PP_HC_HMP_S112_02	5.52597	11.9629	4.7259	11.517	3.80755	5.78804
PP_HC_HMP_S113_02	94.0433	35.7329	87.7157	36.1003	51.0253	13.2285
PP_HC_HMP_S114_01	1.70544	1.25674	1.35509	0.339331	1.53997	2.56328
PP_HC_HMP_S114_02	22.1421	7.31914	20.1391	5.83501	12.8034	6.2875
PP_HC_HMP_S114_03	28.4496	21.0016	23.5657	20.8505	19.1337	8.53736
PP_HC_HMP_S115_01	9.19581	29.7652	8.41266	29.8177	5.49961	12.0096
PP_HC_HMP_S115_02	10.2237	2.58487	9.68211	2.00387	5.85008	2.56742
PP_HC_HMP_S115_03	20.1096	0.765786	18.9005	0.321695	11.0527	1.29107
PP_HC_HMP_S117_01	43.5897	2.33894	40.7906	0.486643	23.6795	5.16655
PP_HC_HMP_S117_02	32.6709	3.05408	28.7841	2.74595	20.7877	2.19615
PP_HC_HMP_S118_01	4.03187	62.1267	3.45601	63.7763	3.06485	20.2351
PP_HC_HMP_S118_02	67.8847	58.2123	66.321	58.9193	35.2707	19.7271
PP_HC_HMP_S119_02	22.9535	7.27607	22.0162	6.82012	10.5698	4.16445
PP_HC_HMP_S121_01	101.083	0.742462	97.1644	0.0927102	48.4734	1.60047
PP_HC_HMP_S121_02	74.4064	0.239915	66.0602	0.0337158	43.058	0.672739
PP_HC_HMP_S122_01	11.7302	19.8539	11.095	19.3786	7.03537	9.03642
PP_HC_HMP_S122_02	8.87677	33.4584	8.42351	33.5335	5.02959	13.2183
PP_HC_HMP_S123_01	5.62736	0.501881	4.62328	0.0861858	4.061	1.06043
PP_HC_HMP_S123_02	17.3794	55.1771	14.0734	56.4443	12.4128	19.1612
PP_HC_HMP_S123_03	2.27342	8.99122	1.98317	8.13515	1.73054	5.96486
PP_HC_HMP_S124_01	10.6985	1.27695	9.42508	0.283656	6.92588	2.87768
PP_HC_HMP_S124_02	2.76926	43.5387	2.24852	44.7209	2.31148	15.2553
PP_HC_HMP_S126_01	8.20078	11.0655	6.60397	10.0859	6.49409	6.3124
PP_HC_HMP_S127_01	8.05192	6.11617	6.9413	5.59352	5.44184	3.98355
PP_HC_HMP_S132_01	2.3438	7.41696	1.75063	4.06566	2.24271	10.7636
PP_HC_HMP_S138_01	88.8487	7.6722	78.8726	6.91139	54.2044	4.79231
PP_HC_HMP_S139_01	3.19767	28.388	2.53277	28.6106	2.67057	10.8372
PP_HC_HMP_S140_01	5.13815	0.378513	4.10783	0.0692112	4.15959	0.789958
PP_HC_HMP_S141_01	6.2248	0.141892	5.30668	0.0140112	4.38441	0.382641
PP_HC_HMP_S142_01	61.4577	1.2404	52.8817	0.297191	43.2068	2.45829
PP_HC_HMP_S143_01	66.7493	4.75604	64.4309	4.14527	30.0758	3.34003
PP_HC_HMP_S144_01	9.95811	0.0711753	9.53849	0.00151262	6.02639	0.271603
PP_HC_HMP_S148_01	23.7289	0.421915	22.1298	0.0776349	12.7691	0.828957
PP_HC_HMP_S149_01	41.3178	5.2756	35.4547	4.00135	31.196	5.29165
PP_HC_HMP_S150_01	23.8417	0.603384	23.02	0.0916585	12.4013	1.37926
PP_HC_HMP_S152_01	4.42776	2.19776	3.83766	1.84458	2.74272	1.93269
PP_HC_HMP_S152_02	54.6217	124.466	51.7383	129.19	26.0049	40.6152
PP_HC_HMP_S153_01	60.4579	57.6851	58.8023	58.7454	36.0137	22.2601
PP_HC_HMP_S154_01	12.6191	0.0369399	11.173	0	8.59847	0.142565
PP_HC_HMP_S157_01	56.6472	0.14358	49.599	0.015842	39.9676	0.392676
PP_HC_HMP_S158_01	3.74266	0.62979	3.12317	0.330208	3.01651	0.894702
PP_HC_HMP_S162_01	2.20497	3.01315	1.90028	2.62154	1.63017	2.28837
PP_HC_HMP_S164_01	72.1914	0.00540577	69.5818	0	42.4351	0.0272101
PT_HC_HMP_S024_01	7.63201	0.161726	3.87973	0.0270904	10.8377	0.390963
PT_HC_HMP_S024_02	23.4729	1.14852	13.3715	0.196765	31.2861	2.42248
PT_HC_HMP_S030_01	12.1879	1.19897	6.89877	0.232984	17.3206	2.59902
PT_HC_HMP_S142_01	4.04029	0.584131	1.91091	0.10107	6.26522	1.44667
PT_HC_HMP_S148_01	5.78535	0.761369	3.11351	0.207756	9.11132	1.53674
PT_HC_HMP_S159_01	22.474	0.468191	10.5551	0.127748	34.4785	1.01865
PT_HC_HMP_S162_01	20.6471	0.382064	12.3109	0.0662987	26.7759	0.90706
SA_HC_HMP_S024_01	1.82541	0.097357	1.26123	0.00764139	2.0242	0.322877
SA_HC_HMP_S024_02	1.4648	0.160293	0.832465	0.00865536	2.01592	0.490189
SA_HC_HMP_S028_01	0.687771	0.317001	0.174918	0.0328026	1.24175	0.733221
SA_HC_HMP_S028_02	3.91157	0.6547	2.11491	0.120272	5.55284	1.44691
SA_HC_HMP_S030_01	6.97178	0.723107	4.56669	0.116799	8.02376	1.58472
SA_HC_HMP_S142_01	0.511497	0.0569076	0.270282	0.00597086	0.785973	0.235988
SA_HC_HMP_S159_01	6.71002	1.16732	4.39756	0.29589	7.70549	2.35183
TD_HC_HMP_S001_01	20.5023	0.281387	12.6699	0.0294156	26.5033	0.697642
TD_HC_HMP_S001_02	25.6545	2.18441	6.07238	0.420766	48.7008	5.54258
TD_HC_HMP_S002_01	27.5048	1.86652	15.7759	0.406156	40.9511	4.23654
TD_HC_HMP_S002_02	29.9979	1.55407	17.5461	0.341478	43.1389	3.75619
TD_HC_HMP_S003_01	11.4388	1.16279	7.23241	0.386727	14.2733	2.21958
TD_HC_HMP_S003_02	41.8032	1.56117	23.6398	0.438399	56.3771	3.05135
TD_HC_HMP_S004_01	10.5009	0.310458	5.0478	0.0568528	15.9966	0.619632
TD_HC_HMP_S005_01	10.0017	0.0332864	5.43028	0	14.7151	0.198821
TD_HC_HMP_S005_02	16.2303	0.0812202	9.15983	0.00784742	23.2961	0.314644
TD_HC_HMP_S005_03	23.9304	0.0596922	12.7411	0	35.9724	0.323656
TD_HC_HMP_S006_01	25.4298	1.99834	13.4779	0.348796	35.8236	4.55301
TD_HC_HMP_S006_02	29.0992	0.701137	16.0878	0.197497	40.7003	1.55189
TD_HC_HMP_S006_03	33.8108	1.90964	15.7796	0.379898	54.5423	5.16516
TD_HC_HMP_S008_01	26.1819	0.889225	14.4103	0.184664	36.8411	2.21212
TD_HC_HMP_S011_01	19.2346	4.58544	10.7496	1.01412	28.3012	10.3336
TD_HC_HMP_S012_01	20.1807	2.48432	11.5774	0.620941	28.809	5.00349
TD_HC_HMP_S012_02	19.7218	2.38565	8.93332	0.523207	31.615	4.51075
TD_HC_HMP_S015_01	15.2774	3.22655	6.74039	0.703005	23.2736	9.47247
TD_HC_HMP_S015_02	15.1535	1.3598	8.34629	0.341911	21.2094	3.25433
TD_HC_HMP_S015_03	28.1632	3.18703	15.9834	0.679138	37.9798	7.75537
TD_HC_HMP_S016_01	17.7259	0.505519	11.7047	0.104887	21.9923	1.14221
TD_HC_HMP_S016_02	24.9559	2.17915	15.4471	0.401509	34.6131	4.05163
TD_HC_HMP_S017_01	15.9417	1.07651	5.81514	0.276437	27.8064	2.16437
TD_HC_HMP_S017_02	14.2998	0.453688	4.47025	0.0948995	26.0835	0.980485
TD_HC_HMP_S018_01	24.0333	1.49642	14.2101	0.238332	33.8608	2.82234
TD_HC_HMP_S018_02	18.3359	2.0463	9.87491	0.328692	28.6858	3.988
TD_HC_HMP_S019_01	8.88291	0.389309	4.70652	0.0512646	12.7446	0.848983
TD_HC_HMP_S019_02	15.5348	1.23543	8.74062	0.209739	22.1047	2.31069
TD_HC_HMP_S019_03	23.3055	1.24818	13.2072	0.164188	33.869	2.4901
TD_HC_HMP_S020_01	20.9913	1.76341	11.741	0.301552	32.259	3.41428
TD_HC_HMP_S020_02	56.2841	4.86502	30.156	1.09771	83.9423	10.8065
TD_HC_HMP_S022_01	32.131	1.297	20.5202	0.226088	40.1919	3.26809
TD_HC_HMP_S022_02	28.0011	2.73765	16.4656	0.570931	36.9141	6.03867
TD_HC_HMP_S022_03	13.8033	0.554873	7.9771	0.0823573	18.4042	1.52204
TD_HC_HMP_S023_01	10.6095	0.364976	4.66033	0.0670097	16.7832	0.949664
TD_HC_HMP_S023_02	35.593	0.253472	16.9197	0.0394177	57.1021	0.644206
TD_HC_HMP_S024_01	31.7398	2.17956	18.62	0.434118	43.6724	4.84218
TD_HC_HMP_S025_01	21.5616	0.399697	12.2281	0.0538382	30.5896	0.855594
TD_HC_HMP_S025_02	23.4975	1.80944	13.2612	0.226147	32.0899	3.42398
TD_HC_HMP_S027_01	32.3639	5.54132	17.1362	2.05234	51.8868	11.3344
TD_HC_HMP_S027_02	50.3344	5.74022	21.113	2.49222	89.5755	10.8779
TD_HC_HMP_S027_03	53.3942	20.4037	20.8733	14.0797	99.5081	31.4433
TD_HC_HMP_S028_01	31.7645	1.76232	18.3597	0.434174	42.0357	3.87825
TD_HC_HMP_S028_02	37.494	1.52892	21.0788	0.398059	52.8615	3.34958
TD_HC_HMP_S029_01	16.7539	1.05277	10.0744	0.186456	21.8235	2.3797
TD_HC_HMP_S029_02	13.0451	0.209113	7.88925	0.0258534	17.3697	0.539867
TD_HC_HMP_S030_01	64.656	5.94186	34.5307	1.05091	95.7256	11.9157
TD_HC_HMP_S030_02	14.7835	2.14683	7.82794	0.355667	21.7768	4.23345
TD_HC_HMP_S030_03	11.8764	1.70964	6.42197	0.299502	17.292	3.48306
TD_HC_HMP_S032_01	16.3548	0.48807	8.18612	0.0740744	24.5936	1.13594
TD_HC_HMP_S032_02	11.107	0.396263	5.74719	0.0733564	15.8505	1.05884
TD_HC_HMP_S033_01	20.938	1.45972	10.8705	0.268744	30.0071	2.95505
TD_HC_HMP_S034_01	19.7876	1.41655	11.0447	0.283623	27.5086	3.51564
TD_HC_HMP_S034_02	44.0069	1.93944	23.1954	0.391103	65.6607	4.44342
TD_HC_HMP_S034_03	41.6897	1.91433	22.0383	0.415282	63.7596	4.48361
TD_HC_HMP_S034_04	21.7152	0.971425	12.642	0.156138	29.9124	2.35612
TD_HC_HMP_S035_01	30.6561	0.764754	17.8833	0.173313	42.5729	1.78779
TD_HC_HMP_S036_01	33.1012	2.52818	18.8688	0.594826	44.4894	6.13757
TD_HC_HMP_S036_02	27.8679	1.00843	16.7371	0.270928	38.6983	2.29382
TD_HC_HMP_S037_01	34.1389	0.736339	20.3948	0.283312	45.0755	1.77717
TD_HC_HMP_S037_02	35.0468	0.527223	18.8474	0.220635	49.2172	1.06871
TD_HC_HMP_S037_03	48.262	0.781735	25.8628	0.397056	65.9851	1.3787
TD_HC_HMP_S038_01	11.2203	0.286464	4.79396	0.0466736	19.8733	0.589349
TD_HC_HMP_S038_02	10.4914	0.0673263	5.46309	0.000306974	17.1726	0.232907
TD_HC_HMP_S039_01	19.1903	2.02634	11.0973	0.447656	26.1319	4.85798
TD_HC_HMP_S039_02	21.9112	0.830669	12.6009	0.183305	29.4866	1.91465
TD_HC_HMP_S040_01	23.2064	0.298434	14.3375	0.0270575	29.9994	0.690005
TD_HC_HMP_S040_02	62.6202	0.539921	33.7013	0.0346581	86.5825	1.17902
TD_HC_HMP_S041_01	17.904	0.748449	8.50853	0.130997	26.2083	1.33647
TD_HC_HMP_S041_02	21.4163	1.41005	10.6534	0.27798	31.4743	2.859
TD_HC_HMP_S042_01	24.8426	2.43042	14.2954	0.534319	34.8872	5.26963
TD_HC_HMP_S042_02	26.6318	1.77048	14.2192	0.355789	40.1283	3.98424
TD_HC_HMP_S044_01	33.1878	2.32689	20.8329	0.544809	43.1387	5.54368
TD_HC_HMP_S044_02	11.4541	0.181566	5.34412	0.0255778	19.1208	0.500226
TD_HC_HMP_S045_01	25.7172	0.55403	14.0076	0.120448	37.6129	1.38386
TD_HC_HMP_S045_02	25.222	1.34064	13.6136	0.31891	37.5409	3.38647
TD_HC_HMP_S046_01	19.5484	0.812494	11.7849	0.165525	26.0528	1.71158
TD_HC_HMP_S046_02	25.403	0.739817	11.923	0.145523	40.3799	1.73944
TD_HC_HMP_S047_01	44.9703	0.918859	21.0263	0.257653	71.8403	1.92279
TD_HC_HMP_S047_02	35.133	0.534134	20.0286	0.0646959	49.5446	1.12645
TD_HC_HMP_S048_01	18.4724	0.303919	9.63072	0.0511974	28.1658	0.736527
TD_HC_HMP_S048_02	95.0971	1.56039	44.5928	0.273663	141.346	3.18474
TD_HC_HMP_S049_01	21.1382	2.61649	11.6296	0.623692	30.5087	5.74001
TD_HC_HMP_S049_02	13.195	4.12623	7.19791	0.86601	18.4872	8.72668
TD_HC_HMP_S051_01	27.6845	1.08439	17.9004	0.236794	35.3083	2.76739
TD_HC_HMP_S051_02	37.435	1.32893	21.5941	0.254069	50.0061	3.21108
TD_HC_HMP_S052_01	19.0481	0.555011	12.386	0.0968129	22.1573	1.14543
TD_HC_HMP_S055_01	32.0989	0.107462	13.2723	0.0166744	61.5925	0.257295
TD_HC_HMP_S055_02	32.2608	0.118936	13.9498	0.0162363	59.4235	0.317518
TD_HC_HMP_S055_03	26.5868	0.355926	11.5817	0.0652193	48.4117	0.861013
TD_HC_HMP_S055_04	21.9803	0.363317	8.79206	0.0690167	40.477	0.929825
TD_HC_HMP_S056_01	20.9329	1.48302	11.8558	0.384991	29.6857	3.56242
TD_HC_HMP_S057_01	12.9696	2.42175	6.60325	0.868627	19.0946	5.28754
TD_HC_HMP_S057_02	13.8289	0.917595	6.3259	0.370739	21.2063	1.86609
TD_HC_HMP_S057_03	13.6845	0.809871	4.77149	0.283129	24.7009	1.69924
TD_HC_HMP_S059_01	20.6461	0.525344	12.1175	0.0817178	29.0951	1.12851
TD_HC_HMP_S059_02	9.32033	0.639913	6.18573	0.184682	11.8936	1.17828
TD_HC_HMP_S060_01	16.7559	2.78318	7.99939	0.545044	26.0335	7.31216
TD_HC_HMP_S061_01	17.3813	0.507889	7.9627	0.0987603	28.0068	1.10514
TD_HC_HMP_S062_01	17.3022	1.02667	8.86906	0.22188	25.1329	2.14373
TD_HC_HMP_S062_02	11.5262	0.998202	5.52115	0.165225	16.2923	2.01374
TD_HC_HMP_S063_01	7.27179	1.34697	3.70578	0.340327	11.0559	2.51322
TD_HC_HMP_S063_02	14.0362	1.20491	6.29372	0.319248	22.1334	2.22496
TD_HC_HMP_S064_01	24.9788	5.2187	13.4858	1.2353	37.3914	9.45926
TD_HC_HMP_S064_02	13.7603	45.6898	12.4219	41.7922	7.99602	25.9999
TD_HC_HMP_S066_01	10.3771	1.18253	4.3779	0.304104	16.8883	2.2505
TD_HC_HMP_S066_02	19.0157	2.73203	11.4547	0.708094	25.4833	4.92465
TD_HC_HMP_S066_03	4.19723	4.17961	1.64384	1.21483	7.03581	7.51421
TD_HC_HMP_S067_01	9.84065	0.877075	6.86124	0.188559	10.9678	1.81283
TD_HC_HMP_S067_02	6.03436	0.840487	4.31068	0.167964	7.06358	1.92372
TD_HC_HMP_S067_03	32.4618	2.94047	18.3164	0.715384	43.9427	6.9172
TD_HC_HMP_S068_01	9.59478	0.51304	6.13154	0.0651288	12.2662	1.03465
TD_HC_HMP_S068_02	18.0418	0.953159	10.7844	0.085251	24.3805	1.92887
TD_HC_HMP_S068_03	24.5032	0.379985	11.9324	0.0380647	36.477	0.918288
TD_HC_HMP_S070_01	21.116	1.70258	11.9696	0.464192	28.9185	3.49426
TD_HC_HMP_S070_02	15.3459	1.13275	9.79789	0.163399	20.3082	2.57502
TD_HC_HMP_S070_03	23.6426	3.57917	14.9421	1.47989	31.1582	6.52602
TD_HC_HMP_S072_01	31.0115	1.3928	15.9155	0.330327	48.9513	2.95748
TD_HC_HMP_S072_02	17.4943	2.62606	8.756	1.75128	28.1197	3.07267
TD_HC_HMP_S073_01	35.7272	0.752132	23.9858	0.173187	44.0665	1.97752
TD_HC_HMP_S073_02	14.1319	0.312149	7.80469	0.0439534	19.8699	0.760411
TD_HC_HMP_S073_03	8.27513	0.148669	3.72882	0.0150501	12.7721	0.361595
TD_HC_HMP_S074_01	22.9517	1.02882	14.8924	0.230986	29.2141	2.31192
TD_HC_HMP_S074_02	15.5979	0.480652	9.93147	0.0878224	20.7229	1.1442
TD_HC_HMP_S074_03	16.1445	0.574765	8.40459	0.109265	24.0261	1.35545
TD_HC_HMP_S075_01	32.8798	0.593651	17.6902	0.153817	47.9097	1.3502
TD_HC_HMP_S076_01	37.5551	2.59502	22.2054	0.506109	53.349	6.17231
TD_HC_HMP_S076_02	28.0612	1.8771	15.9137	0.362531	40.6745	4.37635
TD_HC_HMP_S077_01	37.7341	2.6813	22.922	0.720845	49.0442	6.25725
TD_HC_HMP_S077_02	29.3428	1.60381	17.2072	0.375078	39.6456	3.62228
TD_HC_HMP_S078_01	22.4486	4.75991	14.4675	2.74089	27.4284	8.35717
TD_HC_HMP_S078_02	34.2104	6.12139	19.3079	1.44013	45.9228	15.155
TD_HC_HMP_S078_03	24.1541	4.47412	15.3649	1.05301	29.0103	9.88886
TD_HC_HMP_S079_01	63.0594	0.267757	31.6672	0.0257269	96.041	0.814201
TD_HC_HMP_S079_02	15.5678	0.227382	7.3381	0.00584347	24.2809	0.540975
TD_HC_HMP_S080_01	23.5863	0.688396	13.4068	0.156482	32.8971	1.58562
TD_HC_HMP_S081_01	16.2031	3.03675	9.47154	1.93595	21.7164	4.69344
TD_HC_HMP_S081_02	9.73751	0.511959	4.79421	0.0735003	14.7709	1.10101
TD_HC_HMP_S081_03	11.0007	0.672865	4.38251	0.265925	19.0901	1.31928
TD_HC_HMP_S082_01	12.816	0.830772	7.47563	0.173253	17.336	1.71499
TD_HC_HMP_S084_01	25.3744	1.79894	15.5844	0.441091	32.6067	4.11883
TD_HC_HMP_S085_01	38.8413	0.154537	20.0584	0.0090338	55.4106	0.470623
TD_HC_HMP_S086_01	29.1496	0.925407	17.6264	0.21198	38.659	2.1224
TD_HC_HMP_S087_01	34.3884	1.28914	21.7597	0.24102	43.548	2.54661
TD_HC_HMP_S088_01	21.0382	3.15443	12.3355	1.9569	28.2936	4.11738
TD_HC_HMP_S089_01	16.6904	2.68984	8.84435	1.16353	23.2844	4.42879
TD_HC_HMP_S090_01	16.9751	1.96633	7.3449	0.562378	26.4171	3.95057
TD_HC_HMP_S091_01	46.2613	0.610778	26.1887	0.129726	62.6988	1.35853
TD_HC_HMP_S095_01	6.54604	0.620863	3.14159	0.125361	9.86886	1.35481
TD_HC_HMP_S096_01	37.2669	4.47797	19.3621	1.32982	54.881	10.1751
TD_HC_HMP_S097_01	39.9869	2.3244	19.4358	0.833255	60.7999	5.45679
TD_HC_HMP_S098_01	37.3989	5.63499	19.926	1.29636	56.6884	13.5999
TD_HC_HMP_S098_02	29.2978	1.57464	16.6713	0.30674	44.1604	3.90265
TD_HC_HMP_S098_03	31.182	2.71144	15.4732	0.652605	50.9537	6.09762
TD_HC_HMP_S100_01	6.53184	0.804222	2.7081	0.161964	10.4157	1.48773
TD_HC_HMP_S100_02	6.17475	1.54718	2.9654	0.212831	9.43289	2.78774
TD_HC_HMP_S101_01	3.64501	0.222392	2.30143	0.0350611	4.41814	0.477237
TD_HC_HMP_S101_02	1.28058	0.279394	0.624796	0.0656188	1.94115	0.606725
TD_HC_HMP_S105_01	43.4884	1.94585	27.3314	0.409027	56.2956	4.49768
TD_HC_HMP_S105_02	33.3938	1.46277	22.1713	0.262261	39.9962	3.25257
TD_HC_HMP_S106_01	35.5244	0.442603	21.9073	0.071325	47.1356	0.97339
TD_HC_HMP_S107_01	16.1117	0.809245	9.9577	0.114359	20.9494	1.70688
TD_HC_HMP_S109_01	22.4673	2.09272	13.7576	0.514866	30.1758	5.2194
TD_HC_HMP_S109_02	66.542	2.97188	42.247	0.764615	84.6565	6.67161
TD_HC_HMP_S110_01	16.6005	1.30629	8.97732	0.242189	23.0146	3.25068
TD_HC_HMP_S111_01	41.138	0.293645	22.2302	0.0609654	60.1897	0.781425
TD_HC_HMP_S111_02	51.5391	0.457988	26.243	0.0773964	80.0729	1.01512
TD_HC_HMP_S111_03	22.9385	0.374531	12.6853	0.0932787	33.1891	1.03534
TD_HC_HMP_S112_01	17.8248	2.36906	10.0441	0.465846	23.6172	5.52557
TD_HC_HMP_S113_01	33.0163	0.879354	19.1352	0.206874	46.1616	2.03364
TD_HC_HMP_S113_02	32.2598	3.41733	19.7093	0.645193	42.6019	7.61992
TD_HC_HMP_S113_03	21.8081	0.955671	13.3955	0.138523	29.5465	2.27716
TD_HC_HMP_S114_01	29.9495	2.87543	16.2963	0.70585	42.2517	6.66433
TD_HC_HMP_S114_02	38.1378	5.59305	20.1325	2.01258	56.2296	11.8879
TD_HC_HMP_S114_03	21.1561	0.771351	8.64183	0.129452	34.929	1.81475
TD_HC_HMP_S115_01	5.83461	0.35492	2.9348	0.0616089	8.87571	0.796777
TD_HC_HMP_S115_02	12.1577	0.525708	6.40224	0.105305	18.3573	1.07495
TD_HC_HMP_S115_03	25.531	1.04304	14.9687	0.222244	34.0189	2.63664
TD_HC_HMP_S117_01	18.9547	1.67137	10.6008	0.361505	27.74	3.99322
TD_HC_HMP_S117_02	8.05641	0.40546	4.04331	0.0662068	12.1514	0.920647
TD_HC_HMP_S118_01	43.063	2.7355	25.5887	0.562421	58.6117	6.20822
TD_HC_HMP_S118_02	32.4708	1.07715	18.4961	0.191294	47.8521	2.40234
TD_HC_HMP_S119_01	8.87075	0.107685	4.38298	0.0217177	13.1933	0.256495
TD_HC_HMP_S119_02	18.6414	0.673427	8.74267	0.187613	28.7756	1.44164
TD_HC_HMP_S121_01	39.2541	0.497979	21.535	0.080603	55.0498	1.04449
TD_HC_HMP_S121_02	18.252	0.155049	10.1036	0.0192529	25.4076	0.465238
TD_HC_HMP_S121_03	68.7913	1.0476	39.0649	0.222533	94.0125	2.4896
TD_HC_HMP_S122_01	34.3885	0.95278	19.9949	0.238859	45.7967	2.14155
TD_HC_HMP_S122_02	48.1226	2.02225	31.506	0.371787	57.6855	5.00494
TD_HC_HMP_S123_01	43.266	1.37496	19.4286	0.199819	72.7694	2.91415
TD_HC_HMP_S123_02	63.2606	5.32726	29.2398	0.979164	102.375	11.7249
TD_HC_HMP_S124_01	30.9872	7.20651	15.9311	1.51517	44.4386	16.8801
TD_HC_HMP_S124_02	34.2757	4.62752	19.2325	0.988783	50.0399	10.5701
TD_HC_HMP_S127_01	27.5173	3.47549	12.3978	0.778666	43.4003	6.45394
TD_HC_HMP_S131_01	16.1418	0.566779	8.60188	0.0428892	23.5488	1.29163
TD_HC_HMP_S135_01	13.4042	1.26752	5.48554	0.338249	22.8463	3.24981
TD_HC_HMP_S137_01	18.672	0.470594	11.0912	0.0456961	25.3954	0.974768
TD_HC_HMP_S138_01	43.5492	2.05048	23.6903	0.345151	59.4191	5.00225
TD_HC_HMP_S140_01	17.801	1.05163	8.55606	0.184607	28.2206	2.78822
TD_HC_HMP_S141_01	4.06267	0.206247	1.26042	0.0681113	7.17345	0.394309
TD_HC_HMP_S142_01	20.9858	1.98515	11.1157	0.421981	30.8649	4.44299
TD_HC_HMP_S144_01	12.5263	0.0648234	3.77106	0.00607046	25.9199	0.164641
TD_HC_HMP_S145_01	19.8166	4.68529	12.3249	3.26352	25.0829	6.27615
TD_HC_HMP_S146_01	20.8487	1.25791	9.93362	0.20977	30.5356	2.50616
TD_HC_HMP_S146_02	38.6865	2.65534	18.2958	0.426151	56.8644	5.1926
TD_HC_HMP_S147_01	50.5931	0.407124	22.7558	0.0526679	80.3299	0.835993
TD_HC_HMP_S148_01	26.5705	1.88394	12.7674	0.312395	42.121	5.02571
TD_HC_HMP_S150_01	56.644	2.36051	29.1025	0.525885	83.8109	5.72889
TD_HC_HMP_S150_02	13.0144	0.439724	5.48952	0.0695956	20.7614	0.933781
TD_HC_HMP_S151_01	35.9019	1.04928	16.4062	0.219064	55.8289	2.40802
TD_HC_HMP_S152_01	45.7191	2.69484	21.6277	0.502293	70.6171	5.84352
TD_HC_HMP_S153_01	47.8397	1.7835	23.8066	0.304087	77.9593	3.86913
TD_HC_HMP_S155_01	61.351	1.92403	32.0846	0.393277	88.8228	4.04461
TD_HC_HMP_S157_01	28.6849	5.05531	14.4831	1.11749	39.0961	13.2533
TD_HC_HMP_S158_01	23.4559	0.811713	15.3459	0.145686	28.9782	1.93265
TD_HC_HMP_S159_01	12.6924	0.680741	5.11432	0.145178	20.9768	1.66336
TD_HC_HMP_S164_01	68.6903	0.814721	32.3046	0.135347	110.807	1.74231
TH_HC_HMP_S024_01	6.71409	0.335459	3.4841	0.0749969	9.67875	0.768693
TH_HC_HMP_S024_02	15.3673	1.08056	8.40373	0.249515	22.1375	2.62016
TH_HC_HMP_S030_01	12.3229	0.730104	6.53282	0.10966	18.0204	1.47107
TH_HC_HMP_S030_02	15.2012	1.19536	8.371	0.211576	21.6583	2.46712
TH_HC_HMP_S117_01	13.0902	3.33456	7.4005	0.787033	18.069	7.19877
