# Supplementary material for: Accurate and complete genomes from metagenomes
Source: Genome Res. 2020 Mar;30(3):315–33. doi: 10.1101/gr.258640.119 (PMC7111523; doi:10.1101/gr.258640.119)
Supplement: Supplemental Material [file supp_gr.258640.119_Supplemental_Table_S6.xlsx]

## Sheet: Table S6
Table S6. General information of bacterial genomes without GC skew detected.
Genome	NCBI accession number	Genome size (bp)	Taxonomic information
Acidobacterium capsulatum ATCC 51196	NC_012483.1	4127356	Bacteria; Acidobacteria; Acidobacteriales; Acidobacteriaceae; Acidobacterium
Candidatus Koribacter versatilis Ellin345	NC_008009.1	5650368	Bacteria; Acidobacteria; Acidobacteriales; Acidobacteriaceae; Candidatus Koribacter
Candidatus Solibacter usitatus Ellin6076	NC_008536.1	9965640	Bacteria; Acidobacteria; Solibacteres; Solibacterales; Solibacteraceae; Candidatus Solibacter
Actinomyces oris strain T14V	NZ_CP014232.1	3042917	Bacteria; Actinobacteria; Actinomycetales; Actinomycetaceae; Actinomyces
Actinomyces sp. oral taxon 414 strain F0588	NZ_CP012590.1	3836419	Bacteria; Actinobacteria; Actinomycetales; Actinomycetaceae; Actinomyces
Actinomyces sp. VUL4_3	NZ_CP017812.1	2207832	Bacteria; Actinobacteria; Actinomycetales; Actinomycetaceae; Actinomyces
Bifidobacterium adolescentis strain 22L	NZ_CP007443.1	2203222	Bacteria; Actinobacteria; Bifidobacteriales; Bifidobacteriaceae; Bifidobacterium
Bifidobacterium adolescentis strain BBMN23	NZ_CP010437.1	2173720	Bacteria; Actinobacteria; Bifidobacteriales; Bifidobacteriaceae; Bifidobacterium
Bifidobacterium longum 105-A	NZ_AP014658.1	2290145	Bacteria; Actinobacteria; Bifidobacteriales; Bifidobacteriaceae; Bifidobacterium
Bifidobacterium longum DJO10A	NC_010816.1	2375792	Bacteria; Actinobacteria; Bifidobacteriales; Bifidobacteriaceae; Bifidobacterium
Bifidobacterium longum NCC2705	NC_004307.2	2256640	Bacteria; Actinobacteria; Bifidobacteriales; Bifidobacteriaceae; Bifidobacterium
Bifidobacterium longum strain 35624	NZ_CP013673.1	2264056	Bacteria; Actinobacteria; Bifidobacteriales; Bifidobacteriaceae; Bifidobacterium
Bifidobacterium longum strain BG7	NZ_CP010453.1	2453124	Bacteria; Actinobacteria; Bifidobacteriales; Bifidobacteriaceae; Bifidobacterium
Bifidobacterium longum subsp. infantis 157F DNA	NC_015052.1	2400312	Bacteria; Actinobacteria; Bifidobacteriales; Bifidobacteriaceae; Bifidobacterium
Bifidobacterium longum subsp. infantis ATCC 15697	NC_011593.1	2832748	Bacteria; Actinobacteria; Bifidobacteriales; Bifidobacteriaceae; Bifidobacterium
Bifidobacterium longum subsp. longum BBMN68	NC_014656.1	2265943	Bacteria; Actinobacteria; Bifidobacteriales; Bifidobacteriaceae; Bifidobacterium
Bifidobacterium longum subsp. longum GT15	NZ_CP006741.1	2337521	Bacteria; Actinobacteria; Bifidobacteriales; Bifidobacteriaceae; Bifidobacterium
Bifidobacterium longum subsp. longum JCM 1217 DNA	NC_015067.1	2385164	Bacteria; Actinobacteria; Bifidobacteriales; Bifidobacteriaceae; Bifidobacterium
Bifidobacterium longum subsp. longum JDM301	NC_014169.1	2477838	Bacteria; Actinobacteria; Bifidobacteriales; Bifidobacteriaceae; Bifidobacterium
Bifidobacterium longum subsp. longum KACC 91563	NC_017221.1	2385301	Bacteria; Actinobacteria; Bifidobacteriales; Bifidobacteriaceae; Bifidobacterium
Bifidobacterium longum subsp. longum strain AH1206	NZ_CP016019.1	2421287	Bacteria; Actinobacteria; Bifidobacteriales; Bifidobacteriaceae; Bifidobacterium
Bifidobacterium longum subsp. longum strain CCUG30698	NZ_CP011965.1	2458004	Bacteria; Actinobacteria; Bifidobacteriales; Bifidobacteriaceae; Bifidobacterium
Bifidobacterium longum subsp. longum strain NCIMB8809	NZ_CP011964.1	2340989	Bacteria; Actinobacteria; Bifidobacteriales; Bifidobacteriaceae; Bifidobacterium
Catenulispora acidiphila DSM 44928	NC_013131.1	10467782	Bacteria; Actinobacteria; Catenulisporales; Catenulisporaceae; Catenulispora
Olsenella sp. Marseille-P2300	NZ_LT635455.1	2176737	Bacteria; Actinobacteria; Coriobacteriia; Coriobacteriales; Atopobiaceae; Olsenella
Olsenella uli DSM 7084	NC_014363.1	2051896	Bacteria; Actinobacteria; Coriobacteriia; Coriobacteriales; Atopobiaceae; Olsenella
Corynebacterium frankenforstense DSM 45800	NZ_CP009247.1	2604152	Bacteria; Actinobacteria; Corynebacteriales; Corynebacteriaceae; Corynebacterium
Corynebacterium humireducens NBRC 106098 = DSM 45392	NZ_CP005286.1	2681312	Bacteria; Actinobacteria; Corynebacteriales; Corynebacteriaceae; Corynebacterium
Corynebacterium maris DSM 45190	NC_021915.1	2787574	Bacteria; Actinobacteria; Corynebacteriales; Corynebacteriaceae; Corynebacterium
Corynebacterium sphenisci DSM 44792	NZ_CP009248.1	2594799	Bacteria; Actinobacteria; Corynebacteriales; Corynebacteriaceae; Corynebacterium
Rhodococcus sp. 2G	NZ_CP018063.1	5231430	Bacteria; Actinobacteria; Corynebacteriales; Nocardiaceae; Rhodococcus
Rhodococcus sp. p52	NZ_CP016819.1	4893347	Bacteria; Actinobacteria; Corynebacteriales; Nocardiaceae; Rhodococcus
Stackebrandtia nassauensis DSM 44728	NC_013947.1	6841557	Bacteria; Actinobacteria; Glycomycetales; Glycomycetaceae; Stackebrandtia
Brachybacterium faecium DSM 4810 chromosome	NC_013172.1	3614992	Bacteria; Actinobacteria; Micrococcales; Dermabacteraceae; Brachybacterium
Brachybacterium sp. P6-10-X1 strain P6-10-X1	NZ_CP017297.1	4385603	Bacteria; Actinobacteria; Micrococcales; Dermabacteraceae; Brachybacterium
Intrasporangium calvum DSM 43043	NC_014830.1	4024382	Bacteria; Actinobacteria; Micrococcales; Intrasporangiaceae; Intrasporangium
Janibacter terrae strain YFY001	NZ_CP013290.1	3401189	Bacteria; Actinobacteria; Micrococcales; Intrasporangiaceae; Janibacter
Jonesia denitrificans DSM 20603	NC_013174.1	2749646	Bacteria; Actinobacteria; Micrococcales; Jonesiaceae; Jonesia
Agromyces sp. AR33	NZ_CP013979.1	4373124	Bacteria; Actinobacteria; Micrococcales; Microbacteriaceae; Agromyces
Clavibacter michiganensis subsp. michiganensis NCPPB 382	NC_009480.1	3297891	Bacteria; Actinobacteria; Micrococcales; Microbacteriaceae; Clavibacter
Clavibacter michiganensis subsp. nebraskensis NCPPB 2581	NC_020891.1	3063596	Bacteria; Actinobacteria; Micrococcales; Microbacteriaceae; Clavibacter
Clavibacter michiganensis subsp. Sepedonicus	NC_010407.1	3258645	Bacteria; Actinobacteria; Micrococcales; Microbacteriaceae; Clavibacter
Cnuibacter physcomitrellae strain XA(T)	NZ_CP020715.1	4061502	Bacteria; Actinobacteria; Micrococcales; Microbacteriaceae; Cnuibacter
Curtobacterium pusillum strain AA3	NZ_CP018783.1	3973750	Bacteria; Actinobacteria; Micrococcales; Microbacteriaceae; Curtobacterium
Curtobacterium sp. BH-2-1-1	NZ_CP017580.1	3795948	Bacteria; Actinobacteria; Micrococcales; Microbacteriaceae; Curtobacterium
Curtobacterium sp. MR_MD2014	NZ_CP009755.1	3443800	Bacteria; Actinobacteria; Micrococcales; Microbacteriaceae; Curtobacterium
Frondihabitans sp. PAMC28766	NZ_CP014513.1	4345897	Bacteria; Actinobacteria; Micrococcales; Microbacteriaceae; Frondihabitans
Leifsonia xyli strain SE134	NZ_CP014761.1	3596761	Bacteria; Actinobacteria; Micrococcales; Microbacteriaceae; Leifsonia
Leifsonia xyli subsp. cynodontis DSM 46306	NC_022438.1	2686418	Bacteria; Actinobacteria; Micrococcales; Microbacteriaceae; Leifsonia
Microbacterium aurum strain KACC 15219	NZ_CP018762.1	3424892	Bacteria; Actinobacteria; Micrococcales; Microbacteriaceae; Microbacterium
Microbacterium testaceum StLB037 DNA	NC_015125.1	3982034	Bacteria; Actinobacteria; Micrococcales; Microbacteriaceae; Microbacterium
Microbacterium chocolatum strain SIT 101	NZ_CP015810.1	3117902	Bacteria; Actinobacteria; Micrococcales; Microbacteriaceae; Microterricola
Microterricola viridarii strain ERGS5:02	NZ_CP014145.1	3689726	Bacteria; Actinobacteria; Micrococcales; Microbacteriaceae; Microterricola
Rathayibacter tritici strain NCPPB 1953	NZ_CP015515.1	3354681	Bacteria; Actinobacteria; Micrococcales; Microbacteriaceae; Rathayibacter
Arthrobacter sp. ERGS1:01 isolate water	NZ_CP012479.1	4030317	Bacteria; Actinobacteria; Micrococcales; Micrococcaceae; Arthrobacter
Arthrobacter sp. U41	NZ_CP015732.1	4386369	Bacteria; Actinobacteria; Micrococcales; Micrococcaceae; Arthrobacter
Kocuria flava strain HO-9041	NZ_CP013254.1	3504335	Bacteria; Actinobacteria; Micrococcales; Micrococcaceae; Kocuria
Micrococcus luteus NCTC 2665	NC_012803.1	2501097	Bacteria; Actinobacteria; Micrococcales; Micrococcaceae; Micrococcus
Pseudarthrobacter chlorophenolicus A6	NC_011886.1	4395537	Bacteria; Actinobacteria; Micrococcales; Micrococcaceae; Pseudarthrobacter
Pseudarthrobacter phenanthrenivorans Sphe3	NC_015145.1	4250414	Bacteria; Actinobacteria; Micrococcales; Micrococcaceae; Pseudarthrobacter
Rothia mucilaginosa DY-18 DNA	NC_013715.1	2264603	Bacteria; Actinobacteria; Micrococcales; Micrococcaceae; Rothia
Rothia mucilaginosa strain NUM-Rm6536	NZ_AP014938.1	2292716	Bacteria; Actinobacteria; Micrococcales; Micrococcaceae; Rothia
Sinomonas atrocyanea strain KCTC 3377	NZ_CP014518.1	4410241	Bacteria; Actinobacteria; Micrococcales; Micrococcaceae; Sinomonas
Isoptericola dokdonensis DS-3	NZ_CP014209.1	3826972	Bacteria; Actinobacteria; Micrococcales; Promicromonosporaceae; Isoptericola
Isoptericola variabilis 225	NC_015588.1	3307740	Bacteria; Actinobacteria; Micrococcales; Promicromonosporaceae; Isoptericola
Xylanimonas cellulosilytica DSM 15894	NC_013530.1	3742776	Bacteria; Actinobacteria; Micrococcales; Promicromonosporaceae; Xylanimonas
Sanguibacter keddieii DSM 10542	NC_013521.1	4253413	Bacteria; Actinobacteria; Micrococcales; Sanguibacteraceae; Sanguibacter
Tropheryma whipplei str. Twist	NC_004572.3	927303	Bacteria; Actinobacteria; Micrococcales; Tropheryma
Micromonospora sp. L5	NC_014815.1	6962533	Bacteria; Actinobacteria; Micromonosporales; Micromonosporaceae; Micromonospora
Aeromicrobium erythreum strain AR18	NZ_CP011502.1	3629239	Bacteria; Actinobacteria; Propionibacteriales; Nocardioidaceae; Aeromicrobium
Nocardioides dokdonensis FR1436	NZ_CP015079.1	4376707	Bacteria; Actinobacteria; Propionibacteriales; Nocardioidaceae; Nocardioides
Pimelobacter simplex VKM Ac-2033D	NZ_CP009896.1	5637360	Bacteria; Actinobacteria; Propionibacteriales; Nocardioidaceae; Pimelobacter
Tessaracoccus flavescens strain SST-39T	NZ_CP019607.1	3603805	Bacteria; Actinobacteria; Propionibacteriales; Propionibacteriaceae; Tessaracoccus
Tessaracoccus sp. NSG39	NZ_CP019606.1	3934699	Bacteria; Actinobacteria; Propionibacteriales; Propionibacteriaceae; Tessaracoccus
Tessaracoccus sp. T2.5-30	NZ_CP019229.1	3212699	Bacteria; Actinobacteria; Propionibacteriales; Propionibacteriaceae; Tessaracoccus
Alloactinosynnema sp. L-07	NZ_LN850107.1	7405112	Bacteria; Actinobacteria; Pseudonocardiales; Pseudonocardiaceae
Pseudonocardia sp. AL041005-10	NZ_CP011862.1	6143341	Bacteria; Actinobacteria; Pseudonocardiales; Pseudonocardiaceae; Pseudonocardia
Pseudonocardia sp. HH130629-09	NZ_CP011868.1	6058802	Bacteria; Actinobacteria; Pseudonocardiales; Pseudonocardiaceae; Pseudonocardia
Streptomyces albus strain BK3-25	NZ_CP016825.1	8308430	Bacteria; Actinobacteria; Streptomycetales; Streptomycetaceae; Streptomyces
Streptomyces autolyticus strain CGMCC0516	NZ_CP019458.1	10029028	Bacteria; Actinobacteria; Streptomycetales; Streptomycetaceae; Streptomyces
Streptomyces avermitilis MA-4680 = NBRC 14893 DNA	NC_003155.5	9025608	Bacteria; Actinobacteria; Streptomycetales; Streptomycetaceae; Streptomyces
Streptomyces griseochromogenes strain ATCC 14511	NZ_CP016279.1	10764674	Bacteria; Actinobacteria; Streptomycetales; Streptomycetaceae; Streptomyces
Streptomyces hygroscopicus strain XM201	NZ_CP018627.1	12012215	Bacteria; Actinobacteria; Streptomycetales; Streptomycetaceae; Streptomyces
Streptomyces hygroscopicus subsp. limoneus strain KCTC 1717 chromosome II	NZ_CP013220.1	1889906	Bacteria; Actinobacteria; Streptomycetales; Streptomycetaceae; Streptomyces
Streptomyces silaceus strain ACCC40021	NZ_CP015588.1	8625867	Bacteria; Actinobacteria; Streptomycetales; Streptomycetaceae; Streptomyces
Streptomyces sp. RTd22	NZ_CP015726.1	11142275	Bacteria; Actinobacteria; Streptomycetales; Streptomycetaceae; Streptomyces
Streptomyces violaceusniger Tu 4113	NC_015957.1	10657107	Bacteria; Actinobacteria; Streptomycetales; Streptomycetaceae; Streptomyces
Nocardiopsis alba ATCC BAA-2165	NC_018524.1	5848211	Bacteria; Actinobacteria; Streptosporangiales; Nocardiopsaceae; Nocardiopsis
Nocardiopsis dassonvillei subsp. dassonvillei DSM 43111 chromosome 1	NC_014210.1	5767958	Bacteria; Actinobacteria; Streptosporangiales; Nocardiopsaceae; Nocardiopsis
Nocardiopsis dassonvillei subsp. dassonvillei DSM 43111 chromosome 2	NC_014211.1	775354	Bacteria; Actinobacteria; Streptosporangiales; Nocardiopsaceae; Nocardiopsis
Thermobifida fusca YX	NC_007333.1	3642249	Bacteria; Actinobacteria; Streptosporangiales; Nocardiopsaceae; Thermobifida
Nonomuraea sp. ATCC 55076	NZ_CP017717.1	13047416	Bacteria; Actinobacteria; Streptosporangiales; Streptosporangiaceae; Nonomuraea
Thermomonospora curvata DSM 43183	NC_013510.1	5639016	Bacteria; Actinobacteria; Streptosporangiales; Thermomonosporaceae; Thermomonospora
Aquifex aeolicus VF5	NC_000918.1	1551335	Bacteria; Aquificae; Aquificales; Aquificaceae; Aquifex
Hydrogenobacter thermophilus TK-6	NC_013799.1	1743135	Bacteria; Aquificae; Aquificales; Aquificaceae; Hydrogenobacter
Hydrogenobacter thermophilus TK-6	NC_017161.1	1742932	Bacteria; Aquificae; Aquificales; Aquificaceae; Hydrogenobacter
Hydrogenobaculum sp. 3684	NC_015557.1	1552775	Bacteria; Aquificae; Aquificales; Aquificaceae; Hydrogenobaculum
Hydrogenobaculum sp. HO	NC_020411.1	1552931	Bacteria; Aquificae; Aquificales; Aquificaceae; Hydrogenobaculum
Hydrogenobaculum sp. SHO	NC_015587.1	1552607	Bacteria; Aquificae; Aquificales; Aquificaceae; Hydrogenobaculum
Hydrogenobaculum sp. SN	NC_020814.1	1552931	Bacteria; Aquificae; Aquificales; Aquificaceae; Hydrogenobaculum
Hydrogenobaculum sp. Y04AAS1	NC_011126.1	1559514	Bacteria; Aquificae; Aquificales; Aquificaceae; Hydrogenobaculum
Thermocrinis albus DSM 14484	NC_013894.1	1500577	Bacteria; Aquificae; Aquificales; Aquificaceae; Thermocrinis
Thermocrinis ruber strain DSM 23557	NZ_CP007028.1	1521037	Bacteria; Aquificae; Aquificales; Aquificaceae; Thermocrinis
Persephonella marina EX-H1	NC_012440.1	1930284	Bacteria; Aquificae; Aquificales; Hydrogenothermaceae; Persephonella
Sulfurihydrogenibium azorense Az-Fu1	NC_012438.1	1640877	Bacteria; Aquificae; Aquificales; Hydrogenothermaceae; Sulfurihydrogenibium
Sulfurihydrogenibium sp. YO3AOP1	NC_010730.1	1838442	Bacteria; Aquificae; Aquificales; Hydrogenothermaceae; Sulfurihydrogenibium
Desulfurobacterium thermolithotrophum DSM 11699	NC_015185.1	1541968	Bacteria; Aquificae; Desulfurobacteriales; Desulfurobacteriaceae; Desulfurobacterium
Thermovibrio ammonificans HB-1	NC_014926.1	1682965	Bacteria; Aquificae; Desulfurobacteriales; Desulfurobacteriaceae; Thermovibrio
Porphyromonas gingivalis TDC60 DNA	NC_015571.1	2339898	Bacteria; Bacteroidetes; Bacteroidia; Bacteroidales; Porphyromonadaceae; Porphyromonas
Prevotella melaninogenica ATCC 25845 chromosome II	NC_014371.1	1371874	Bacteria; Bacteroidetes; Bacteroidia; Bacteroidales; Prevotellaceae; Prevotella
Cardinium endosymbiont cEper1 of Encarsia pergandiella	NC_018605.1	887130	Bacteria; Bacteroidetes; Cytophagia; Cytophagales; Amoebophilaceae; Candidatus Cardinium
Hymenobacter sp. PAMC 26554	NZ_CP014771.1	5244843	Bacteria; Bacteroidetes; Cytophagia; Cytophagales; Hymenobacteraceae; Hymenobacter
Blattabacterium sp. (Blattella germanica) str. Bge	NC_013454.1	636850	Bacteria; Bacteroidetes; Flavobacteriia; Flavobacteriales; Blattabacteriaceae; Blattabacterium
Blattabacterium sp. (Periplaneta americana) str. BPLAN	NC_013418.2	636994	Bacteria; Bacteroidetes; Flavobacteriia; Flavobacteriales; Blattabacteriaceae; Blattabacterium
Formosa sp. Hel1_33_131	NZ_CP017260.1	2735158	Bacteria; Bacteroidetes; Flavobacteriia; Flavobacteriales; Flavobacteriaceae; Formosa
Polaribacter reichenbachii strain 6Alg 8T	NZ_CP019419.1	4125014	Bacteria; Bacteroidetes; Flavobacteriia; Flavobacteriales; Flavobacteriaceae; Polaribacter
cyanobacterium endosymbiont of Epithemia turgida isolate EtSB Lake Yunoko ETSB Lake Yunoko	NZ_AP012549.1	2794318	Bacteria; Cyanobacteria
Chroococcidiopsis thermalis PCC 7203	NC_019695.1	6315792	Bacteria; Cyanobacteria; Chroococcidiopsidales; Chroococcidiopsidaceae; Chroococcidiopsis
Gloeobacter kilaueensis JS1	NC_022600.1	4724791	Bacteria; Cyanobacteria; Gloeobacteria; Gloeobacterales; Gloeobacteraceae; Gloeobacter
Gloeobacter violaceus PCC 7421	NC_005125.1	4659019	Bacteria; Cyanobacteria; Gloeobacteria; Gloeobacterales; Gloeobacteraceae; Gloeobacter
Fischerella sp. NIES-3754	NZ_AP017305.1	5821603	Bacteria; Cyanobacteria; Nostocales; Hapalosiphonaceae; Fischerella
Anabaena cylindrica PCC 7122	NC_019771.1	6395836	Bacteria; Cyanobacteria; Nostocales; Nostocaceae; Anabaena
Anabaena sp. 90 chromosome chANA01	NC_019427.1	4329264	Bacteria; Cyanobacteria; Nostocales; Nostocaceae; Anabaena
Anabaena sp. 90 chromosome chANA02	NC_019439.1	819965	Bacteria; Cyanobacteria; Nostocales; Nostocaceae; Anabaena
Anabaena sp. WA102	NZ_CP011456.1	5705437	Bacteria; Cyanobacteria; Nostocales; Nostocaceae; Anabaena
Nostoc punctiforme PCC 73102	NC_010628.1	8234322	Bacteria; Cyanobacteria; Nostocales; Nostocaceae; Nostoc
Nostoc sp. NIES-3756	NZ_AP017295.1	6463965	Bacteria; Cyanobacteria; Nostocales; Nostocaceae; Nostoc
Nostoc sp. PCC 7107	NC_019676.1	6329823	Bacteria; Cyanobacteria; Nostocales; Nostocaceae; Nostoc
Nostoc sp. PCC 7120 DNA	NC_003272.1	6413771	Bacteria; Cyanobacteria; Nostocales; Nostocaceae; Nostoc
Nostoc sp. PCC 7524	NC_019684.1	6635030	Bacteria; Cyanobacteria; Nostocales; Nostocaceae; Nostoc
Nostoc azollae' 0708	NC_014248.1	5354700	Bacteria; Cyanobacteria; Nostocales; Nostocaceae; Trichormus
Calothrix sp. PCC 6303	NC_019751.1	6767834	Bacteria; Cyanobacteria; Nostocales; Rivulariaceae; Calothrix
Calothrix sp. PCC 7507	NC_019682.1	7023215	Bacteria; Cyanobacteria; Nostocales; Rivulariaceae; Calothrix
Rivularia sp. PCC 7116	NC_019678.1	8698463	Bacteria; Cyanobacteria; Nostocales; Rivulariaceae; Rivularia
Candidatus Atelocyanobacterium thalassa isolate ALOHA	NC_013771.1	1443806	Bacteria; Cyanobacteria; Oscillatoriophycideae; Chroococcales; Aphanothecaceae; Candidatus Atelocyanobacterium
Halothece sp. PCC 7418	NC_019779.1	4179170	Bacteria; Cyanobacteria; Oscillatoriophycideae; Chroococcales; Aphanothecaceae; Halothece cluster; Halothece
Geminocystis sp. NIES-3708	NZ_AP014815.1	3883409	Bacteria; Cyanobacteria; Oscillatoriophycideae; Chroococcales; Chroococcaceae; Geminocystis
Geminocystis sp. NIES-3709	NZ_AP014821.1	4150181	Bacteria; Cyanobacteria; Oscillatoriophycideae; Chroococcales; Chroococcaceae; Geminocystis
Gloeocapsa sp. PCC 7428	NC_019745.1	5431448	Bacteria; Cyanobacteria; Oscillatoriophycideae; Chroococcales; Chroococcaceae; Gloeocapsa
Cyanobacterium aponinum PCC 10605	NC_019776.1	4114099	Bacteria; Cyanobacteria; Oscillatoriophycideae; Chroococcales; Cyanobacteriaceae; Cyanobacterium
Microcystis aeruginosa NIES-2481	NZ_CP012070.1	4293006	Bacteria; Cyanobacteria; Oscillatoriophycideae; Chroococcales; Microcystaceae; Microcystis
Microcystis aeruginosa NIES-2481	NZ_CP012375.1	4293006	Bacteria; Cyanobacteria; Oscillatoriophycideae; Chroococcales; Microcystaceae; Microcystis
Microcystis aeruginosa NIES-2549	NZ_CP011304.1	4294213	Bacteria; Cyanobacteria; Oscillatoriophycideae; Chroococcales; Microcystaceae; Microcystis
Microcystis aeruginosa NIES-843 DNA	NC_010296.1	5842795	Bacteria; Cyanobacteria; Oscillatoriophycideae; Chroococcales; Microcystaceae; Microcystis
Cyanothece sp. ATCC 51142	NC_010546.1	4934271	Bacteria; Cyanobacteria; Oscillatoriophycideae; Oscillatoriales; Cyanothecaceae; Cyanothece
Cyanothece sp. PCC 7424	NC_011729.1	5942652	Bacteria; Cyanobacteria; Oscillatoriophycideae; Oscillatoriales; Cyanothecaceae; Cyanothece
Cyanothece sp. PCC 7822	NC_014501.1	6091620	Bacteria; Cyanobacteria; Oscillatoriophycideae; Oscillatoriales; Cyanothecaceae; Cyanothece
Cyanothece sp. PCC 8801	NC_011726.1	4679413	Bacteria; Cyanobacteria; Oscillatoriophycideae; Oscillatoriales; Cyanothecaceae; Cyanothece
Cyanothece sp. PCC 8802	NC_013161.1	4669813	Bacteria; Cyanobacteria; Oscillatoriophycideae; Oscillatoriales; Cyanothecaceae; Cyanothece
Crinalium epipsammum PCC 9333	NC_019753.1	5315554	Bacteria; Cyanobacteria; Oscillatoriophycideae; Oscillatoriales; Gomontiellaceae; Crinalium
Microcoleus sp. PCC 7113	NC_019738.1	7470429	Bacteria; Cyanobacteria; Oscillatoriophycideae; Oscillatoriales; Microcoleaceae; Microcoleus
Trichodesmium erythraeum IMS101	NC_008312.1	7750108	Bacteria; Cyanobacteria; Oscillatoriophycideae; Oscillatoriales; Microcoleaceae; Trichodesmium
Moorea producens PAL-8-15-08-1	NZ_CP017599.1	9673108	Bacteria; Cyanobacteria; Oscillatoriophycideae; Oscillatoriales; Oscillatoriaceae; Moorea
Oscillatoria acuminata PCC 6304	NC_019693.1	7689443	Bacteria; Cyanobacteria; Oscillatoriophycideae; Oscillatoriales; Oscillatoriaceae; Oscillatoria
Oscillatoria nigro-viridis PCC 7112	NC_019729.1	7479014	Bacteria; Cyanobacteria; Oscillatoriophycideae; Oscillatoriales; Oscillatoriaceae; Oscillatoria
Stanieria cyanosphaera PCC 7437	NC_019748.1	5041209	Bacteria; Cyanobacteria; Pleurocapsales; Dermocarpellaceae; Stanieria
Pleurocapsa sp. PCC 7327	NC_019689.1	4986817	Bacteria; Cyanobacteria; Pleurocapsales; Hyellaceae; Pleurocapsa
Leptolyngbya sp. NIES-3755	NZ_AP017308.1	6244812	Bacteria; Cyanobacteria; Synechococcales; Leptolyngbyaceae; Leptolyngbya
Leptolyngbya sp. O-77	NZ_AP017367.1	5480261	Bacteria; Cyanobacteria; Synechococcales; Leptolyngbyaceae; Leptolyngbya
Leptolyngbya sp. PCC 7376	NC_019683.1	5125950	Bacteria; Cyanobacteria; Synechococcales; Leptolyngbyaceae; Leptolyngbya
Synechocystis sp. PCC 6714	NZ_CP007542.1	3485441	Bacteria; Cyanobacteria; Synechococcales; Merismopediaceae; Synechocystis
Synechocystis sp. PCC 6803	NC_020286.1	3569561	Bacteria; Cyanobacteria; Synechococcales; Merismopediaceae; Synechocystis
Synechocystis sp. PCC 6803 DNA	NC_017277.1	3571103	Bacteria; Cyanobacteria; Synechococcales; Merismopediaceae; Synechocystis
Synechocystis sp. PCC 6803 substr. GT-I DNA	NC_017038.1	3570004	Bacteria; Cyanobacteria; Synechococcales; Merismopediaceae; Synechocystis
Synechocystis sp. PCC 6803 substr. PCC-N DNA	NC_017052.1	3570103	Bacteria; Cyanobacteria; Synechococcales; Merismopediaceae; Synechocystis
Synechocystis sp. PCC 6803 substr. PCC-P DNA	NC_017039.1	3570114	Bacteria; Cyanobacteria; Synechococcales; Merismopediaceae; Synechocystis
Prochlorococcus marinus MED4	NC_005072.1	1657990	Bacteria; Cyanobacteria; Synechococcales; Prochloraceae; Prochlorococcus
Pseudanabaena sp. PCC 7367	NC_019701.1	4557046	Bacteria; Cyanobacteria; Synechococcales; Pseudanabaenaceae; Pseudanabaena
Cyanobium gracile PCC 6307	NC_019675.1	3342364	Bacteria; Cyanobacteria; Synechococcales; Synechococcaceae; Cyanobium
Dactylococcopsis salina PCC 8305	NC_019780.1	3781008	Bacteria; Cyanobacteria; Synechococcales; Synechococcaceae; Dactylococcopsis
Synechococcus sp. JA-2-3B'a(2-13)	NC_007776.1	3046682	Bacteria; Cyanobacteria; Synechococcales; Synechococcaceae; Synechococcus
Synechococcus sp. JA-3-3Ab	NC_007775.1	2932766	Bacteria; Cyanobacteria; Synechococcales; Synechococcaceae; Synechococcus
Synechococcus sp. PCC 6312	NC_019680.1	3697276	Bacteria; Cyanobacteria; Synechococcales; Synechococcaceae; Synechococcus
Synechococcus sp. PCC 7002	NC_010475.1	3008047	Bacteria; Cyanobacteria; Synechococcales; Synechococcaceae; Synechococcus
Synechococcus sp. PCC 7003	NZ_CP016474.1	3057091	Bacteria; Cyanobacteria; Synechococcales; Synechococcaceae; Synechococcus
Synechococcus sp. PCC 7117	NZ_CP016477.1	3087720	Bacteria; Cyanobacteria; Synechococcales; Synechococcaceae; Synechococcus
Synechococcus sp. PCC 73109	NZ_CP013998.1	3025472	Bacteria; Cyanobacteria; Synechococcales; Synechococcaceae; Synechococcus
Synechococcus sp. PCC 7502	NC_019702.1	3510253	Bacteria; Cyanobacteria; Synechococcales; Synechococcaceae; Synechococcus
Synechococcus sp. PCC 8807	NZ_CP016483.1	3059495	Bacteria; Cyanobacteria; Synechococcales; Synechococcaceae; Synechococcus
Thermosynechococcus elongatus BP-1	NC_004113.1	2593857	Bacteria; Cyanobacteria; Synechococcales; Synechococcaceae; Thermosynechococcus
Deinococcus puniceus strain DY1	NZ_CP011382.1	2971983	Bacteria; Deinococcus-Thermus; Deinococci; Deinococcales; Deinococcaceae; Deinococcus
Deinococcus radiodurans R1 chromosome 1	NC_001263.1	2648638	Bacteria; Deinococcus-Thermus; Deinococci; Deinococcales; Deinococcaceae; Deinococcus
Deinococcus radiodurans R1 chromosome 1	NZ_CP015081.1	2646742	Bacteria; Deinococcus-Thermus; Deinococci; Deinococcales; Deinococcaceae; Deinococcus
Thermodesulfovibrio yellowstonii DSM 11347	NC_011296.1	2003803	Bacteria; Nitrospirae; Nitrospirales; Nitrospiraceae; Thermodesulfovibrio
Alpha proteobacterium HIMB59	NC_018644.1	1410127	Bacteria; Proteobacteria; Alphaproteobacteria; Pelagibacterales; Pelagibacteraceae
Bosea sp. PAMC 26642	NZ_CP014301.1	5503156	Bacteria; Proteobacteria; Alphaproteobacteria; Rhizobiales; Bradyrhizobiaceae; Bosea
Ochrobactrum pseudogrignonense strain K8 chromosome 2	NZ_CP015776.1	1042249	Bacteria; Proteobacteria; Alphaproteobacteria; Rhizobiales; Brucellaceae; Ochrobactrum
Pelagibacterium halotolerans B2	NC_016078.1	3944837	Bacteria; Proteobacteria; Alphaproteobacteria; Rhizobiales; Hyphomicrobiaceae; Pelagibacterium
Rhodomicrobium vannielii ATCC 17100	NC_014664.1	4014469	Bacteria; Proteobacteria; Alphaproteobacteria; Rhizobiales; Hyphomicrobiaceae; Rhodomicrobium
Methylobacterium aquaticum DNA	NZ_AP014704.1	5348274	Bacteria; Proteobacteria; Alphaproteobacteria; Rhizobiales; Methylobacteriaceae; Methylobacterium
Methylobacterium nodulans ORS 2060	NC_011894.1	7772460	Bacteria; Proteobacteria; Alphaproteobacteria; Rhizobiales; Methylobacteriaceae; Methylobacterium
Methylobacterium phyllosphaerae strain CBMB27	NZ_CP015367.1	6083998	Bacteria; Proteobacteria; Alphaproteobacteria; Rhizobiales; Methylobacteriaceae; Methylobacterium
Methylobacterium radiotolerans JCM 2831	NC_010505.1	6077833	Bacteria; Proteobacteria; Alphaproteobacteria; Rhizobiales; Methylobacteriaceae; Methylobacterium
Methylobacterium sp. 4-46	NC_010511.1	7659055	Bacteria; Proteobacteria; Alphaproteobacteria; Rhizobiales; Methylobacteriaceae; Methylobacterium
Methylobacterium sp. C1	NZ_CP017640.1	6459145	Bacteria; Proteobacteria; Alphaproteobacteria; Rhizobiales; Methylobacteriaceae; Methylobacterium
Methylobacterium extorquens AM1	NC_012808.1	5511322	Bacteria; Proteobacteria; Alphaproteobacteria; Rhizobiales; Methylobacteriaceae; Methylorubrum
Methylobacterium extorquens PA1	NC_010172.1	5471154	Bacteria; Proteobacteria; Alphaproteobacteria; Rhizobiales; Methylobacteriaceae; Methylorubrum
Methylobacterium populi BJ001	NC_010725.1	5800441	Bacteria; Proteobacteria; Alphaproteobacteria; Rhizobiales; Methylobacteriaceae; Methylorubrum
Mesorhizobium oceanicum strain B7	NZ_CP018171.1	5158483	Bacteria; Proteobacteria; Alphaproteobacteria; Rhizobiales; Phyllobacteriaceae; Mesorhizobium
Agrobacterium sp. RAC06	NZ_CP016499.1	4641140	Bacteria; Proteobacteria; Alphaproteobacteria; Rhizobiales; Rhizobiaceae; Rhizobium/Agrobacterium group; Agrobacterium
Agrobacterium vitis S4 chromosome 2	NC_011988.1	1283187	Bacteria; Proteobacteria; Alphaproteobacteria; Rhizobiales; Rhizobiaceae; Rhizobium/Agrobacterium group; Agrobacterium
Sinorhizobium meliloti AK83 chromosome 3	NC_015591.1	1312480	Bacteria; Proteobacteria; Alphaproteobacteria; Rhizobiales; Rhizobiaceae; Sinorhizobium/Ensifer group; Sinorhizobium
Xanthobacter autotrophicus Py2	NC_009720.1	5308934	Bacteria; Proteobacteria; Alphaproteobacteria; Rhizobiales; Xanthobacteraceae; Xanthobacter
Rhodobacter sphaeroides ATCC 17029 chromosome 2	NC_009050.1	1219053	Bacteria; Proteobacteria; Alphaproteobacteria; Rhodobacterales; Rhodobacteraceae; Rhodobacter
Acidiphilium cryptum JF-5	NC_009484.1	3389227	Bacteria; Proteobacteria; Alphaproteobacteria; Rhodospirillales; Acetobacteraceae; Acidiphilium
Acidiphilium multivorum AIU301 DNA	NC_015186.1	3749411	Bacteria; Proteobacteria; Alphaproteobacteria; Rhodospirillales; Acetobacteraceae; Acidiphilium
Azospirillum thiophilum strain BV-S chromosome 2	NZ_CP012402.1	1354909	Bacteria; Proteobacteria; Alphaproteobacteria; Rhodospirillales; Rhodospirillaceae; Azospirillum
Rhodospirillum photometricum DSM 122	NC_017059.1	3876289	Bacteria; Proteobacteria; Alphaproteobacteria; Rhodospirillales; Rhodospirillaceae; Pararhodospirillum
Rhodospirillum centenum SW	NC_011420.2	4355543	Bacteria; Proteobacteria; Alphaproteobacteria; Rhodospirillales; Rhodospirillaceae; Rhodospirillum
Wolbachia endosymbiont of Cimex lectularius wCle	NZ_AP013028.1	1250060	Bacteria; Proteobacteria; Alphaproteobacteria; Rickettsiales; Anaplasmataceae; Wolbachieae; Wolbachia
Wolbachia endosymbiont of Drosophila melanogaster	NC_002978.6	1267782	Bacteria; Proteobacteria; Alphaproteobacteria; Rickettsiales; Anaplasmataceae; Wolbachieae; Wolbachia
Wolbachia endosymbiont of Drosophila simulans wHa	NC_021089.1	1295804	Bacteria; Proteobacteria; Alphaproteobacteria; Rickettsiales; Anaplasmataceae; Wolbachieae; Wolbachia
Wolbachia endosymbiont strain TRS of Brugia malayi	NC_006833.1	1080084	Bacteria; Proteobacteria; Alphaproteobacteria; Rickettsiales; Anaplasmataceae; Wolbachieae; Wolbachia
Wolbachia sp. wRi	NC_012416.1	1445873	Bacteria; Proteobacteria; Alphaproteobacteria; Rickettsiales; Anaplasmataceae; Wolbachieae; Wolbachia
Orientia tsutsugamushi str. Ikeda DNA	NC_010793.1	2008987	Bacteria; Proteobacteria; Alphaproteobacteria; Rickettsiales; Rickettsiaceae; Rickettsieae; Orientia
Rickettsia bellii isolate An04	NZ_CP015010.1	1543886	Bacteria; Proteobacteria; Alphaproteobacteria; Rickettsiales; Rickettsiaceae; Rickettsieae; Rickettsia; belli group
Rickettsia peacockii str. Rustic	NC_012730.1	1288492	Bacteria; Proteobacteria; Alphaproteobacteria; Rickettsiales; Rickettsiaceae; Rickettsieae; Rickettsia; spotted fever group
Sphingobium chlorophenolicum L-1 chromosome 1	NC_015593.1	3080818	Bacteria; Proteobacteria; Alphaproteobacteria; Sphingomonadales; Sphingomonadaceae; Sphingobium
Sphingobium chlorophenolicum L-1 chromosome 2	NC_015594.1	1368670	Bacteria; Proteobacteria; Alphaproteobacteria; Sphingomonadales; Sphingomonadaceae; Sphingobium
Sphingobium indicum B90A	NZ_CP013070.1	3654322	Bacteria; Proteobacteria; Alphaproteobacteria; Sphingomonadales; Sphingomonadaceae; Sphingobium
Sphingobium japonicum UT26S DNA	NC_014006.1	3514822	Bacteria; Proteobacteria; Alphaproteobacteria; Sphingomonadales; Sphingomonadaceae; Sphingobium
Zymomonas mobilis subsp. mobilis ATCC 29191	NC_018145.1	1961306	Bacteria; Proteobacteria; Alphaproteobacteria; Sphingomonadales; Sphingomonadaceae; Zymomonas
Zymomonas mobilis subsp. mobilis NCIMB 11163	NC_013355.1	2124771	Bacteria; Proteobacteria; Alphaproteobacteria; Sphingomonadales; Sphingomonadaceae; Zymomonas
Zymomonas mobilis subsp. mobilis NRRL B-12526	NZ_CP003709.1	2011869	Bacteria; Proteobacteria; Alphaproteobacteria; Sphingomonadales; Sphingomonadaceae; Zymomonas
Zymomonas mobilis subsp. mobilis str. CP4 = NRRL B-14023	NZ_CP003715.1	2012455	Bacteria; Proteobacteria; Alphaproteobacteria; Sphingomonadales; Sphingomonadaceae; Zymomonas
Variovorax paradoxus S110 chromosome 2	NC_012792.1	1128644	Bacteria; Proteobacteria; Betaproteobacteria; Burkholderiales; Comamonadaceae; Variovorax
Verminephrobacter eiseniae EF01-2	NC_008786.1	5566749	Bacteria; Proteobacteria; Betaproteobacteria; Burkholderiales; Comamonadaceae; Verminephrobacter
Desulfatibacillum aliphaticivorans strain AK-01	NC_011768.1	6517073	Bacteria; Proteobacteria; Deltaproteobacteria; Desulfobacterales; Desulfobacteraceae; Desulfatibacillum
Desulfomonile tiedjei DSM 6799	NC_018025.1	6500104	Bacteria; Proteobacteria; Deltaproteobacteria; Syntrophobacterales; Syntrophaceae; Desulfomonile
Helicobacter bilis strain AAQJH	NZ_CP019645.1	2620399	Bacteria; Proteobacteria; Epsilonproteobacteria; Campylobacterales; Helicobacteraceae; Helicobacter
Helicobacter cetorum MIT 99-5656	NC_017735.1	1833666	Bacteria; Proteobacteria; Epsilonproteobacteria; Campylobacterales; Helicobacteraceae; Helicobacter
Helicobacter felis ATCC 49179	NC_014810.2	1672681	Bacteria; Proteobacteria; Epsilonproteobacteria; Campylobacterales; Helicobacteraceae; Helicobacter
Marinobacter salarius R9SW1	NZ_CP007152.1	4616532	Bacteria; Proteobacteria; Gammaproteobacteria; Alteromonadales; Alteromonadaceae; Marinobacter
Pseudoalteromonas haloplanktis str. TAC125 chromosome II	NC_007482.1	635328	Bacteria; Proteobacteria; Gammaproteobacteria; Alteromonadales; Pseudoalteromonadaceae; Pseudoalteromonas
Pseudoalteromonas issachenkonii strain KCTC 12958 chromosome II	NZ_CP013351.1	729217	Bacteria; Proteobacteria; Gammaproteobacteria; Alteromonadales; Pseudoalteromonadaceae; Pseudoalteromonas
Pseudoalteromonas luteoviolacea strain S4054 chromosome 2	NZ_CP015416.1	1321025	Bacteria; Proteobacteria; Gammaproteobacteria; Alteromonadales; Pseudoalteromonadaceae; Pseudoalteromonas
Pseudoalteromonas luteoviolacea strain S40542 chromosome 2	NZ_CP015414.1	1321127	Bacteria; Proteobacteria; Gammaproteobacteria; Alteromonadales; Pseudoalteromonadaceae; Pseudoalteromonas
Pseudoalteromonas luteoviolacea strain S4054249 chromosome 2	NZ_CP015412.1	1321096	Bacteria; Proteobacteria; Gammaproteobacteria; Alteromonadales; Pseudoalteromonadaceae; Pseudoalteromonas
Pseudoalteromonas phenolica strain KCTC 12086 chromosome II	NZ_CP013188.1	1023473	Bacteria; Proteobacteria; Gammaproteobacteria; Alteromonadales; Pseudoalteromonadaceae; Pseudoalteromonas
Pseudoalteromonas rubra strain SCSIO 6842 chromosome 2	NZ_CP013612.1	1311023	Bacteria; Proteobacteria; Gammaproteobacteria; Alteromonadales; Pseudoalteromonadaceae; Pseudoalteromonas
Pseudoalteromonas sp. SM9913 chromosome II	NC_014800.1	704884	Bacteria; Proteobacteria; Gammaproteobacteria; Alteromonadales; Pseudoalteromonadaceae; Pseudoalteromonas
Pseudoalteromonas translucida KMM 520 chromosome II	NZ_CP011035.1	757205	Bacteria; Proteobacteria; Gammaproteobacteria; Alteromonadales; Pseudoalteromonadaceae; Pseudoalteromonas
Baumannia cicadellinicola str. Hc (Homalodisca coagulata)	NC_007984.1	686194	Bacteria; Proteobacteria; Gammaproteobacteria; Candidatus Baumannia
Candidatus Baumannia cicadellinicola strain BGSS	NZ_CP008985.1	759425	Bacteria; Proteobacteria; Gammaproteobacteria; Candidatus Baumannia
Enterobacteriaceae bacterium symbiont of Maconellicoccus hirsutus isolate DEMHIR genome assembly, chromosome: I	NZ_LN999833.1	834734	Bacteria; Proteobacteria; Gammaproteobacteria; Enterobacterales; Enterobacteriaceae; Candidatus Doolittlea
Enterobacteriaceae bacterium symbiont of Ferrisia virgata isolate GEFVIR genome assembly, chromosome: I	NZ_LN999832.1	938041	Bacteria; Proteobacteria; Gammaproteobacteria; Enterobacterales; Enterobacteriaceae; Candidatus Gullanella
Candidatus Ishikawaella capsulata Mpkobe DNA	NZ_AP010872.1	745590	Bacteria; Proteobacteria; Gammaproteobacteria; Enterobacterales; Enterobacteriaceae; Candidatus Ishikawaella
Candidatus Riesia pediculicola USDA	NC_014109.1	574390	Bacteria; Proteobacteria; Gammaproteobacteria; Enterobacterales; Enterobacteriaceae; Candidatus Riesia
Candidatus Tachikawaea gelatinosa DNA	NZ_AP014521.1	708439	Bacteria; Proteobacteria; Gammaproteobacteria; Enterobacterales; Enterobacteriaceae; Candidatus Tachikawaea
Wigglesworthia glossinidia endosymbiont of Glossina brevipalpis DNA	NC_004344.2	697724	Bacteria; Proteobacteria; Gammaproteobacteria; Enterobacterales; Erwiniaceae; Wigglesworthia
Wigglesworthia glossinidia endosymbiont of Glossina morsitans morsitans (Yale colony)	NC_016893.1	719535	Bacteria; Proteobacteria; Gammaproteobacteria; Enterobacterales; Erwiniaceae; Wigglesworthia
[Haemophilus] parasuis strain CL120103	NZ_CP020085.1	2305354	Bacteria; Proteobacteria; Gammaproteobacteria; Pasteurellales; Pasteurellaceae; Glaesserella
[Haemophilus] parasuis strain SC1401	NZ_CP015099.1	2277540	Bacteria; Proteobacteria; Gammaproteobacteria; Pasteurellales; Pasteurellaceae; Glaesserella
Haemophilus parasuis SH0165	NC_011852.1	2269156	Bacteria; Proteobacteria; Gammaproteobacteria; Pasteurellales; Pasteurellaceae; Glaesserella
Pseudomonas fluorescens strain L111	NZ_CP015638.1	6606606	Bacteria; Proteobacteria; Gammaproteobacteria; Pseudomonadales; Pseudomonadaceae; Pseudomonas
Pseudomonas fluorescens strain L321	NZ_CP015637.1	6641144	Bacteria; Proteobacteria; Gammaproteobacteria; Pseudomonadales; Pseudomonadaceae; Pseudomonas
Francisella noatunensis subsp. orientalis str. Toba 04	NC_017909.1	1847202	Bacteria; Proteobacteria; Gammaproteobacteria; Thiotrichales; Francisellaceae; Francisella
Beggiatoa leptomitoformis strain D-402 chromosome	NZ_CP012373.1	4265296	Bacteria; Proteobacteria; Gammaproteobacteria; Thiotrichales; Thiotrichaceae; Beggiatoa
Thioploca ingrica	NZ_AP014633.1	4810005	Bacteria; Proteobacteria; Gammaproteobacteria; Thiotrichales; Thiotrichaceae; Thioploca
Lysobacter antibioticus strain ATCC 29479	NZ_CP013141.1	5765176	Bacteria; Proteobacteria; Gammaproteobacteria; Xanthomonadales; Xanthomonadaceae; Lysobacter
Stenotrophomonas sp. YM1	NZ_CP014274.1	4541594	Bacteria; Proteobacteria; Gammaproteobacteria; Xanthomonadales; Xanthomonadaceae; Stenotrophomonas
Candidatus Phytoplasma australiense	NC_010544.1	879959	Bacteria; Tenericutes; Mollicutes; Acholeplasmatales; Acholeplasmataceae; Candidatus Phytoplasma; 16SrXII (Stolbur group)
Strawberry lethal yellows phytoplasma (CPA) str. NZSb11	NC_021236.1	959779	Bacteria; Tenericutes; Mollicutes; Acholeplasmatales; Acholeplasmataceae; Candidatus Phytoplasma; 16SrXII (Stolbur group)
Aster yellows witches'-broom phytoplasma AYWB	NC_007716.1	706569	Bacteria; Tenericutes; Mollicutes; Acholeplasmatales; Acholeplasmataceae; Candidatus Phytoplasma; Candidatus Phytoplasma asteris
Mycoplasma arthritidis 158L3-1	NC_011025.1	820453	Bacteria; Tenericutes; Mollicutes; Mycoplasmataceae; Mycoplasma
Mycoplasma bovis PG45 clone MU clone A2	NC_014760.1	1003404	Bacteria; Tenericutes; Mollicutes; Mycoplasmataceae; Mycoplasma
Mycoplasma canadense HAZ360_1	NZ_AP014631.1	693241	Bacteria; Tenericutes; Mollicutes; Mycoplasmataceae; Mycoplasma
Mycoplasma crocodyli MP145	NC_014014.1	934379	Bacteria; Tenericutes; Mollicutes; Mycoplasmataceae; Mycoplasma
Mycoplasma fermentans M64	NC_014921.1	1118751	Bacteria; Tenericutes; Mollicutes; Mycoplasmataceae; Mycoplasma
Mycoplasma hyopneumoniae 168	NC_017509.1	925576	Bacteria; Tenericutes; Mollicutes; Mycoplasmataceae; Mycoplasma
Mycoplasma hyopneumoniae 168-L	NC_021283.1	921093	Bacteria; Tenericutes; Mollicutes; Mycoplasmataceae; Mycoplasma
Mycoplasma hyopneumoniae 232	NC_006360.1	892758	Bacteria; Tenericutes; Mollicutes; Mycoplasmataceae; Mycoplasma
Mycoplasma hyopneumoniae 7422	NC_021831.1	898495	Bacteria; Tenericutes; Mollicutes; Mycoplasmataceae; Mycoplasma
Mycoplasma hyopneumoniae 7448	NC_007332.1	920079	Bacteria; Tenericutes; Mollicutes; Mycoplasmataceae; Mycoplasma
Mycoplasma hyopneumoniae J	NC_007295.1	897405	Bacteria; Tenericutes; Mollicutes; Mycoplasmataceae; Mycoplasma
Mycoplasma hyorhinis GDL-1	NC_016829.1	837480	Bacteria; Tenericutes; Mollicutes; Mycoplasmataceae; Mycoplasma
Mycoplasma hyorhinis HUB-1	NC_014448.1	839615	Bacteria; Tenericutes; Mollicutes; Mycoplasmataceae; Mycoplasma
Mycoplasma hyorhinis MCLD	NC_017519.1	829709	Bacteria; Tenericutes; Mollicutes; Mycoplasmataceae; Mycoplasma
Mycoplasma hyorhinis SK76	NC_019552.1	836897	Bacteria; Tenericutes; Mollicutes; Mycoplasmataceae; Mycoplasma
Mycoplasma mobile 163K	NC_006908.1	777079	Bacteria; Tenericutes; Mollicutes; Mycoplasmataceae; Mycoplasma
Mycoplasma mycoides subsp. mycoides SC str. PG1	NC_005364.2	1211703	Bacteria; Tenericutes; Mollicutes; Mycoplasmataceae; Mycoplasma
Mycoplasma ovis str. Michigan	NC_023062.1	702511	Bacteria; Tenericutes; Mollicutes; Mycoplasmataceae; Mycoplasma
Mycoplasma synoviae 53	NC_007294.1	799476	Bacteria; Tenericutes; Mollicutes; Mycoplasmataceae; Mycoplasma
Mycoplasma wenyonii str. Massachusetts	NC_018149.1	650228	Bacteria; Tenericutes; Mollicutes; Mycoplasmataceae; Mycoplasma
Caldimicrobium thiodismutans	NZ_AP014945.1	1814952	Bacteria; Thermodesulfobacteria; Thermodesulfobacteriales; Thermodesulfobacteriaceae; Caldimicrobium
Kosmotoga olearia TBF 19.5.1	NC_012785.1	2302126	Bacteria; Thermotogae; Kosmotogales; Kosmotogaceae; Kosmotoga
Mesotoga prima MesG1.Ag.4.2	NC_017934.1	2974229	Bacteria; Thermotogae; Kosmotogales; Kosmotogaceae; Mesotoga
Petrotoga mobilis SJ95	NC_010003.1	2169548	Bacteria; Thermotogae; Petrotogales; Petrotogaceae; Petrotoga
Fervidobacterium nodosum Rt17-B1	NC_009718.1	1948941	Bacteria; Thermotogae; Thermotogales; Fervidobacteriaceae; Fervidobacterium
Fervidobacterium pennivorans strain DYC	NZ_CP011387.1	2061852	Bacteria; Thermotogae; Thermotogales; Fervidobacteriaceae; Fervidobacterium
Fervidobacterium pennivorans strain DYC	NZ_CP011393.1	2061852	Bacteria; Thermotogae; Thermotogales; Fervidobacteriaceae; Fervidobacterium
Thermosipho africanus TCF52B	NC_011653.1	2016657	Bacteria; Thermotogae; Thermotogales; Fervidobacteriaceae; Thermosipho
Pseudothermotoga hypogea DSM 11164 = NBRC 106472 DNA	NC_022795.1	2165165	Bacteria; Thermotogae; Thermotogales; Thermotogaceae; Pseudothermotoga
Pseudothermotoga thermarum DSM 5069	NC_015707.1	2039943	Bacteria; Thermotogae; Thermotogales; Thermotogaceae; Pseudothermotoga
Thermotoga naphthophila RKU-10	NC_013642.1	1809823	Bacteria; Thermotogae; Thermotogales; Thermotogaceae; Thermotoga
Thermotoga neapolitana DSM 4359	NC_011978.1	1884562	Bacteria; Thermotogae; Thermotogales; Thermotogaceae; Thermotoga
Thermotoga petrophila RKU-1	NC_009486.1	1823511	Bacteria; Thermotogae; Thermotogales; Thermotogaceae; Thermotoga
Thermotoga sp. 2812B	NZ_CP003408.1	1843731	Bacteria; Thermotogae; Thermotogales; Thermotogaceae; Thermotoga
Thermotoga sp. RQ2	NC_010483.1	1877693	Bacteria; Thermotogae; Thermotogales; Thermotogaceae; Thermotoga
Nocardia farcinica genome assembly NCTC11134, plasmid : 2	NZ_LN868939.1	2657929	Bacteria; Actinobacteria; Corynebacteriales; Nocardiaceae; Nocardia
Rhodococcus opacus strain 1CP plasmid pR1CP1	NZ_CP009112.1	885383	Bacteria; Actinobacteria; Corynebacteriales; Nocardiaceae; Rhodococcus
Cyanothece sp. PCC 7822 plasmid Cy782201	NC_014533.1	879545	Bacteria; Cyanobacteria; Oscillatoriophycideae; Oscillatoriales; Cyanothecaceae; Cyanothece
Methylobacterium aquaticum plasmid pMaq22A_1p DNA	NZ_AP014705.1	1571989	Bacteria; Proteobacteria; Alphaproteobacteria; Rhizobiales; Methylobacteriaceae; Methylobacterium
Methylobacterium extorquens AM1 megaplasmid	NC_012811.1	1261460	Bacteria; Proteobacteria; Alphaproteobacteria; Rhizobiales; Methylobacteriaceae; Methylorubrum
Rhizobium leguminosarum bv. trifolii CB782 plasmid	NZ_CP007069.1	509829	Bacteria; Proteobacteria; Alphaproteobacteria; Rhizobiales; Rhizobiaceae; Rhizobium/Agrobacterium group; Rhizobium
Rhizobium phaseoli strain N931 plasmid pRphaN931d	NZ_CP013556.1	1165895	Bacteria; Proteobacteria; Alphaproteobacteria; Rhizobiales; Rhizobiaceae; Rhizobium/Agrobacterium group; Rhizobium
Rhizobium phaseoli strain N841 plasmid pRphaN841e	NZ_CP013562.1	1201422	Bacteria; Proteobacteria; Alphaproteobacteria; Rhizobiales; Rhizobiaceae; Rhizobium/Agrobacterium group; Rhizobium
Rhizobium phaseoli strain N831 plasmid pRphaN831d	NZ_CP013567.1	1165895	Bacteria; Proteobacteria; Alphaproteobacteria; Rhizobiales; Rhizobiaceae; Rhizobium/Agrobacterium group; Rhizobium
Rhizobium phaseoli strain N771 plasmid pRphaN771e	NZ_CP013573.1	1189373	Bacteria; Proteobacteria; Alphaproteobacteria; Rhizobiales; Rhizobiaceae; Rhizobium/Agrobacterium group; Rhizobium
Rhizobium phaseoli strain N671 plasmid pRphaN671e	NZ_CP013579.1	1189373	Bacteria; Proteobacteria; Alphaproteobacteria; Rhizobiales; Rhizobiaceae; Rhizobium/Agrobacterium group; Rhizobium
Rhizobium phaseoli strain N261 plasmid pRphaN261d	NZ_CP013584.1	1074794	Bacteria; Proteobacteria; Alphaproteobacteria; Rhizobiales; Rhizobiaceae; Rhizobium/Agrobacterium group; Rhizobium
Rhizobium phaseoli strain N161 plasmid pRphaN161d	NZ_CP013589.1	1048055	Bacteria; Proteobacteria; Alphaproteobacteria; Rhizobiales; Rhizobiaceae; Rhizobium/Agrobacterium group; Rhizobium
Paracoccus aminophilus JCM 7686 plasmid pAMI4	NC_022049.1	438126	Bacteria; Proteobacteria; Alphaproteobacteria; Rhodobacterales; Rhodobacteraceae; Paracoccus
Tistrella mobilis KA081020-065 plasmid pTM3	NC_017958.1	1126962	Bacteria; Proteobacteria; Alphaproteobacteria; Rhodospirillales; Rhodospirillaceae; Tistrella
Salmonella enterica subsp. enterica serovar Senftenberg genome assembly NCTC10384, plasmid : 2	NZ_LN868944.1	727905	Bacteria; Proteobacteria; Gammaproteobacteria; Enterobacterales; Enterobacteriaceae; Salmonella
