# Supplementary material for: Accurate and complete genomes from metagenomes
Source: Genome Res. 2020 Mar;30(3):315–33. doi: 10.1101/gr.258640.119 (PMC7111523; doi:10.1101/gr.258640.119)
Supplement: Supplemental Material [file supp_gr.258640.119_Supplemental_Table_S7.xlsx]

## Sheet: Table S7
Table S7. General information of bacterial genomes with rolling circle replication
Genome	NCBI accession number	Genome size (bp)	Taxonomic information
Bifidobacterium longum DJO10A	NC_010816.1	2375792	Bacteria; Actinobacteria; Bifidobacteriales; Bifidobacteriaceae; Bifidobacterium
Stackebrandtia nassauensis DSM 44728	NC_013947.1	6841557	Bacteria; Actinobacteria; Glycomycetales; Glycomycetaceae; Stackebrandtia
Rathayibacter tritici strain NCPPB 1953	NZ_CP015515.1	3354681	Bacteria; Actinobacteria; Micrococcales; Microbacteriaceae; Rathayibacter
Sanguibacter keddieii DSM 10542	NC_013521.1	4253413	Bacteria; Actinobacteria; Micrococcales; Sanguibacteraceae; Sanguibacter
Micromonospora sp. L5	NC_014815.1	6962533	Bacteria; Actinobacteria; Micromonosporales; Micromonosporaceae; Micromonospora
Pimelobacter simplex strain VKM Ac-2033D	NZ_CP009896.1	5637360	Bacteria; Actinobacteria; Propionibacteriales; Nocardioidaceae; Pimelobacter
Thermocrinis ruber strain DSM 23557	NZ_CP007028.1	1521037	Bacteria; Aquificae; Aquificales; Aquificaceae; Thermocrinis
Persephonella marina EX-H1	NC_012440.1	1930284	Bacteria; Aquificae; Aquificales; Hydrogenothermaceae; Persephonella
Chroococcidiopsis thermalis PCC 7203	NC_019695.1	6315792	Bacteria; Cyanobacteria; Chroococcidiopsidales; Chroococcidiopsidaceae; Chroococcidiopsis
Nostoc azollae' 0708	NC_014248.1	5354700	Bacteria; Cyanobacteria; Nostocales; Nostocaceae; Trichormus
Candidatus Atelocyanobacterium thalassa isolate ALOHA	NC_013771.1	1443806	Bacteria; Cyanobacteria; Oscillatoriophycideae; Chroococcales; Aphanothecaceae; Candidatus Atelocyanobacterium
Synechocystis sp. PCC 6803 substr. GT-I DNA	NC_017038.1	3570004	Bacteria; Cyanobacteria; Synechococcales; Merismopediaceae; Synechocystis
Synechocystis sp. PCC 6803 substr. PCC-P DNA	NC_017039.1	3570114	Bacteria; Cyanobacteria; Synechococcales; Merismopediaceae; Synechocystis
Synechocystis sp. PCC 6803 substr. PCC-N DNA	NC_017052.1	3570103	Bacteria; Cyanobacteria; Synechococcales; Merismopediaceae; Synechocystis
Synechocystis sp. PCC 6803 DNA	NC_017277.1	3571103	Bacteria; Cyanobacteria; Synechococcales; Merismopediaceae; Synechocystis
Synechocystis sp. PCC 6803	NC_020286.1	3569561	Bacteria; Cyanobacteria; Synechococcales; Merismopediaceae; Synechocystis
Hyphomicrobium denitrificans ATCC 51888	NC_014313.1	3638969	Bacteria; Proteobacteria; Alphaproteobacteria; Rhizobiales; Hyphomicrobiaceae; Hyphomicrobium
Pelagibacterium halotolerans B2	NC_016078.1	3944837	Bacteria; Proteobacteria; Alphaproteobacteria; Rhizobiales; Hyphomicrobiaceae; Pelagibacterium
Methylobacterium radiotolerans JCM 2831	NC_010505.1	6077833	Bacteria; Proteobacteria; Alphaproteobacteria; Rhizobiales; Methylobacteriaceae; Methylobacterium
Agrobacterium sp. RAC06	NZ_CP016499.1	4641140	Bacteria; Proteobacteria; Alphaproteobacteria; Rhizobiales; Rhizobiaceae; Rhizobium/Agrobacterium group; Agrobacterium
Xanthobacter autotrophicus Py2	NC_009720.1	5308934	Bacteria; Proteobacteria; Alphaproteobacteria; Rhizobiales; Xanthobacteraceae; Xanthobacter
Zymomonas mobilis subsp. mobilis NCIMB 11163	NC_013355.1	2124771	Bacteria; Proteobacteria; Alphaproteobacteria; Sphingomonadales; Sphingomonadaceae; Zymomonas
Helicobacter felis ATCC 49179	NC_014810.2	1672681	Bacteria; Proteobacteria; Epsilonproteobacteria; Campylobacterales; Helicobacteraceae; Helicobacter
gamma proteobacterium HdN1	NC_014366.1	4587455	Bacteria; Proteobacteria; Gammaproteobacteria
Marinobacter salarius strain R9SW1	NZ_CP007152.1	4616532	Bacteria; Proteobacteria; Gammaproteobacteria; Alteromonadales; Alteromonadaceae; Marinobacter
Halorhodospira halophila SL1	NC_008789.1	2678452	Bacteria; Proteobacteria; Gammaproteobacteria; Chromatiales; Ectothiorhodospiraceae; Halorhodospira
Francisella noatunensis subsp. orientalis str. Toba 04	NC_017909.1	1847202	Bacteria; Proteobacteria; Gammaproteobacteria; Thiotrichales; Francisellaceae; Francisella
Stenotrophomonas sp. KCTC 12332	NZ_CP014274.1	4541594	Bacteria; Proteobacteria; Gammaproteobacteria; Xanthomonadales; Xanthomonadaceae; Stenotrophomonas
Caldimicrobium thiodismutans DNA	NZ_AP014945.1	1814952	Bacteria; Thermodesulfobacteria; Thermodesulfobacteriales; Thermodesulfobacteriaceae; Caldimicrobium
Pseudothermotoga thermarum DSM 5069	NC_015707.1	2039943	Bacteria; Thermotogae; Thermotogales; Thermotogaceae; Pseudothermotoga
Thermotoga naphthophila RKU-10	NC_013642.1	1809823	Bacteria; Thermotogae; Thermotogales; Thermotogaceae; Thermotoga
