# Supplementary material for: Accurate and complete genomes from metagenomes
Source: Genome Res. 2020 Mar;30(3):315–33. doi: 10.1101/gr.258640.119 (PMC7111523; doi:10.1101/gr.258640.119)
Supplement: Supplemental Material [file supp_gr.258640.119_Supplemental_Table_S8.xlsx]

## Sheet: Table S8
Table S8. General information of archaeal genomes with GC skew detected
Genome	NCBI accession number	Genome size (bp)	Taxonomic information
Natronomonas pharaonis DSM 2160	NC_007426.1	2595221	Archaea; Euryarchaeota; Halobacteria; Halobacteriales; Haloarculaceae; Natronomonas
Halobacterium sp. NRC-1	NC_002607.1	2014239	Archaea; Euryarchaeota; Halobacteria; Halobacteriales; Halobacteriaceae; Halobacterium
Methanobacterium paludis strain SWAN1	NC_015574.1	2546541	Archaea; Euryarchaeota; Methanobacteria; Methanobacteriales; Methanobacteriaceae; Methanobacterium
Methanobrevibacter ruminantium M1	NC_013790.1	2937203	Archaea; Euryarchaeota; Methanobacteria; Methanobacteriales; Methanobacteriaceae; Methanobrevibacter
Methanobrevibacter sp. AbM4	NC_021355.1	1998189	Archaea; Euryarchaeota; Methanobacteria; Methanobacteriales; Methanobacteriaceae; Methanobrevibacter
Methanobrevibacter sp. YE315	NZ_CP010834.1	2273296	Archaea; Euryarchaeota; Methanobacteria; Methanobacteriales; Methanobacteriaceae; Methanobrevibacter
Methanobrevibacter millerae strain SM9	NZ_CP011266.1	2543538	Archaea; Euryarchaeota; Methanobacteria; Methanobacteriales; Methanobacteriaceae; Methanobrevibacter
Methanobrevibacter olleyae strain YLM1	NZ_CP014265.1	2201192	Archaea; Euryarchaeota; Methanobacteria; Methanobacteriales; Methanobacteriaceae; Methanobrevibacter
Methanosphaera stadtmanae DSM 3091	NC_007681.1	1767403	Archaea; Euryarchaeota; Methanobacteria; Methanobacteriales; Methanobacteriaceae; Methanosphaera
Methanothermobacter thermautotrophicus str. Delta H	NC_000916.1	1751377	Archaea; Euryarchaeota; Methanobacteria; Methanobacteriales; Methanobacteriaceae; Methanothermobacter
Methanothermobacter marburgensis str. Marburg	NC_014408.1	1634695	Archaea; Euryarchaeota; Methanobacteria; Methanobacteriales; Methanobacteriaceae; Methanothermobacter
Methanothermobacter wolfeii isolate SIV6	NZ_LT608329.1	1686891	Archaea; Euryarchaeota; Methanobacteria; Methanobacteriales; Methanobacteriaceae; Methanothermobacter
Methanoculleus marisnigri JR1	NC_009051.1	2478101	Archaea; Euryarchaeota; Methanomicrobia; Methanomicrobiales; Methanomicrobiaceae; Methanoculleus
Methanosphaerula palustris E1-9c	NC_011832.1	2922917	Archaea; Euryarchaeota; Methanomicrobia; Methanomicrobiales; Methanoregulaceae; Methanosphaerula
Methanohalophilus mahii DSM 5219	NC_014002.1	2012424	Archaea; Euryarchaeota; Methanomicrobia; Methanosarcinales; Methanosarcinaceae; Methanohalophilus
Methanosalsum zhilinae DSM 4017	NC_015676.1	2138444	Archaea; Euryarchaeota; Methanomicrobia; Methanosarcinales; Methanosarcinaceae; Methanosalsum
Pyrococcus sp. ST04	NC_017946.1	1736885	Archaea; Euryarchaeota; Thermococci; Thermococcales; Thermococcaceae; Pyrococcus
Thermococcus sibiricus MM 739	NC_012883.1	1845800	Archaea; Euryarchaeota; Thermococci; Thermococcales; Thermococcaceae; Thermococcus
