# Supplementary material for: Accurate and complete genomes from metagenomes
Source: HighWire-hosted journal article supplement (doi:10.1101/gr.258640.119), 2020-03-01
Supplement: Supplemental_Fig_S3.pdf [file Supplemental_Fig_S3.pdf]

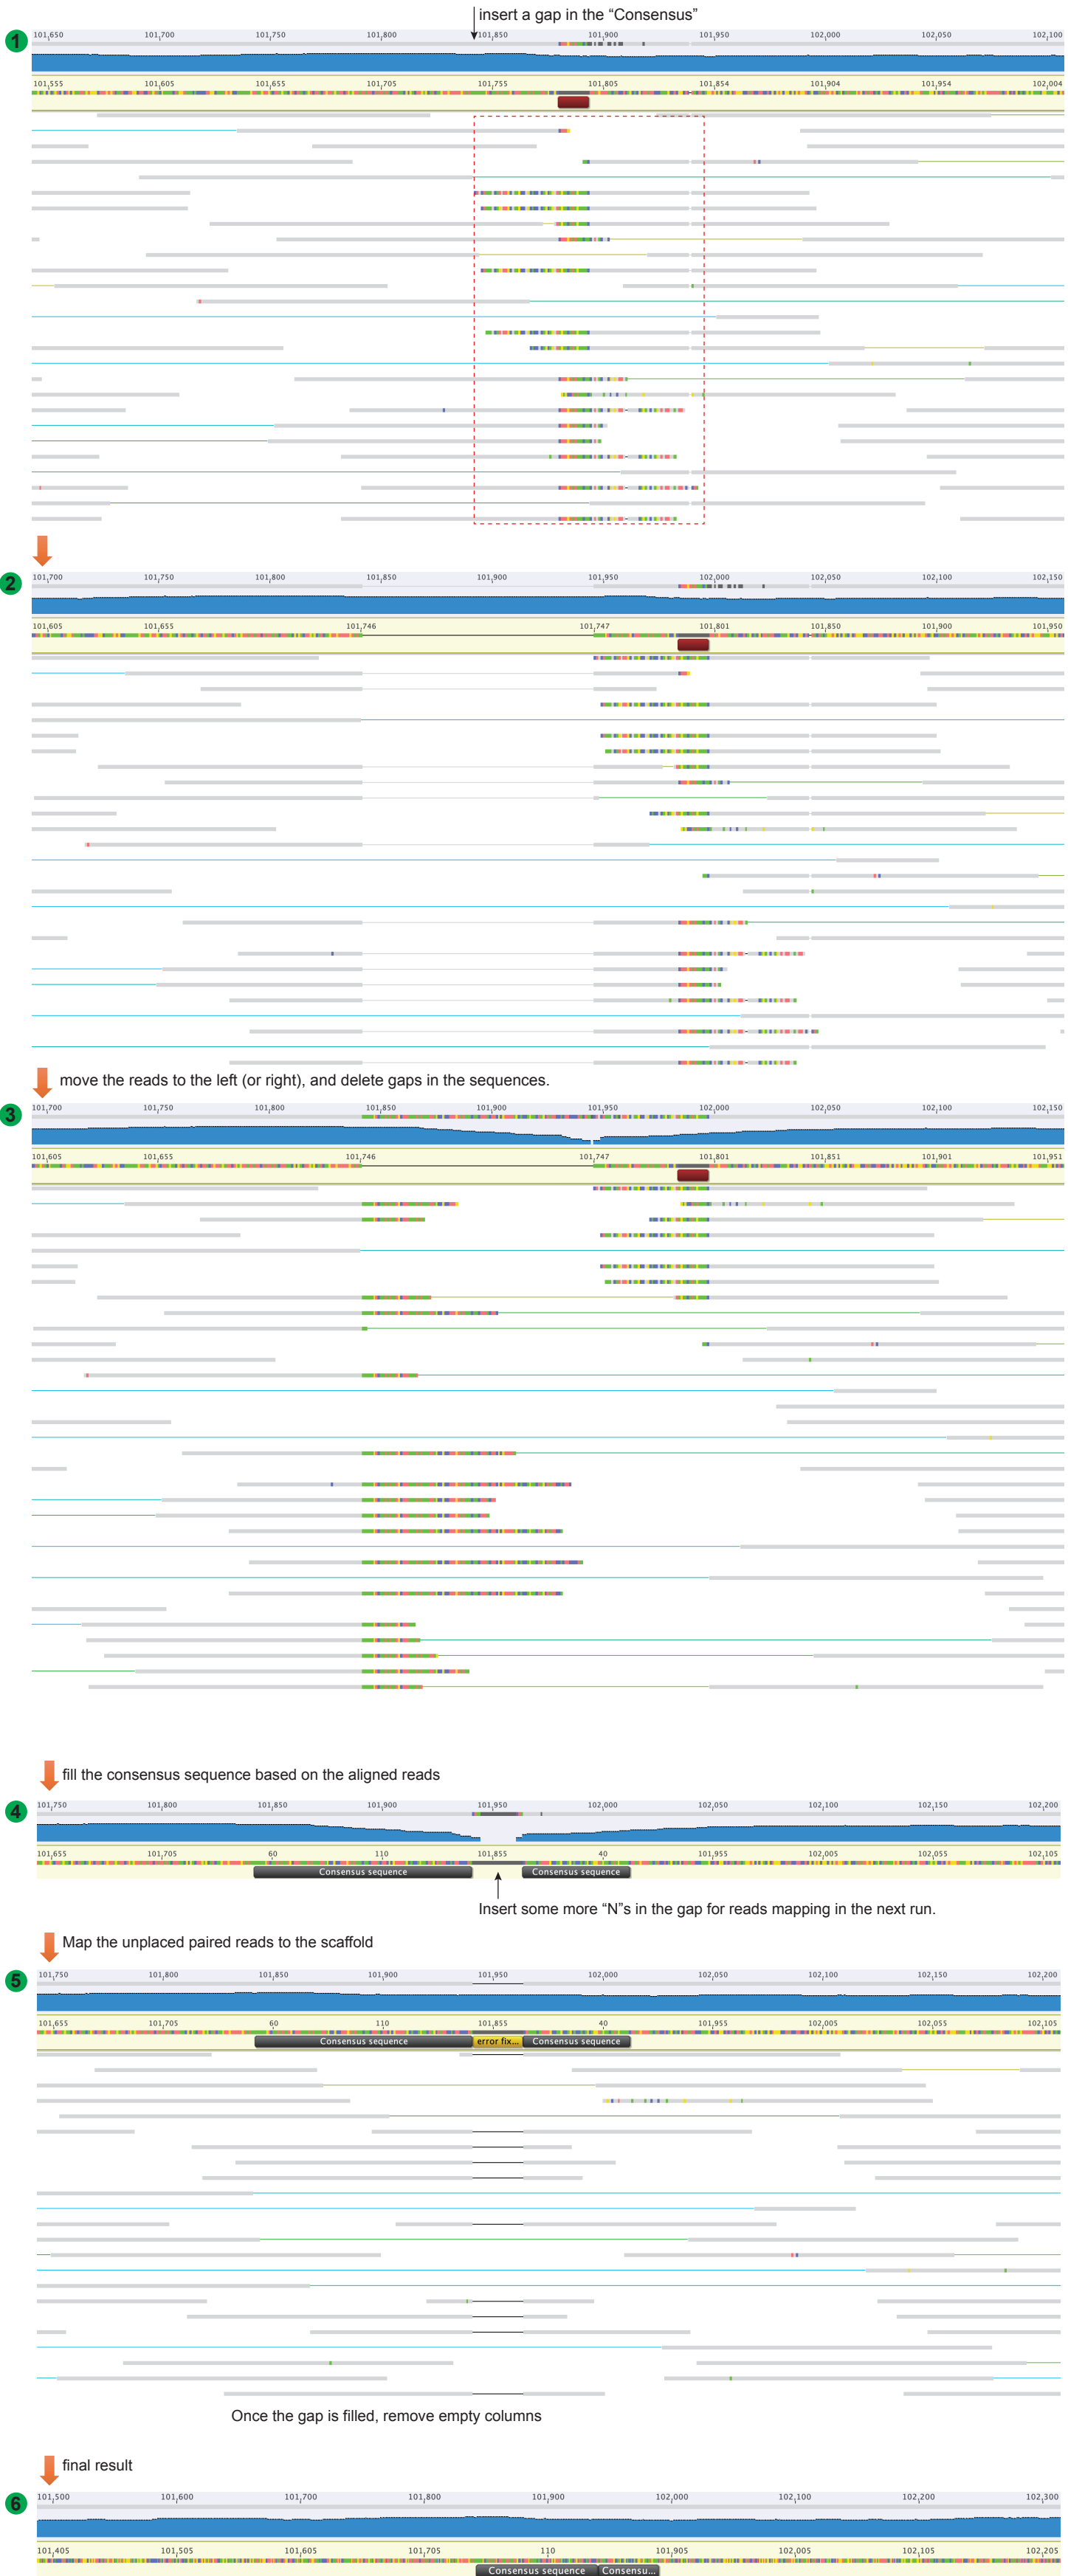

**Supplemental Fig S3.** Diagrams showing the procedure used to fix a local assembly error using unplaced paired-end reads mapped to the problem region after opening a gap.
