# Supplementary material for: Accurate and complete genomes from metagenomes
Source: HighWire-hosted journal article supplement (doi:10.1101/gr.258640.119), 2020-03-01
Supplement: Supplemental_Fig_S4.pdf [file Supplemental_Fig_S4.pdf]

Ns were wrongly inserted during scaffolding. The sequences flanking the Ns are the same, so the Ns can be deleted and duplicated sequence removed.

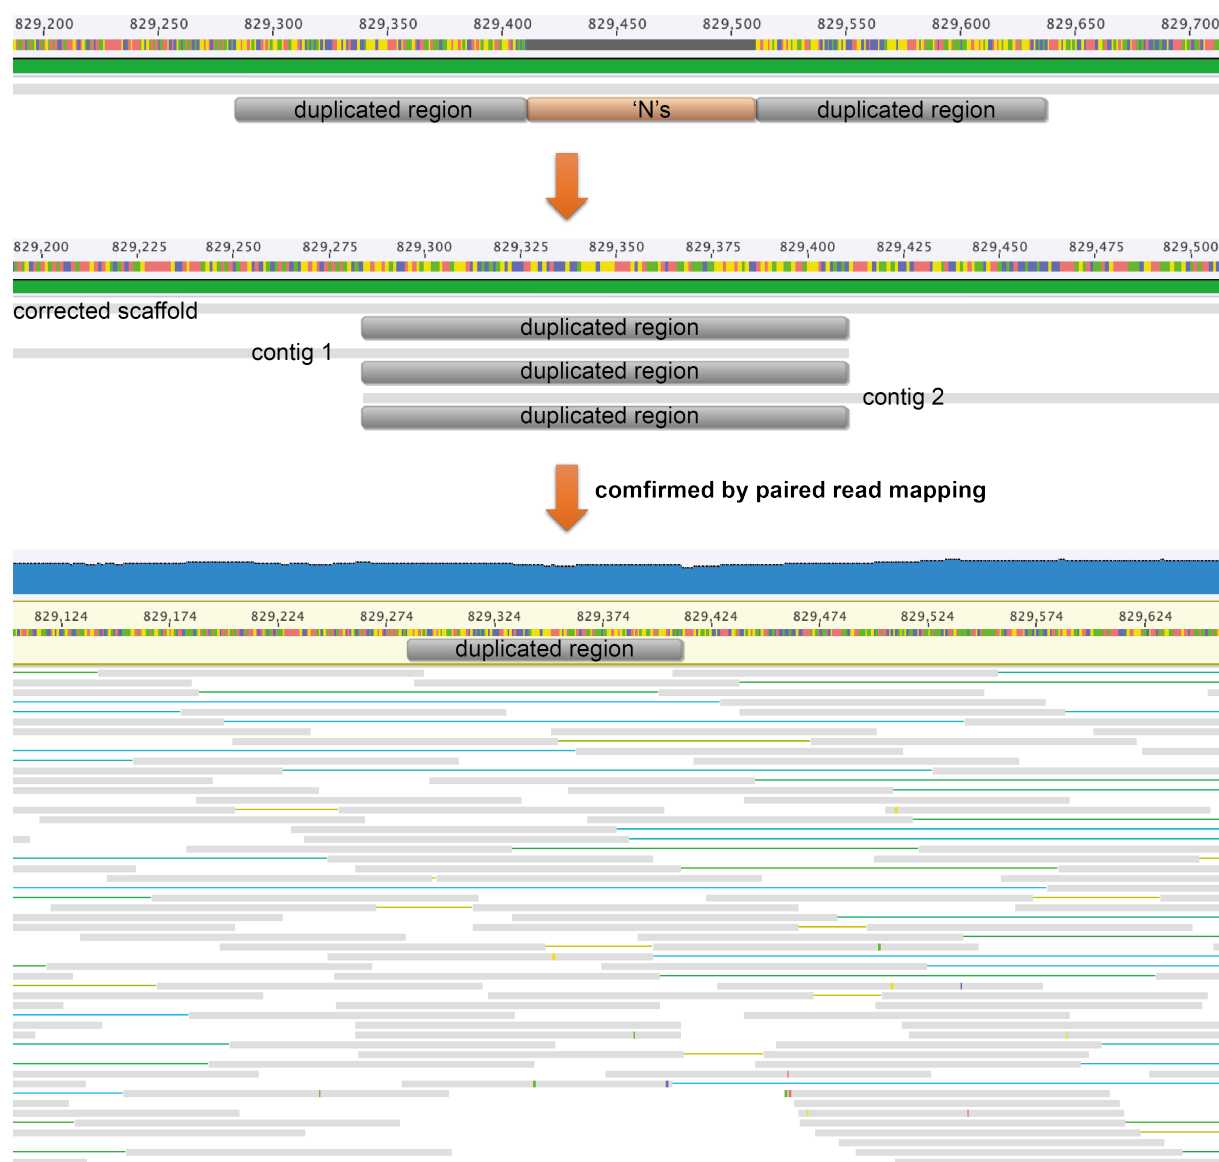

**Supplemental Fig S4.** The diagram shows a local error where Ns were wrongly inserted during the scaffolding step.
