# Supplementary material for: Accurate and complete genomes from metagenomes
Source: HighWire-hosted journal article supplement (doi:10.1101/gr.258640.119), 2020-03-01
Supplement: Supplemental_Fig_S7.pdf [file Supplemental_Fig_S7.pdf]

**(a) *Acinetobacter baumannii* (CP007712.1)**

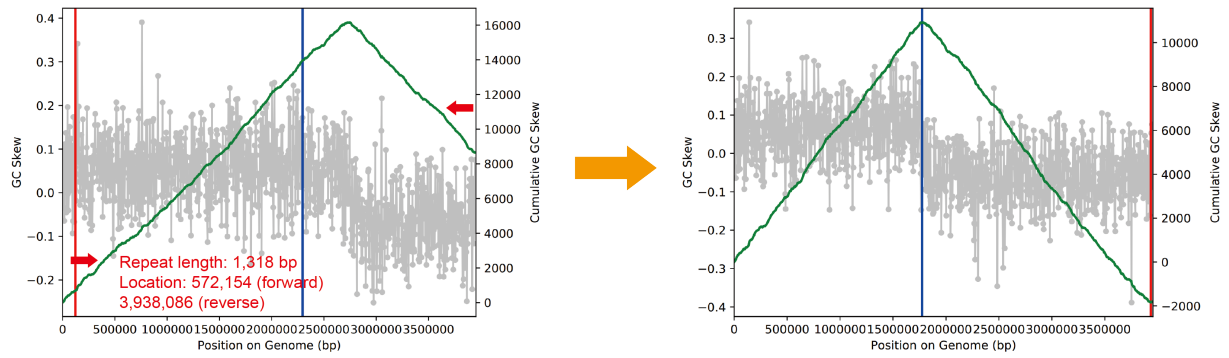

**(b) *Bacillus anthracis* str. CDC 684 (NC\_012581.1)**

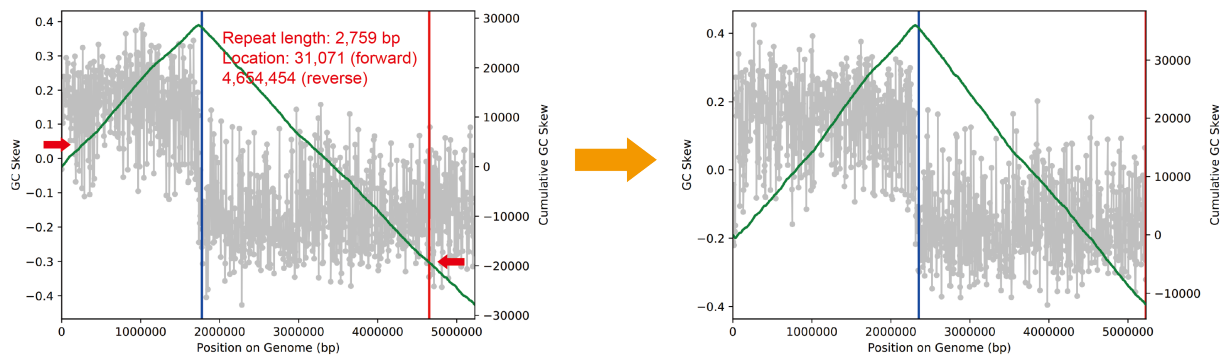

—●— GC Skew    — Cumulative Skew    — Ori site    — Ter site

**Supplemental Fig S7.** Additional examples where abnormal patterns of GC skew and cumulative GC skew suggested the presence of assembly errors in RefSeq bacterial genomes. We identified repeats (likely longer than the distance spanned by paired reads) that were in reverse complemented orientations so the intervening sequence block could be flipped and the resulting GC skew pattern profiled.
